# Supplementary material
Source: PubMed Central journal article supplement (PMC3470451)

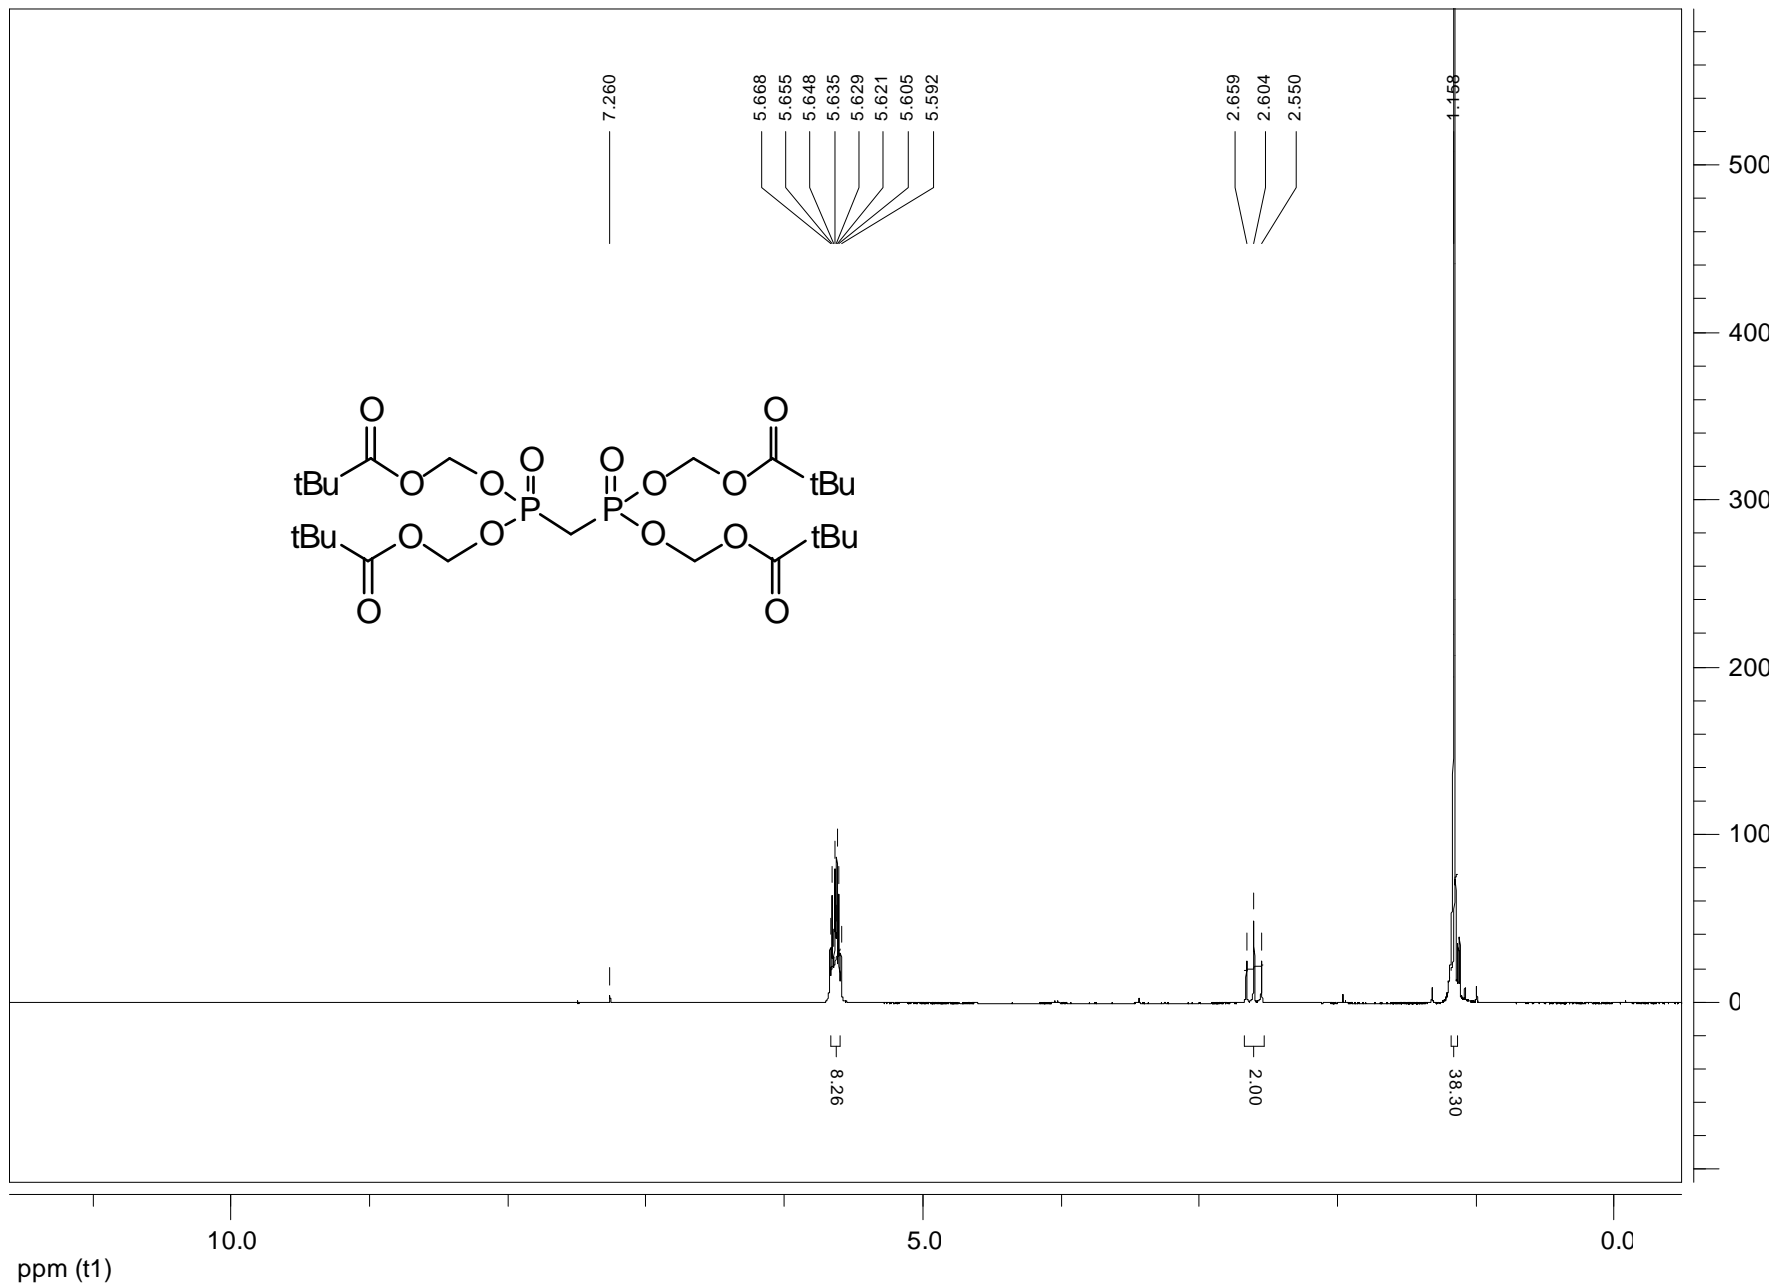

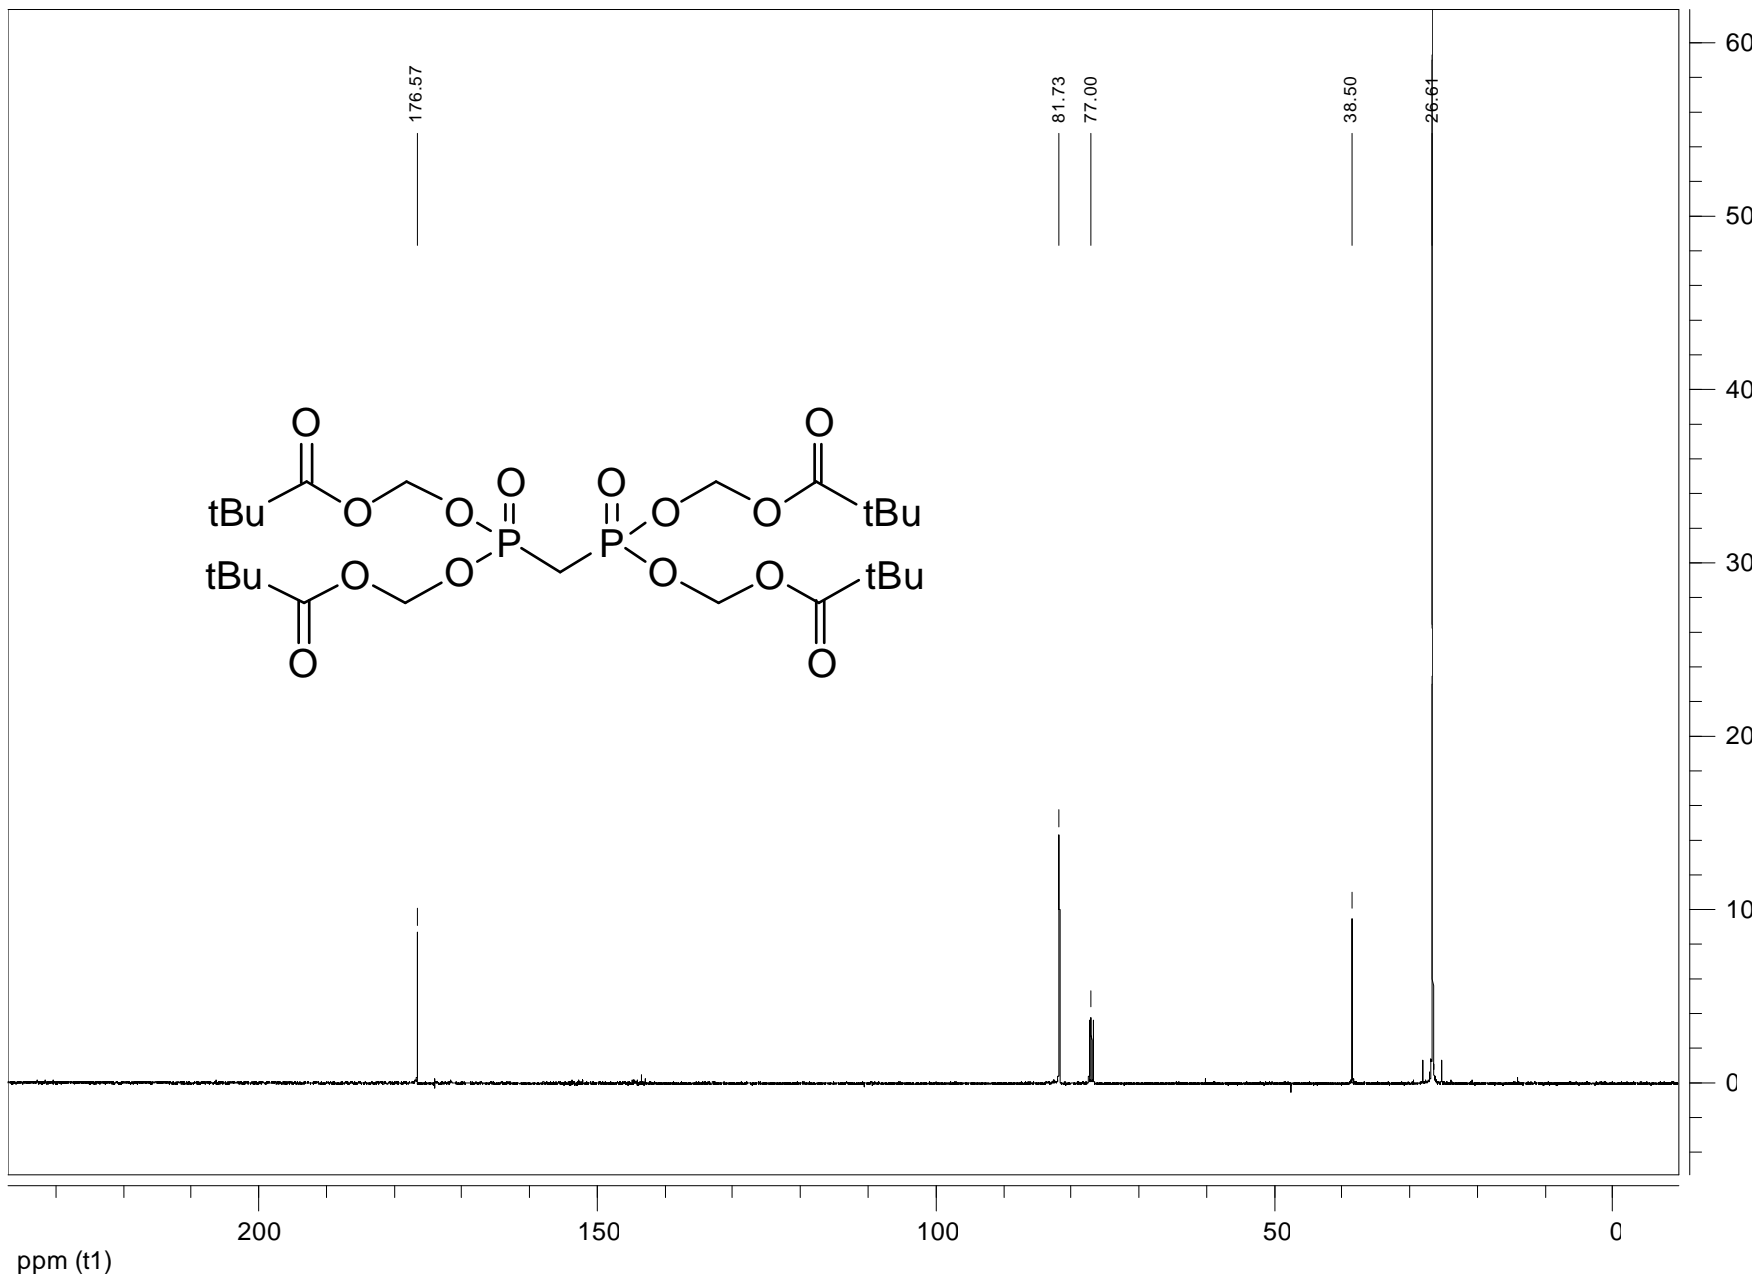

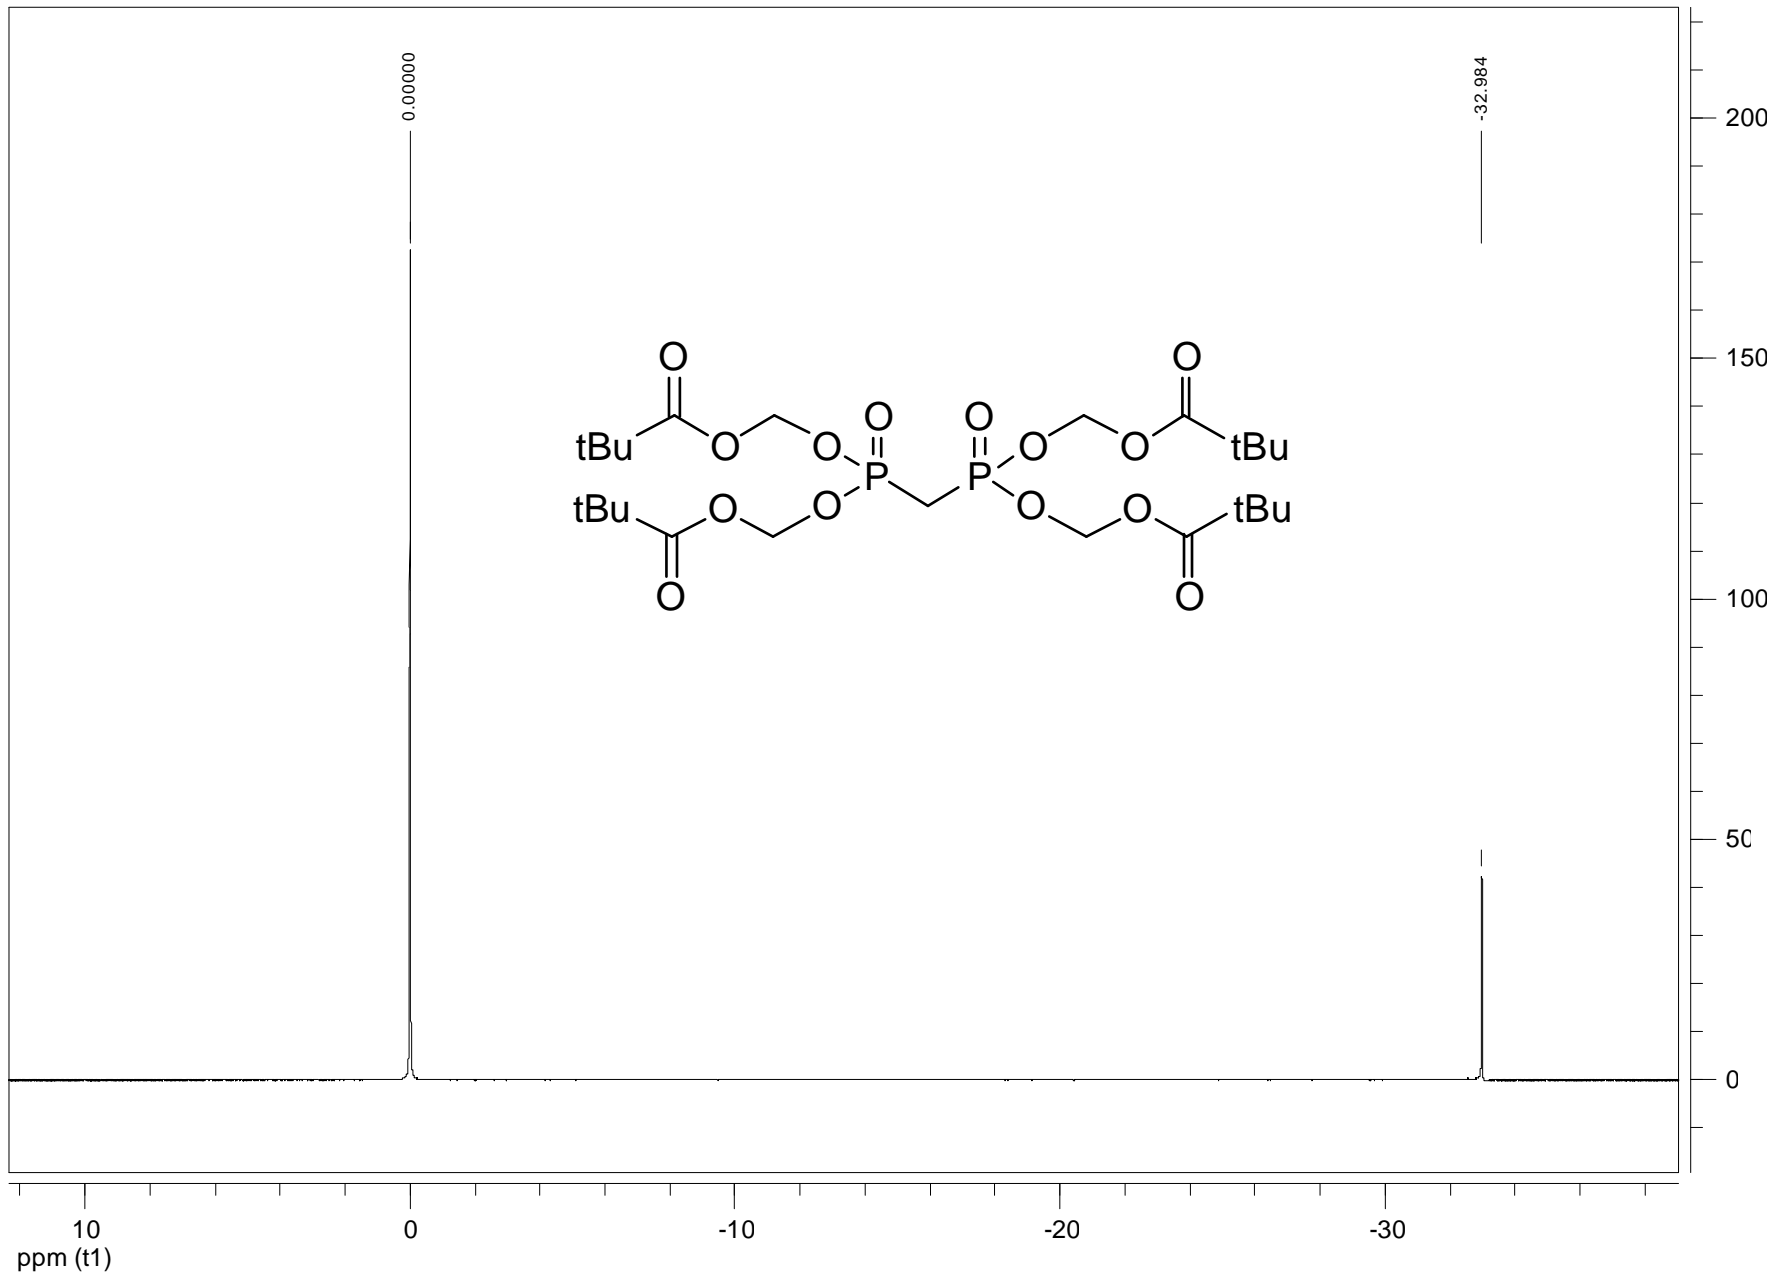

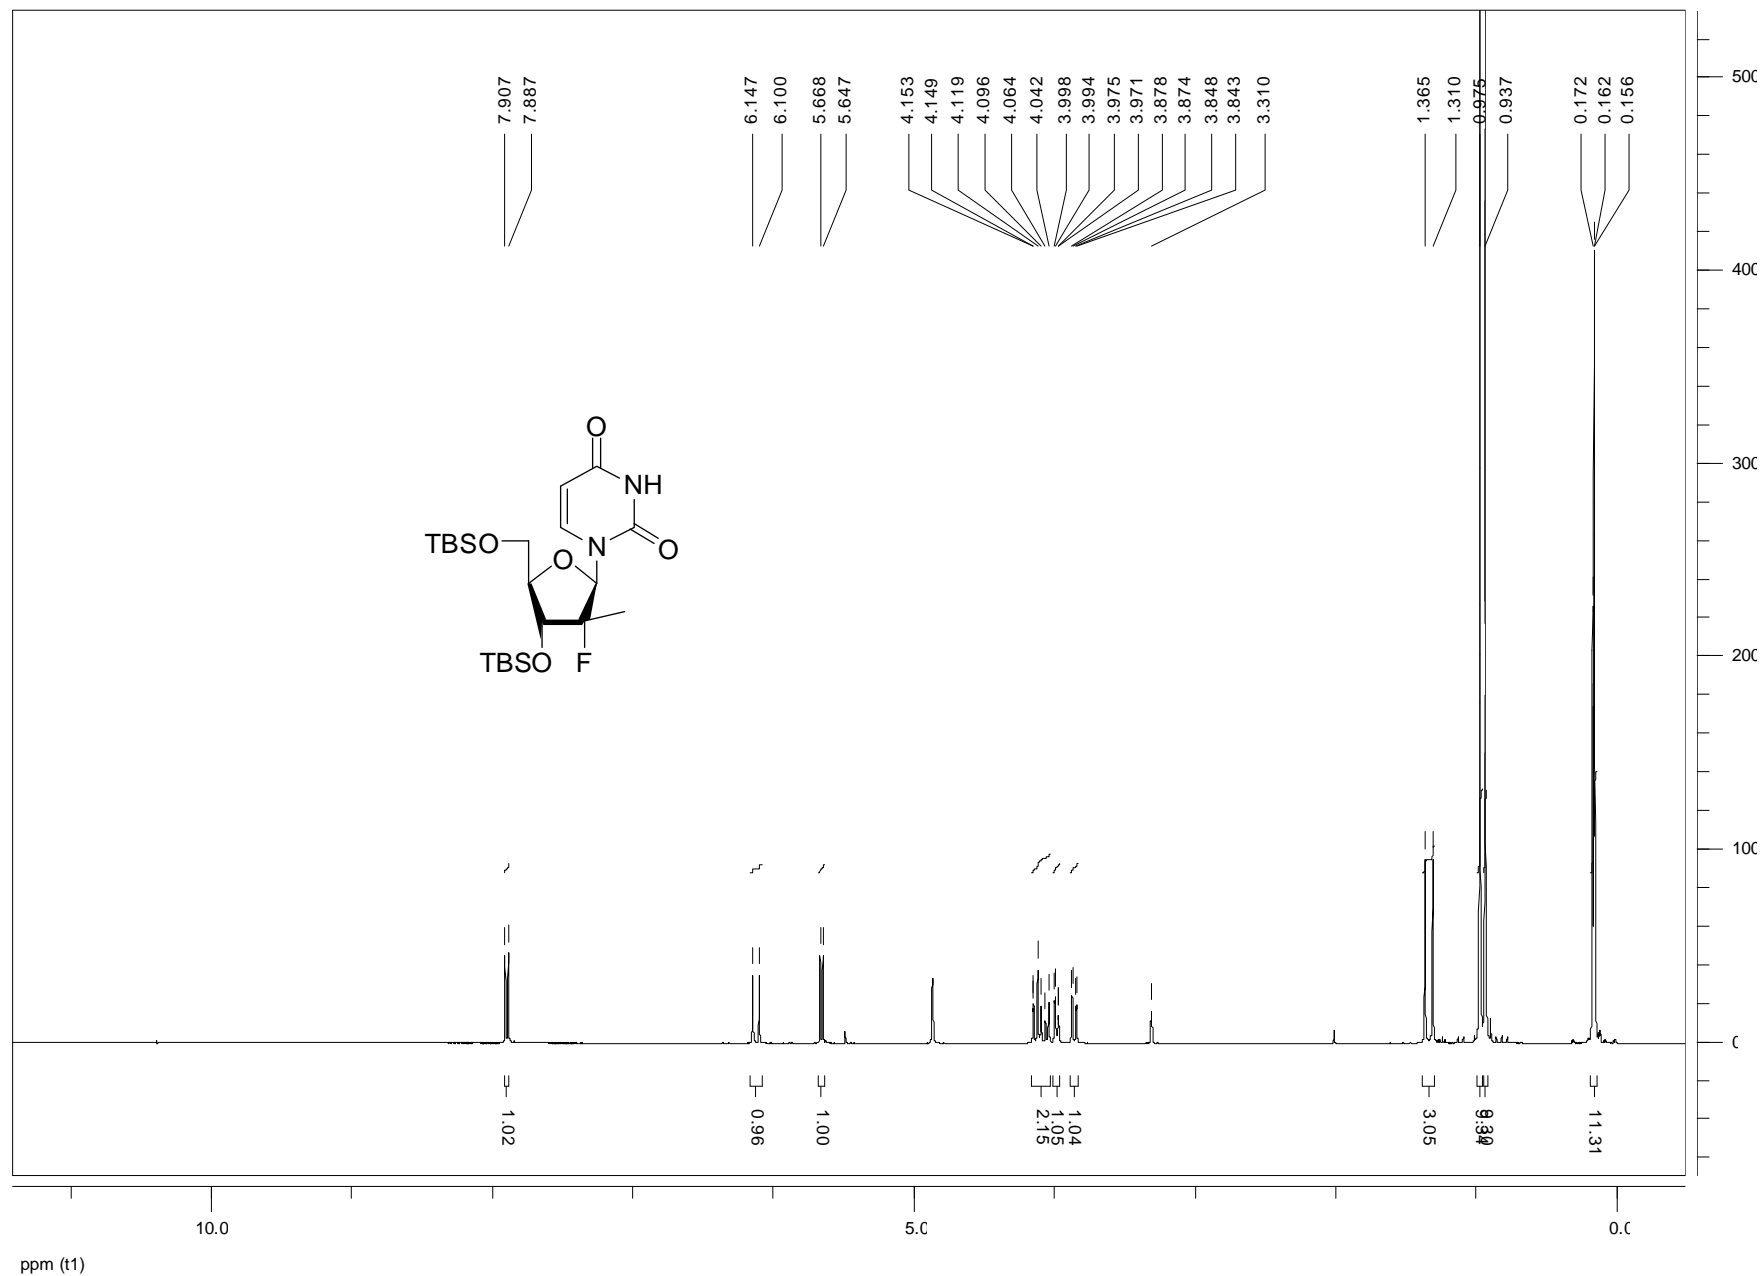

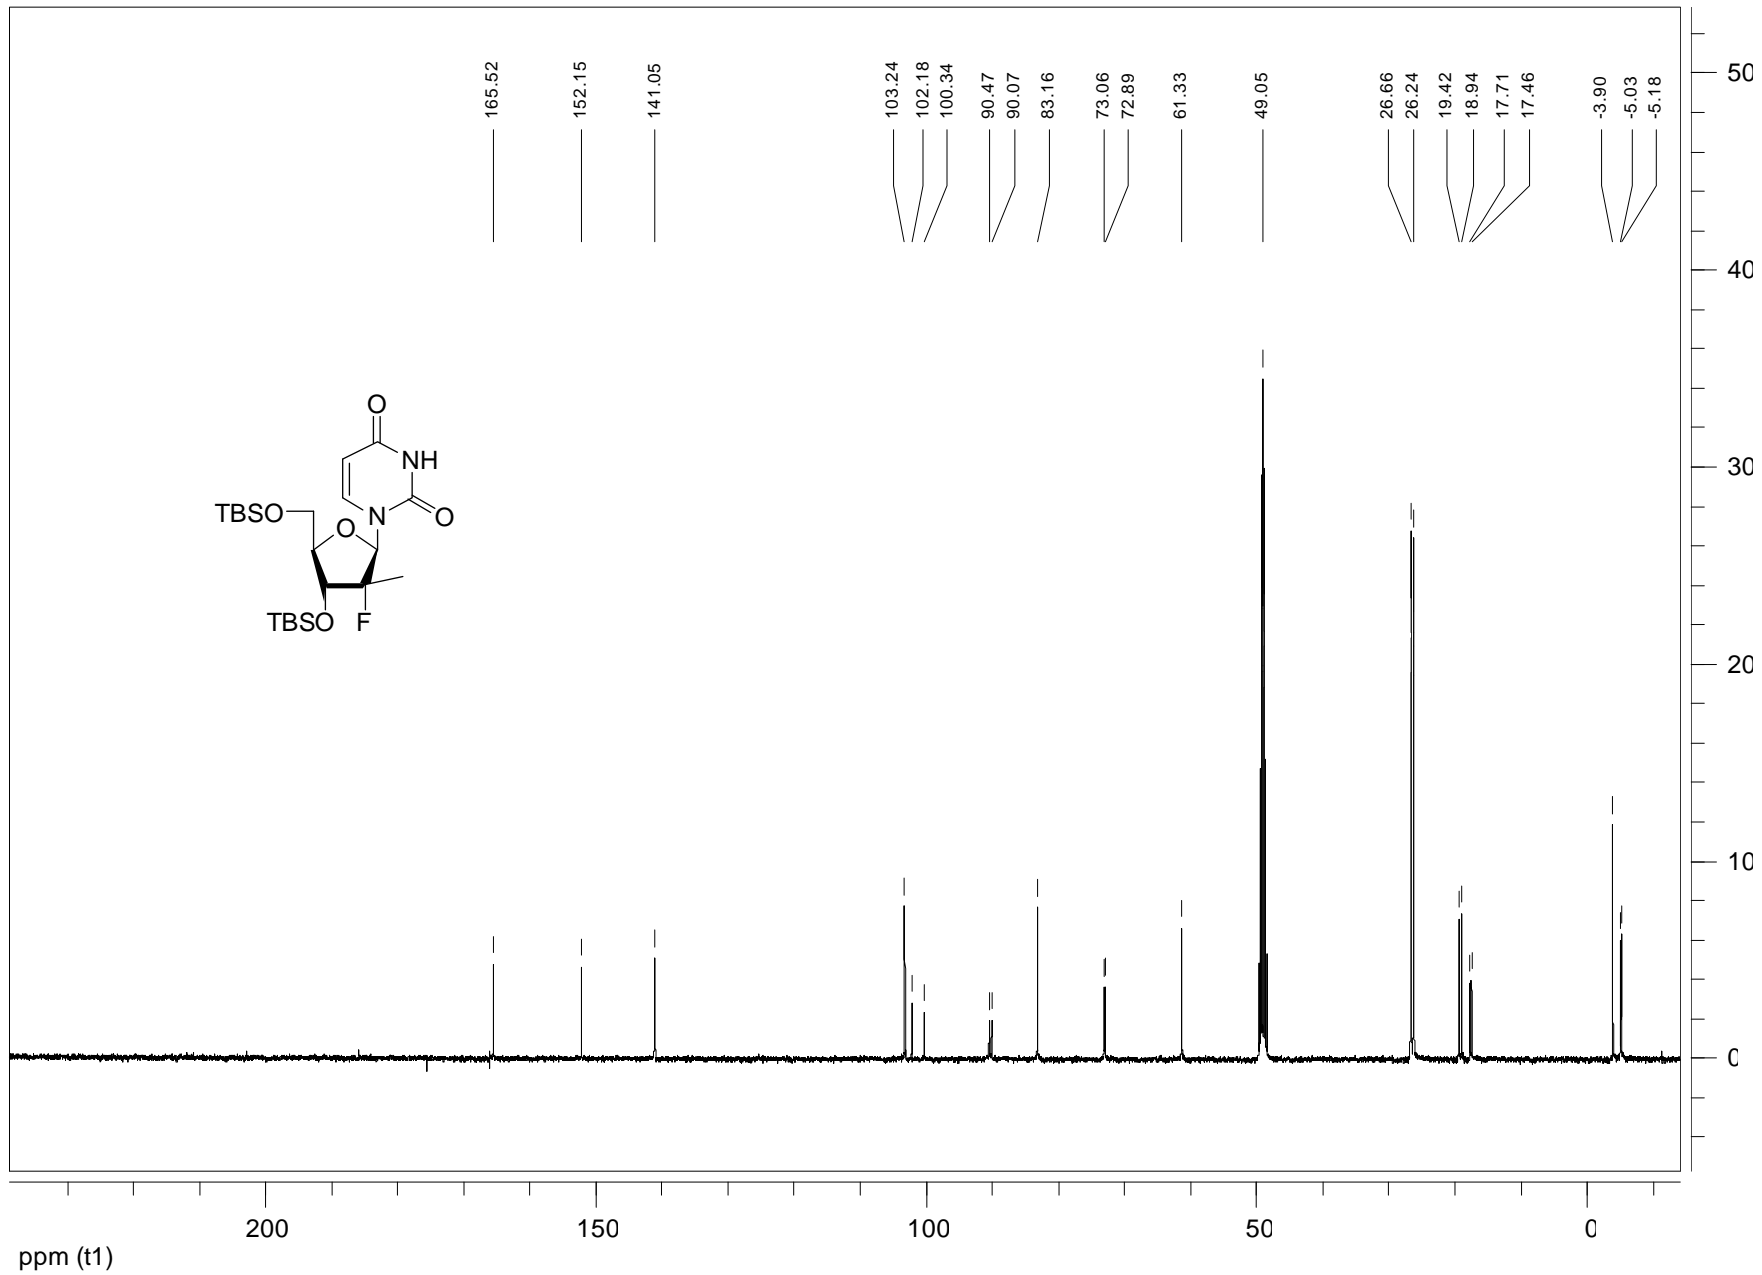

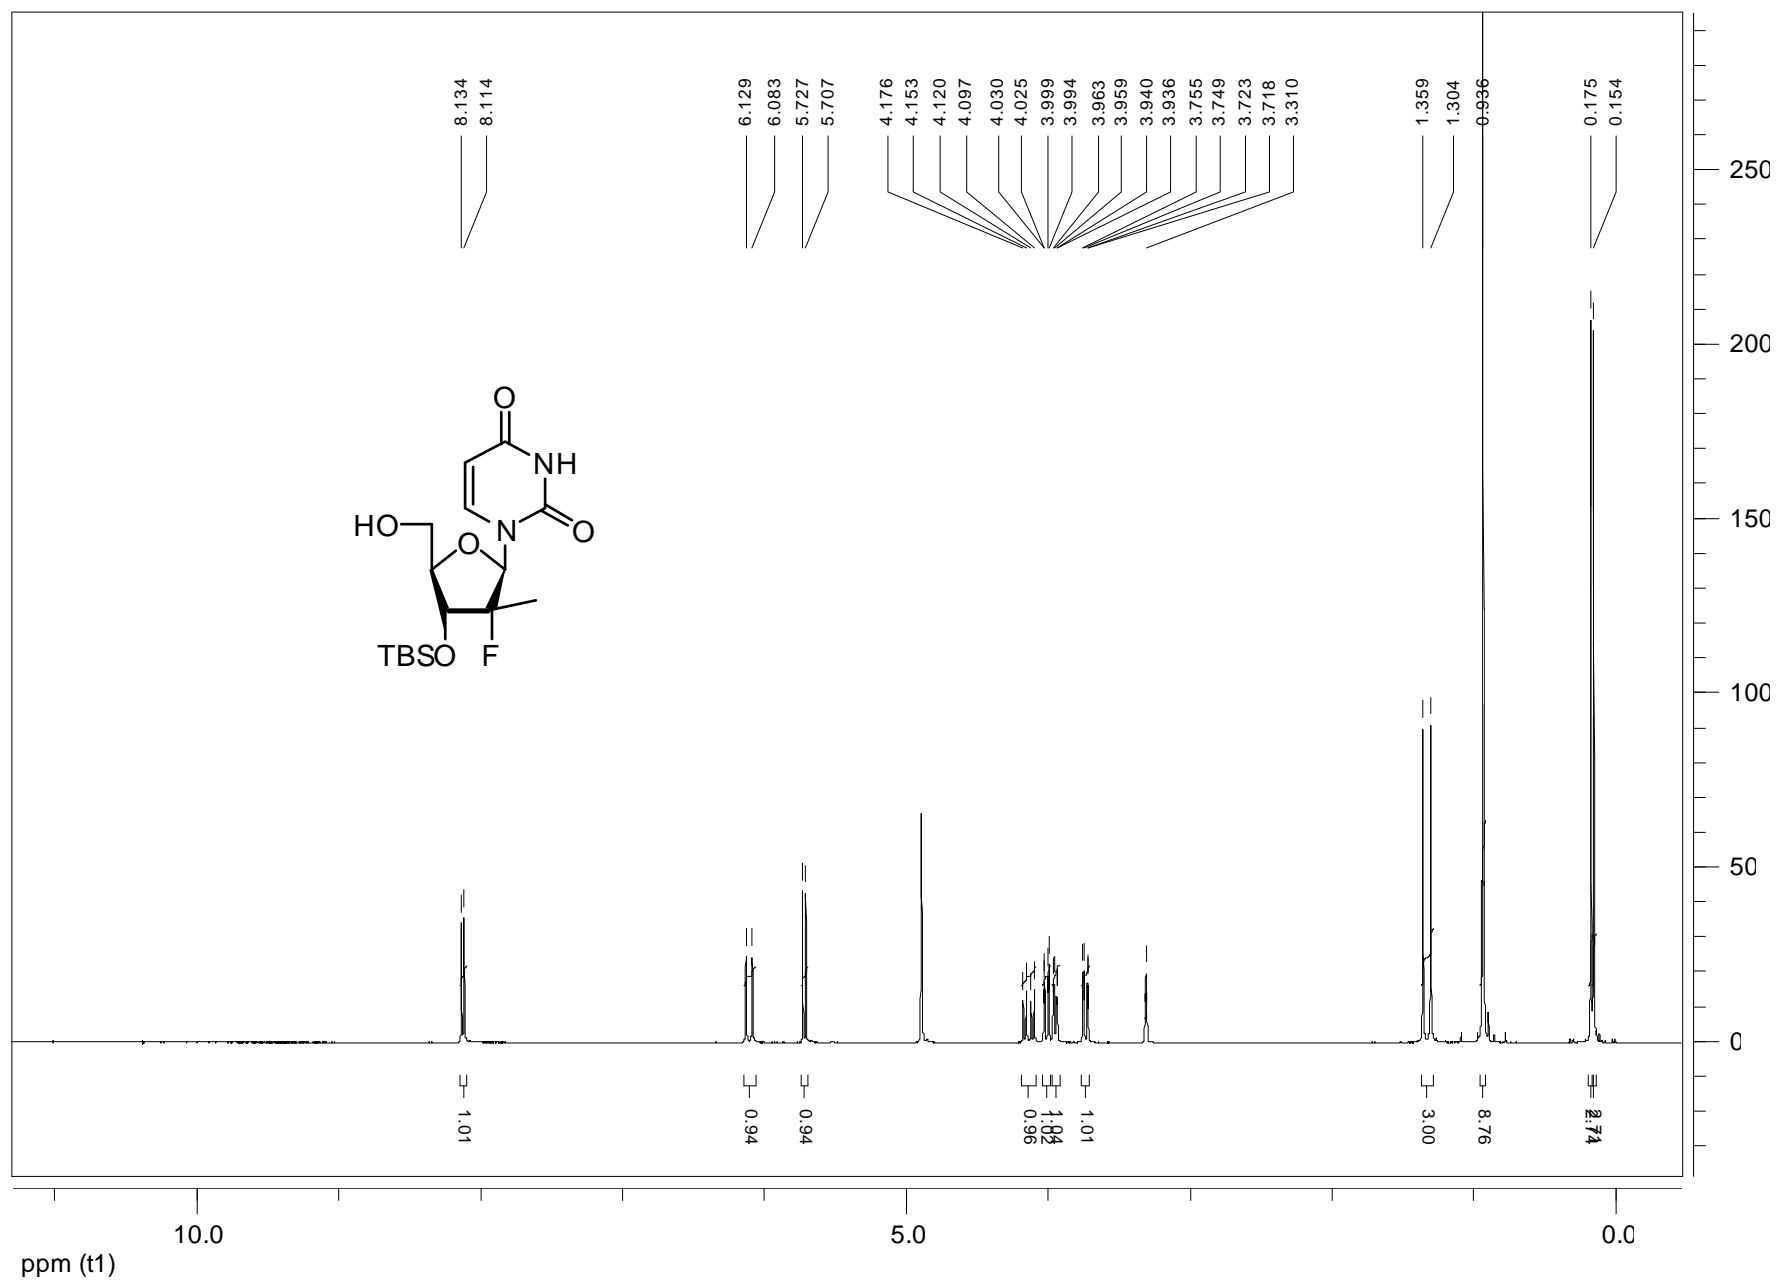

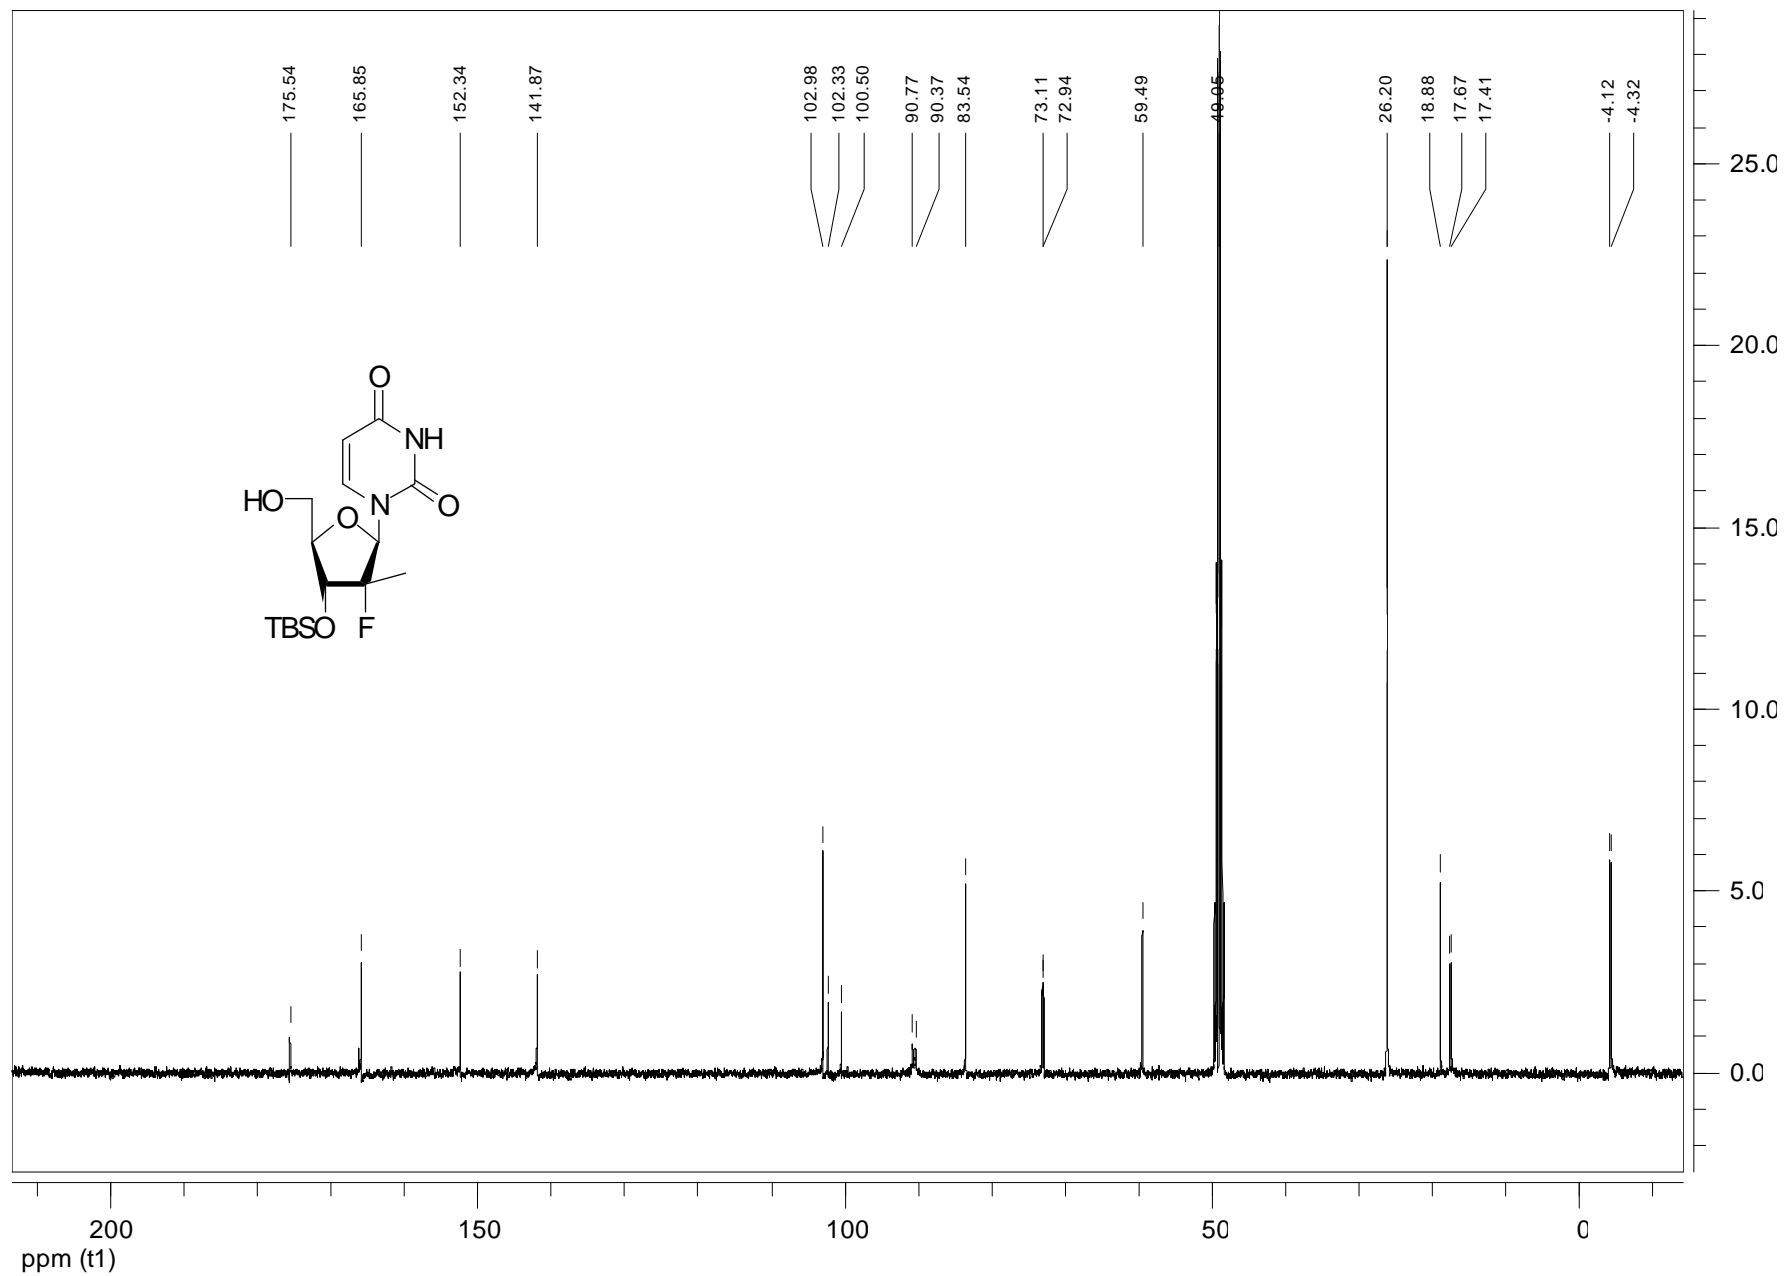

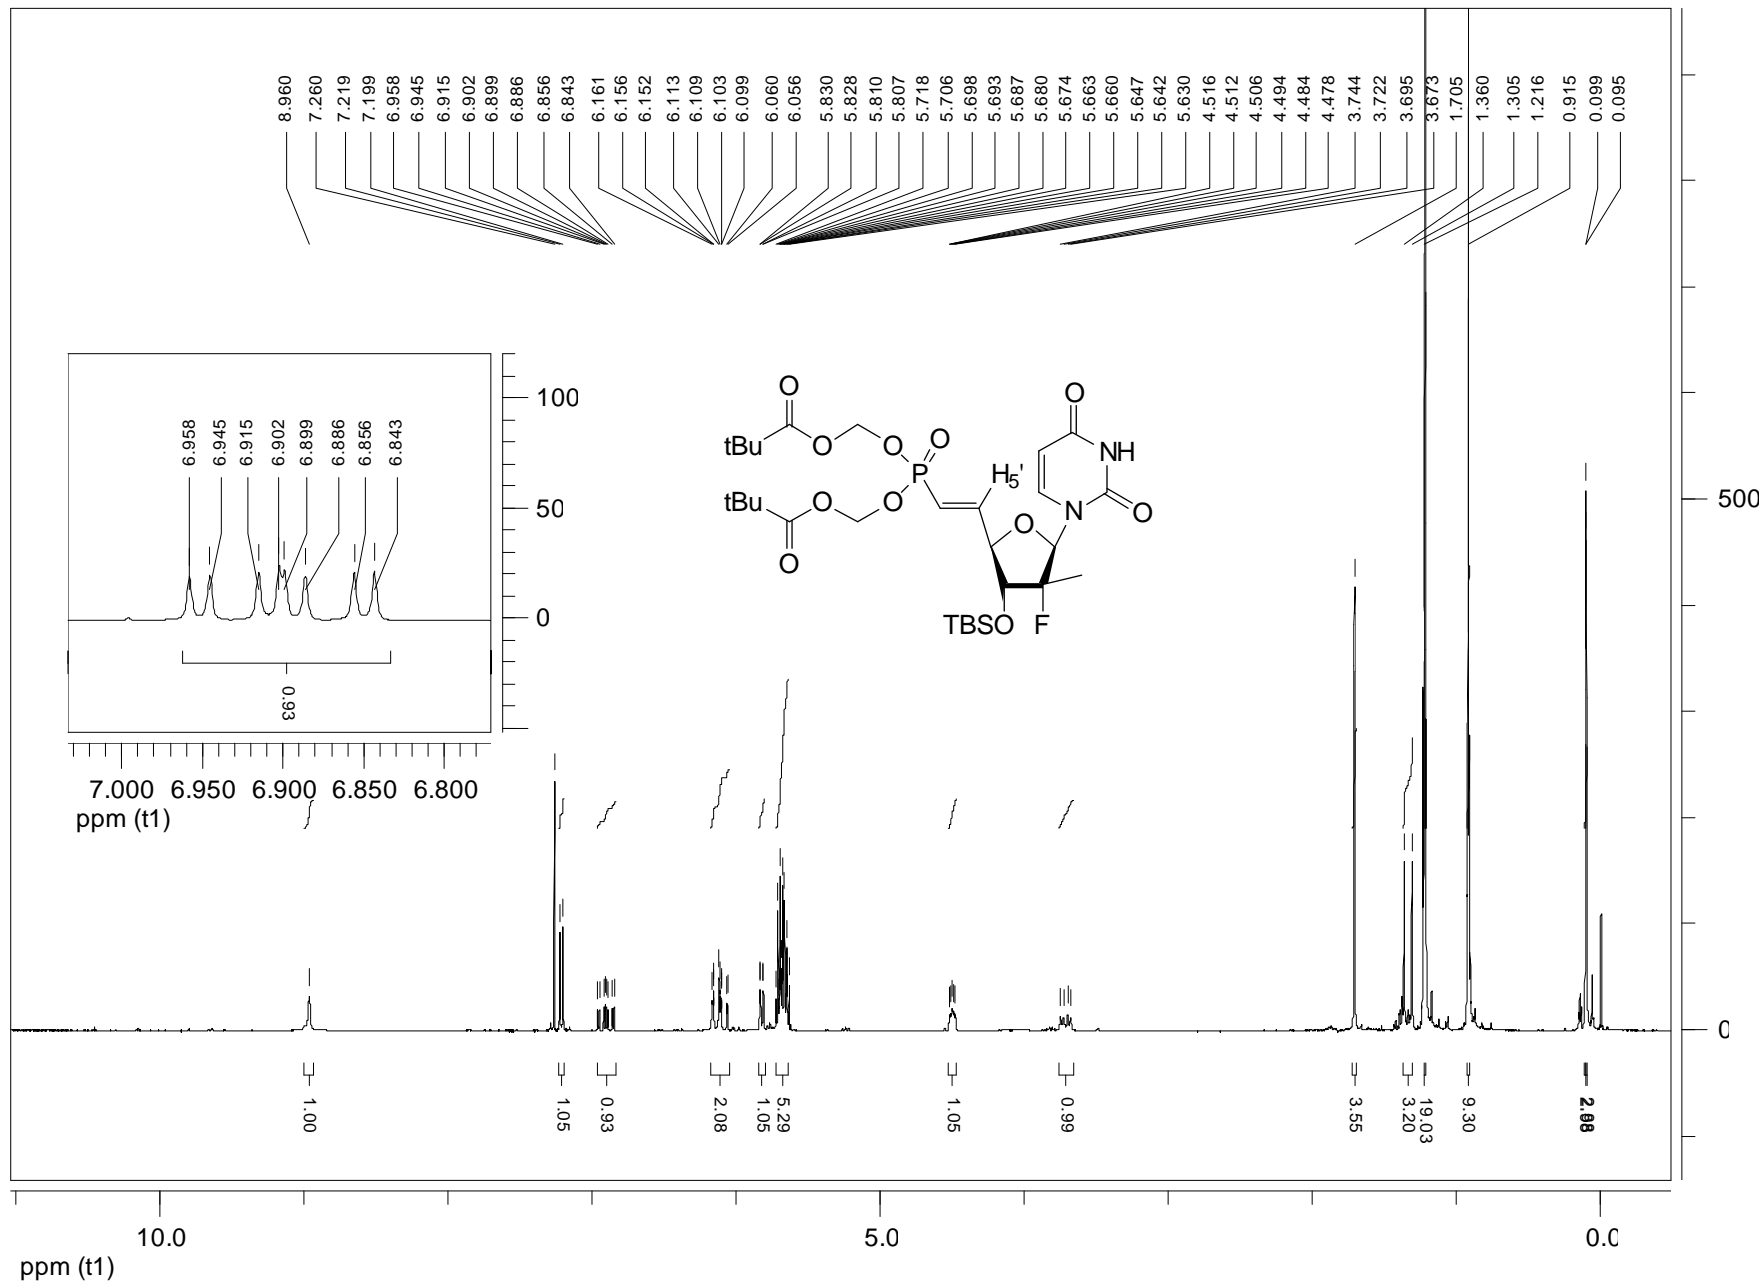



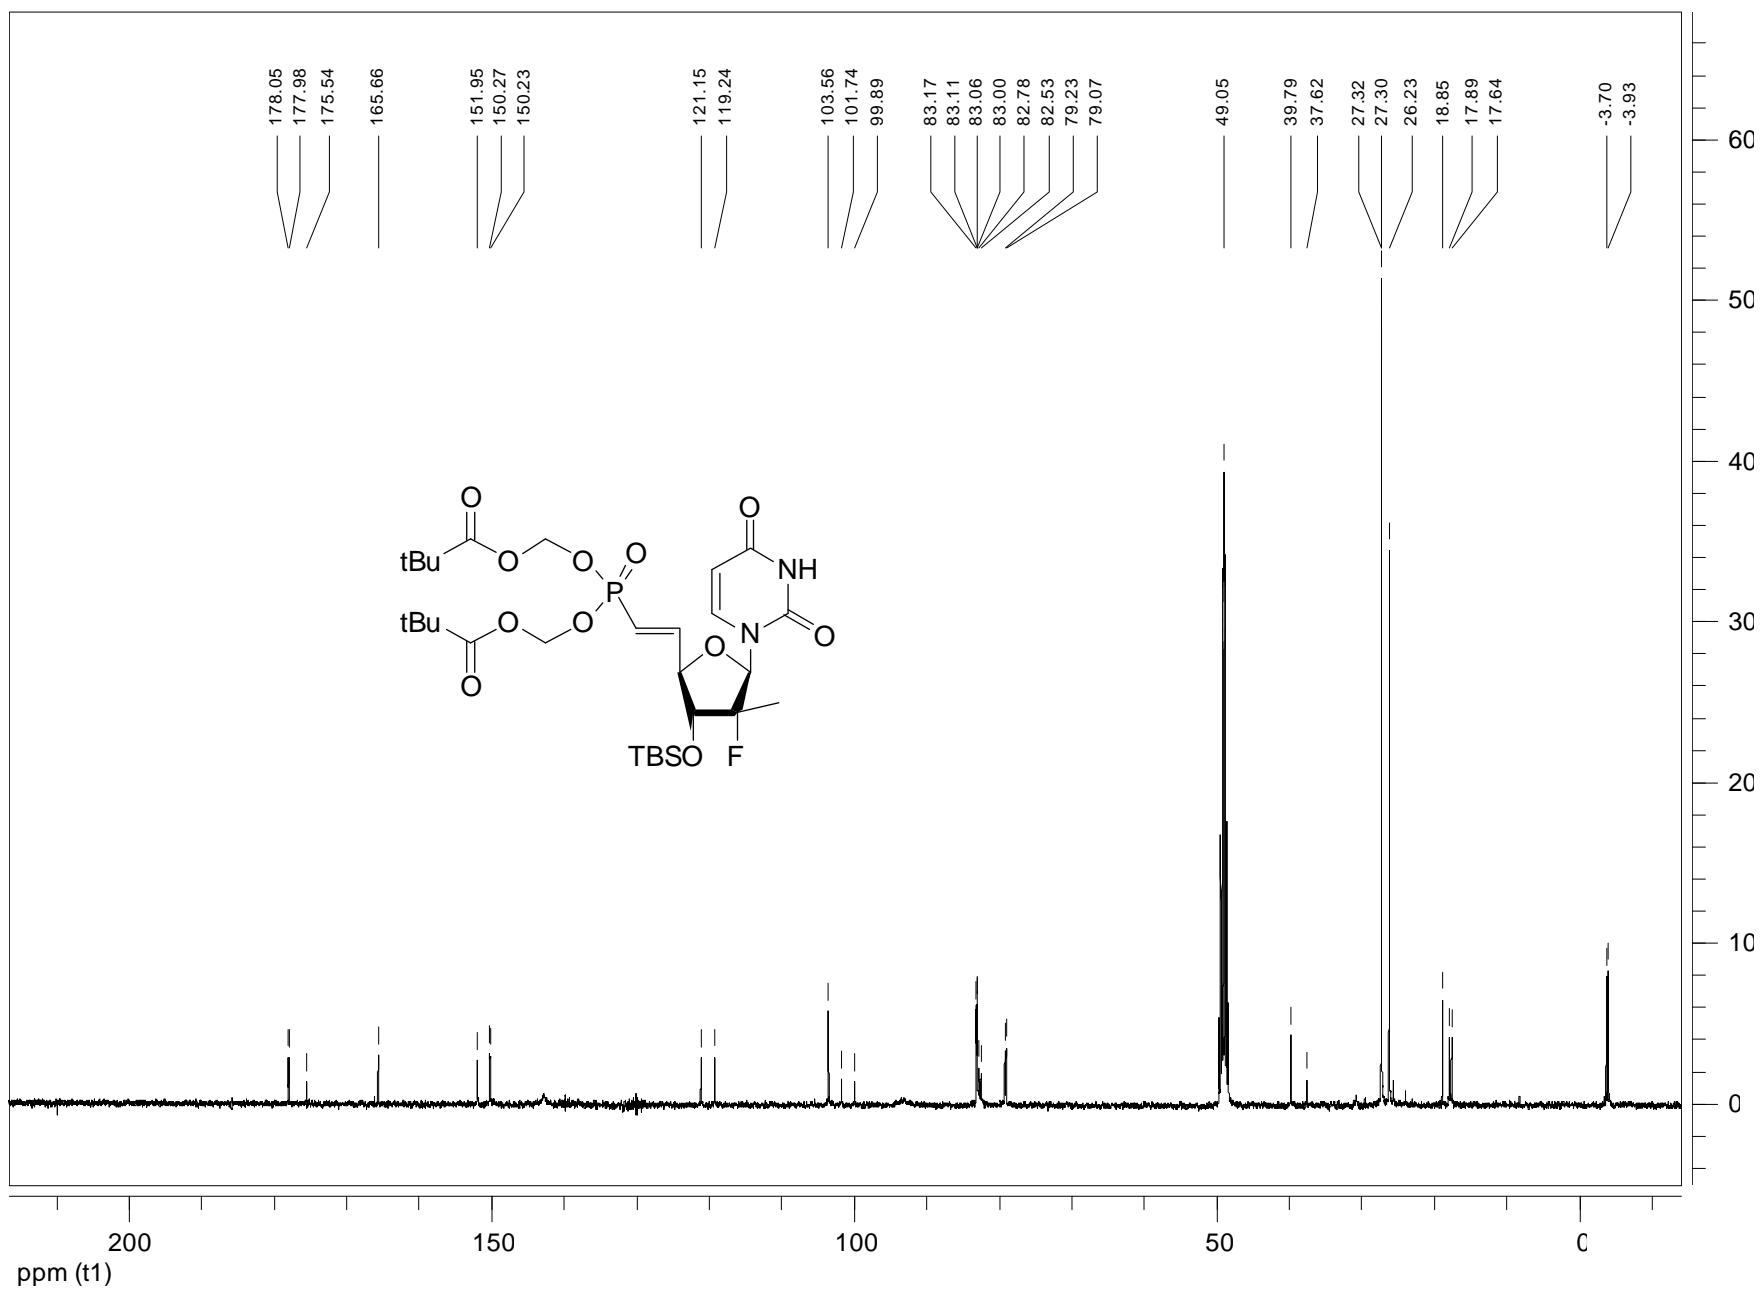

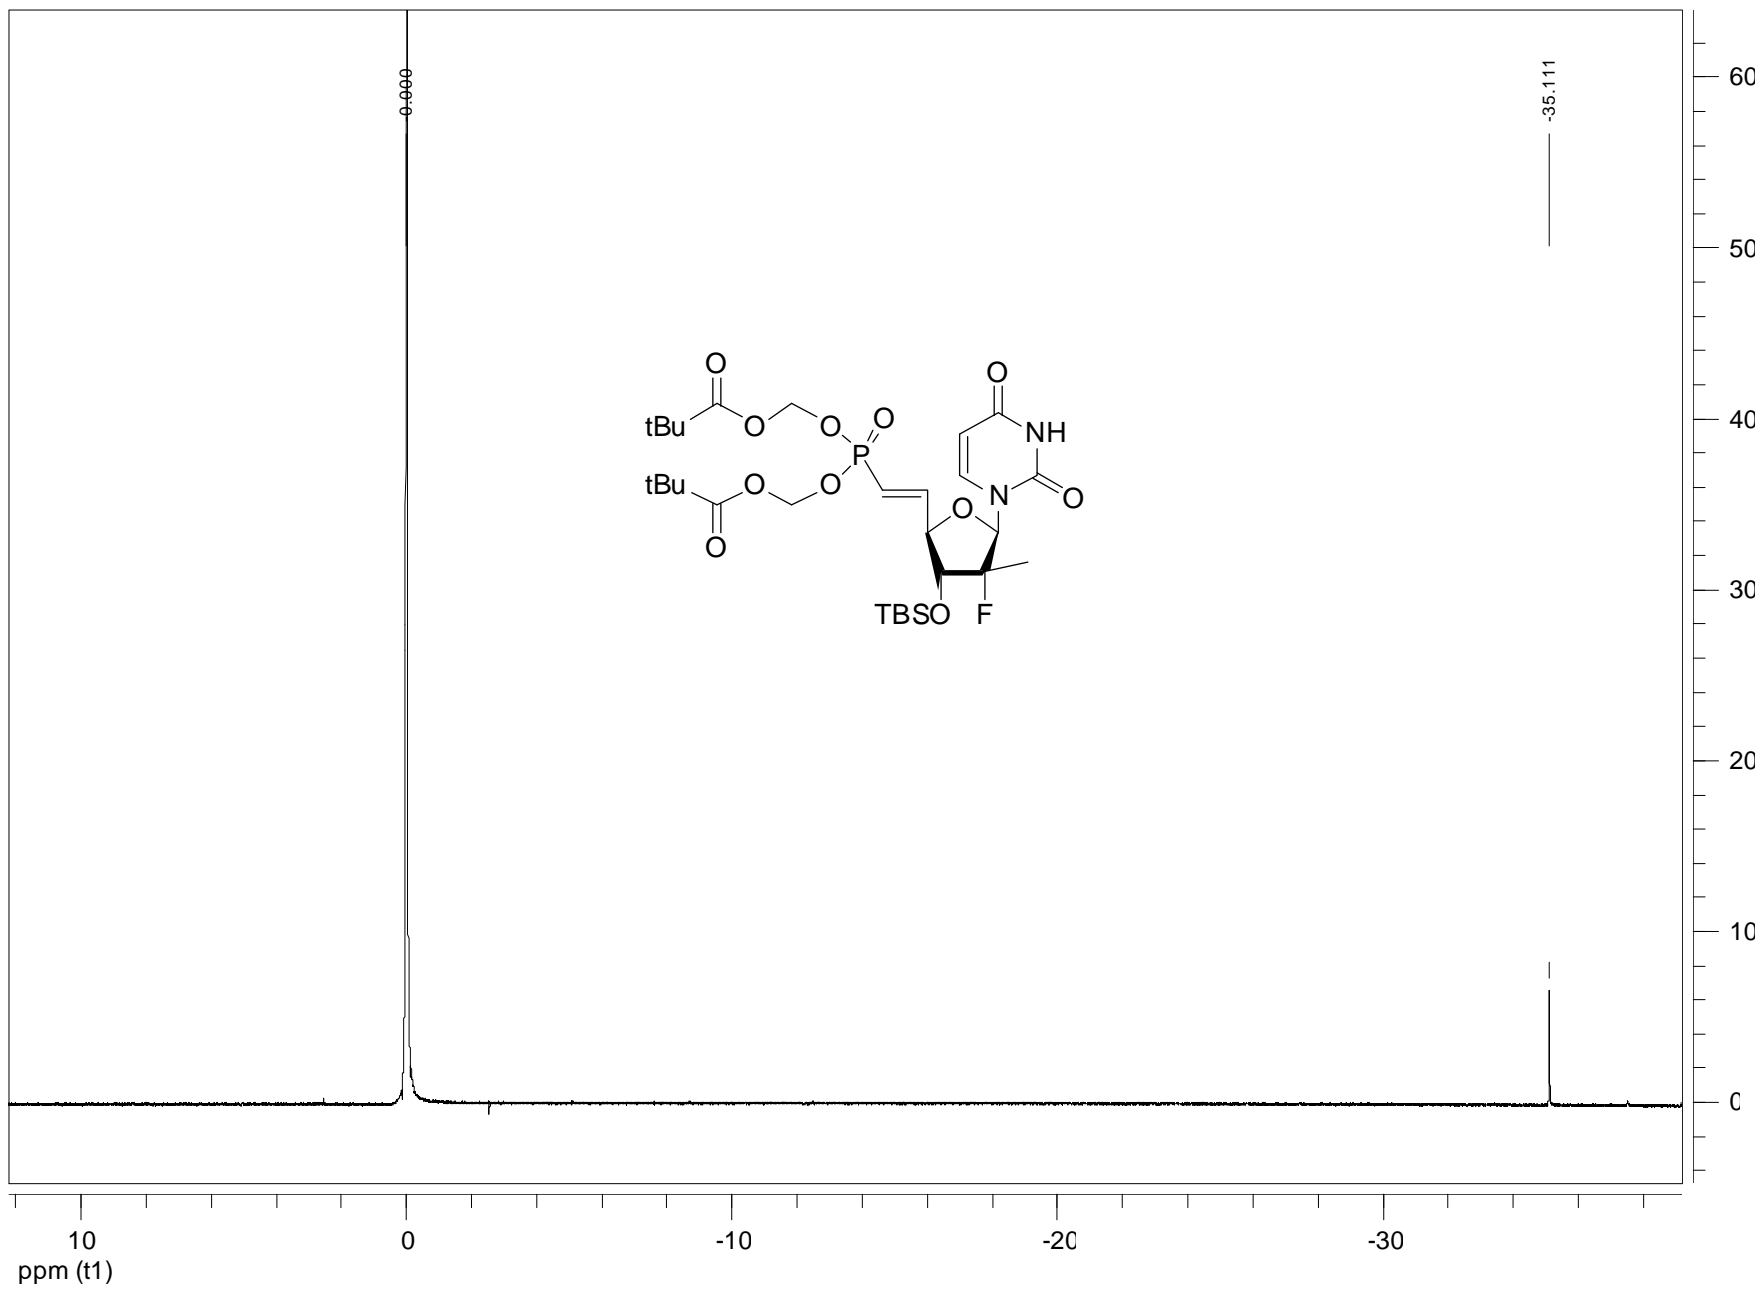

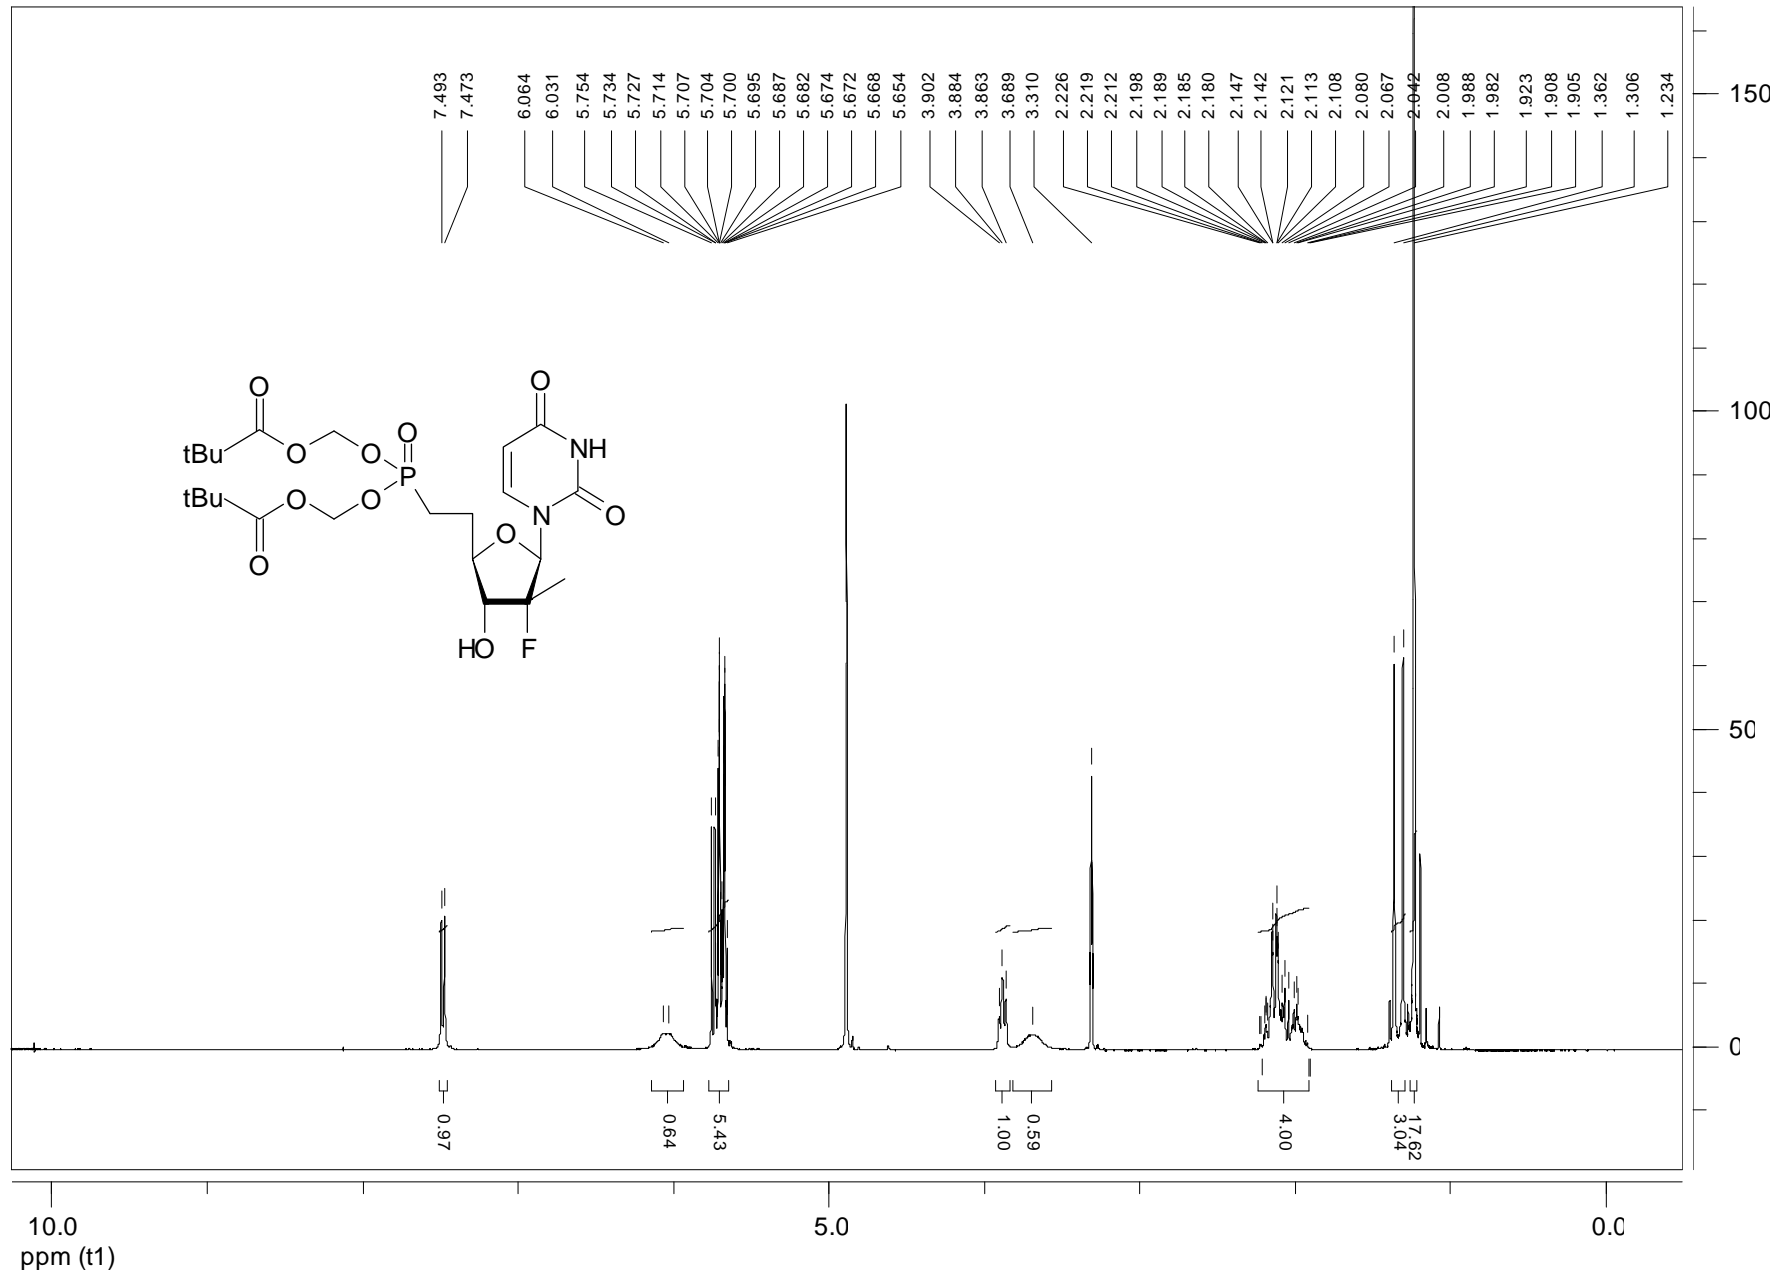

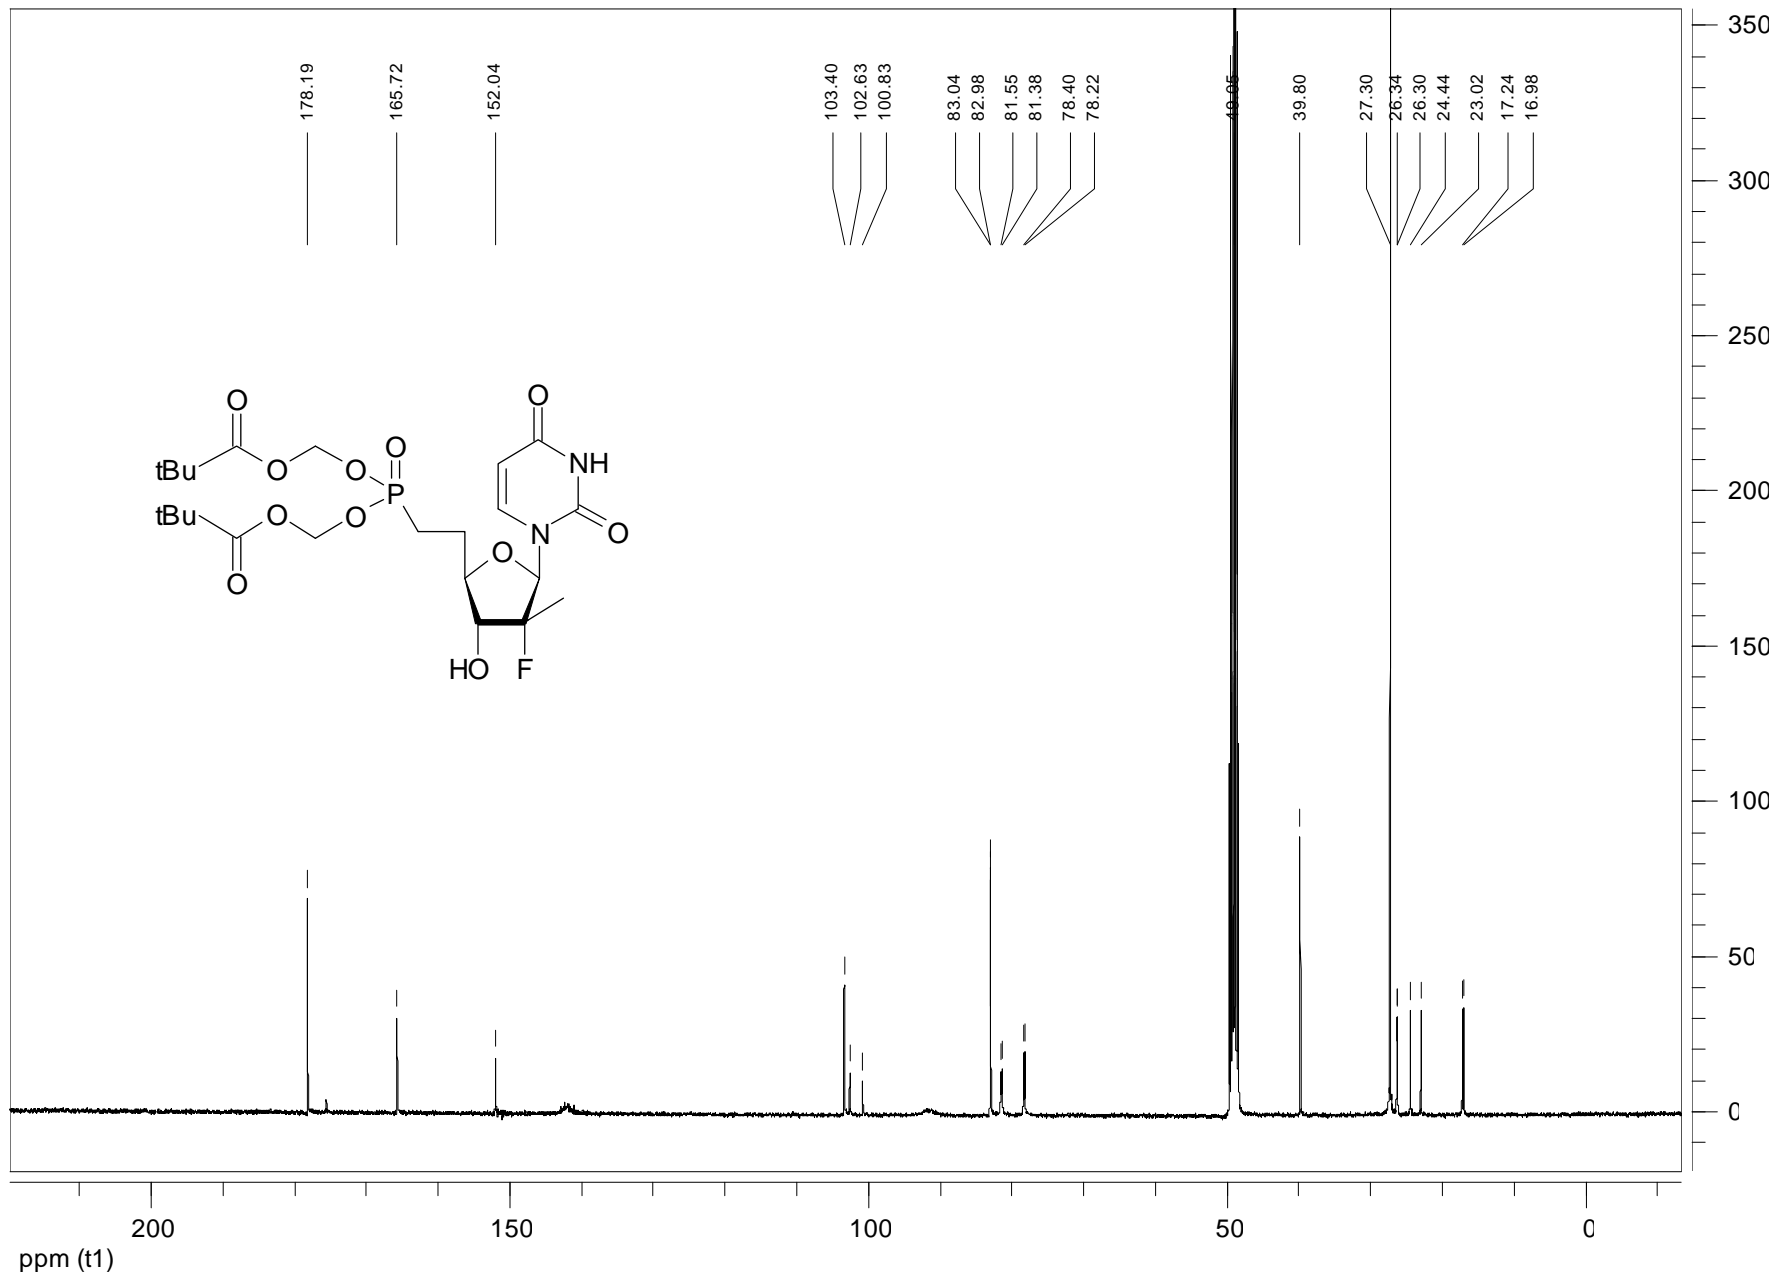

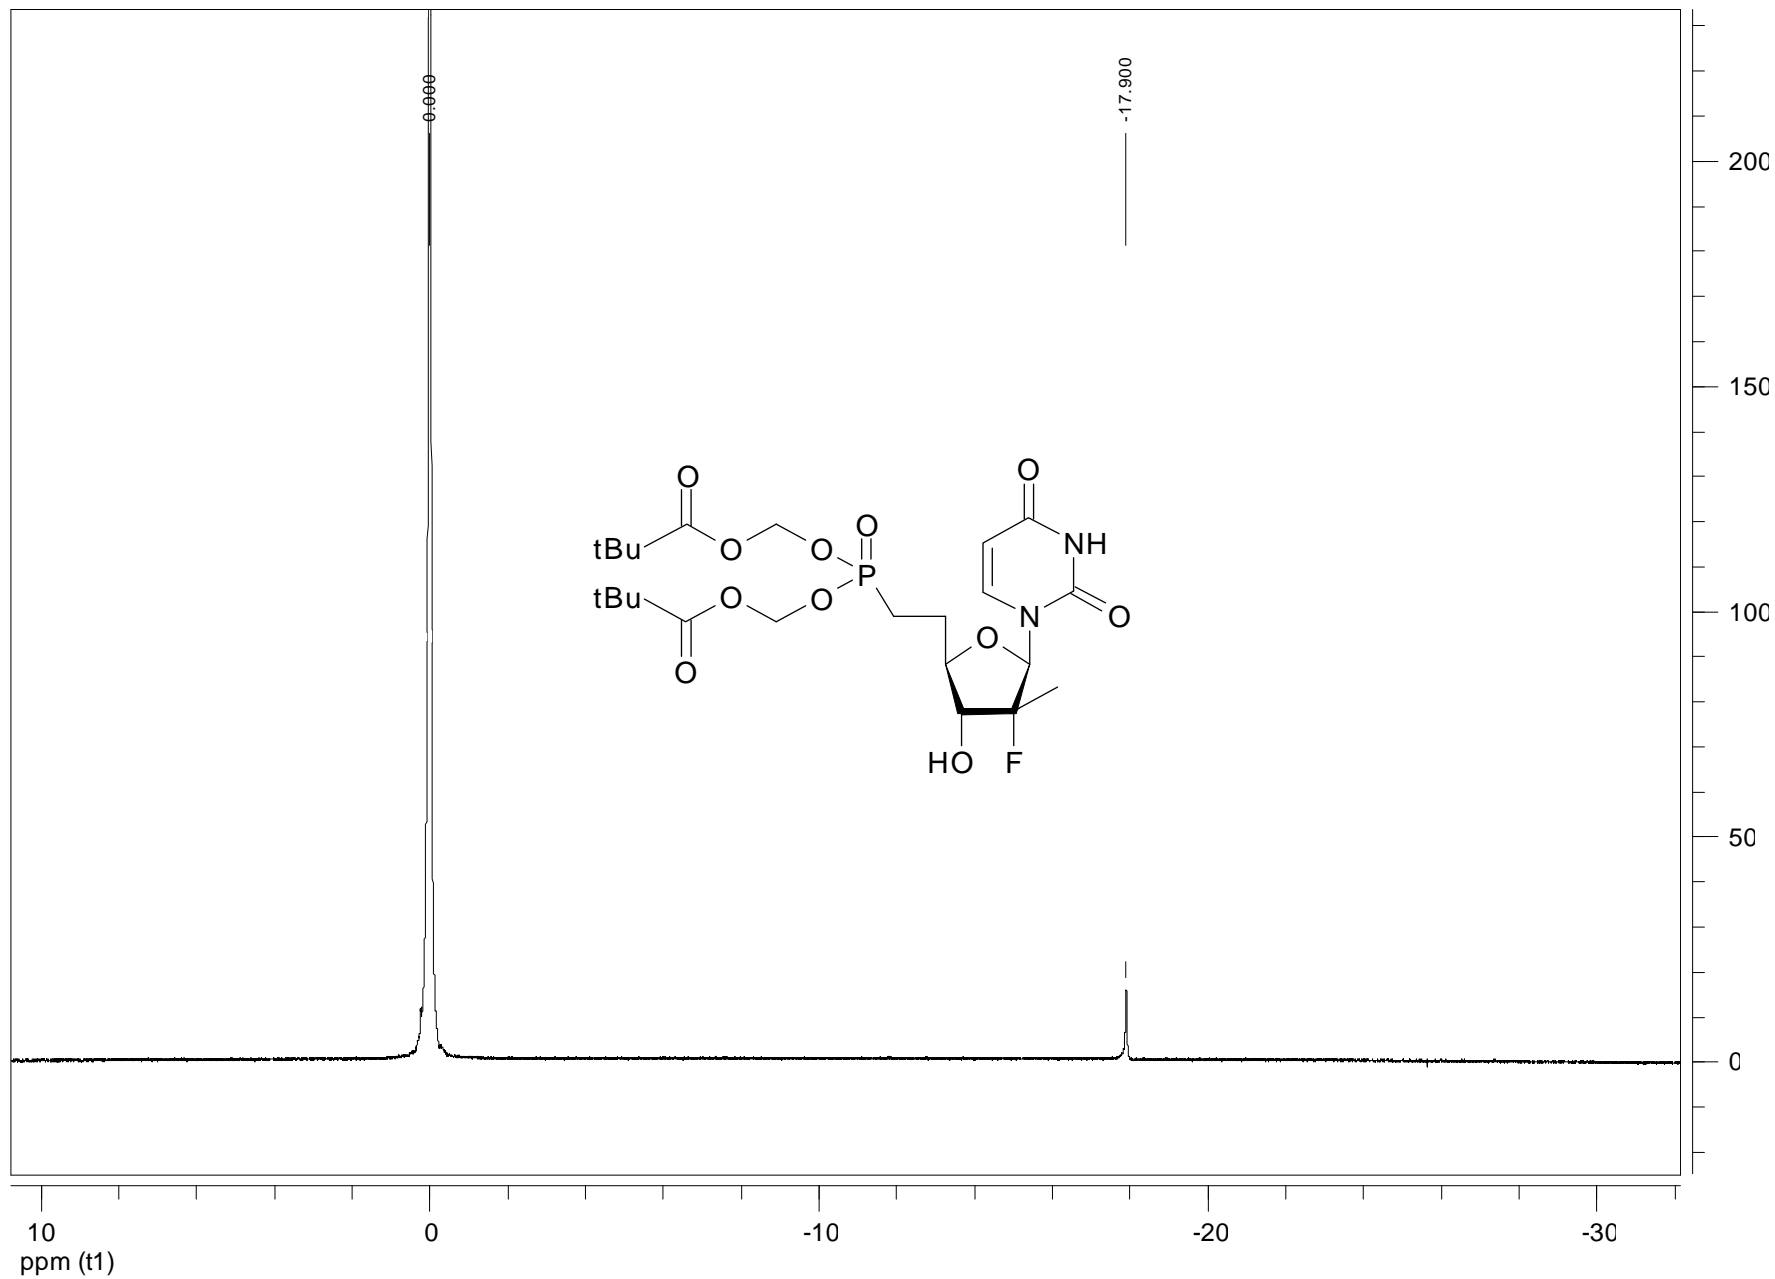

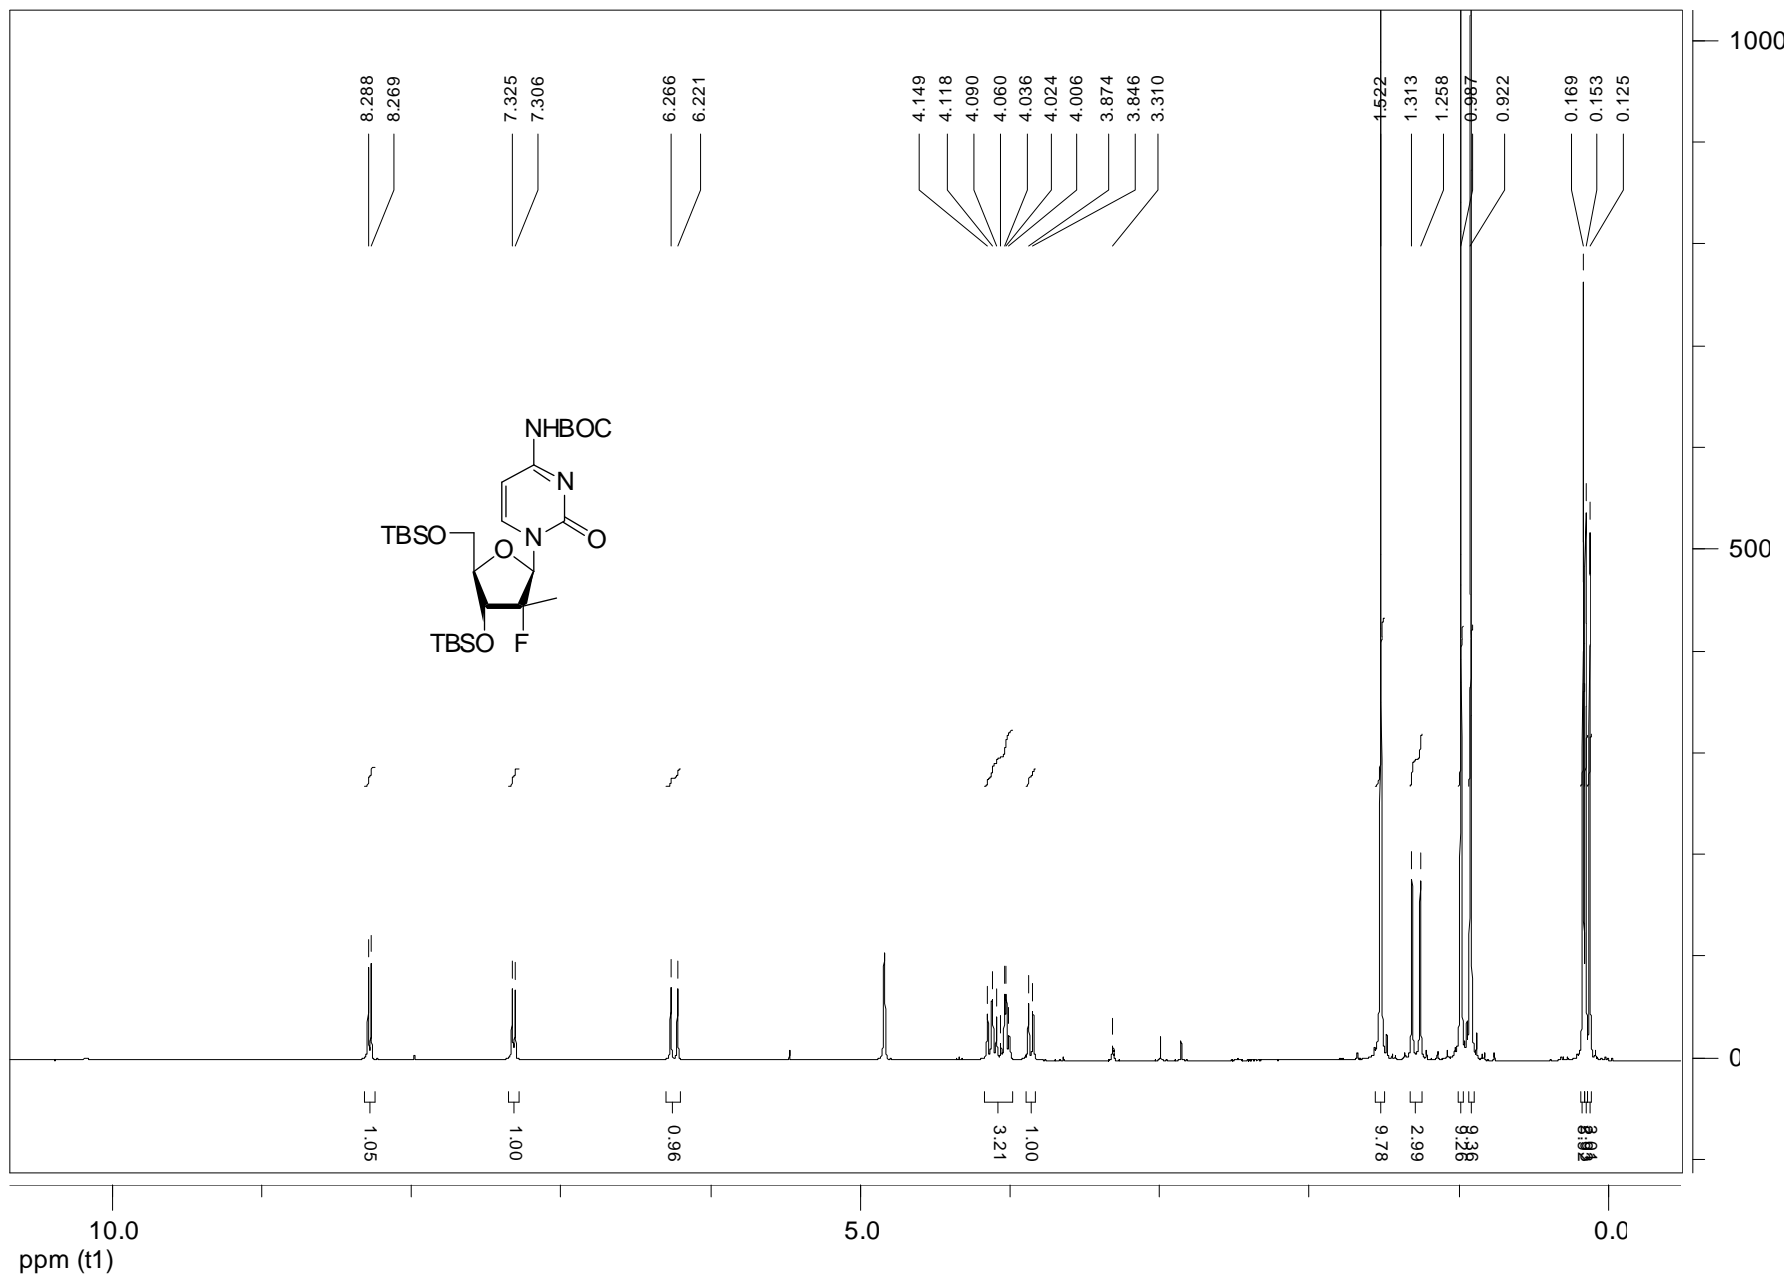

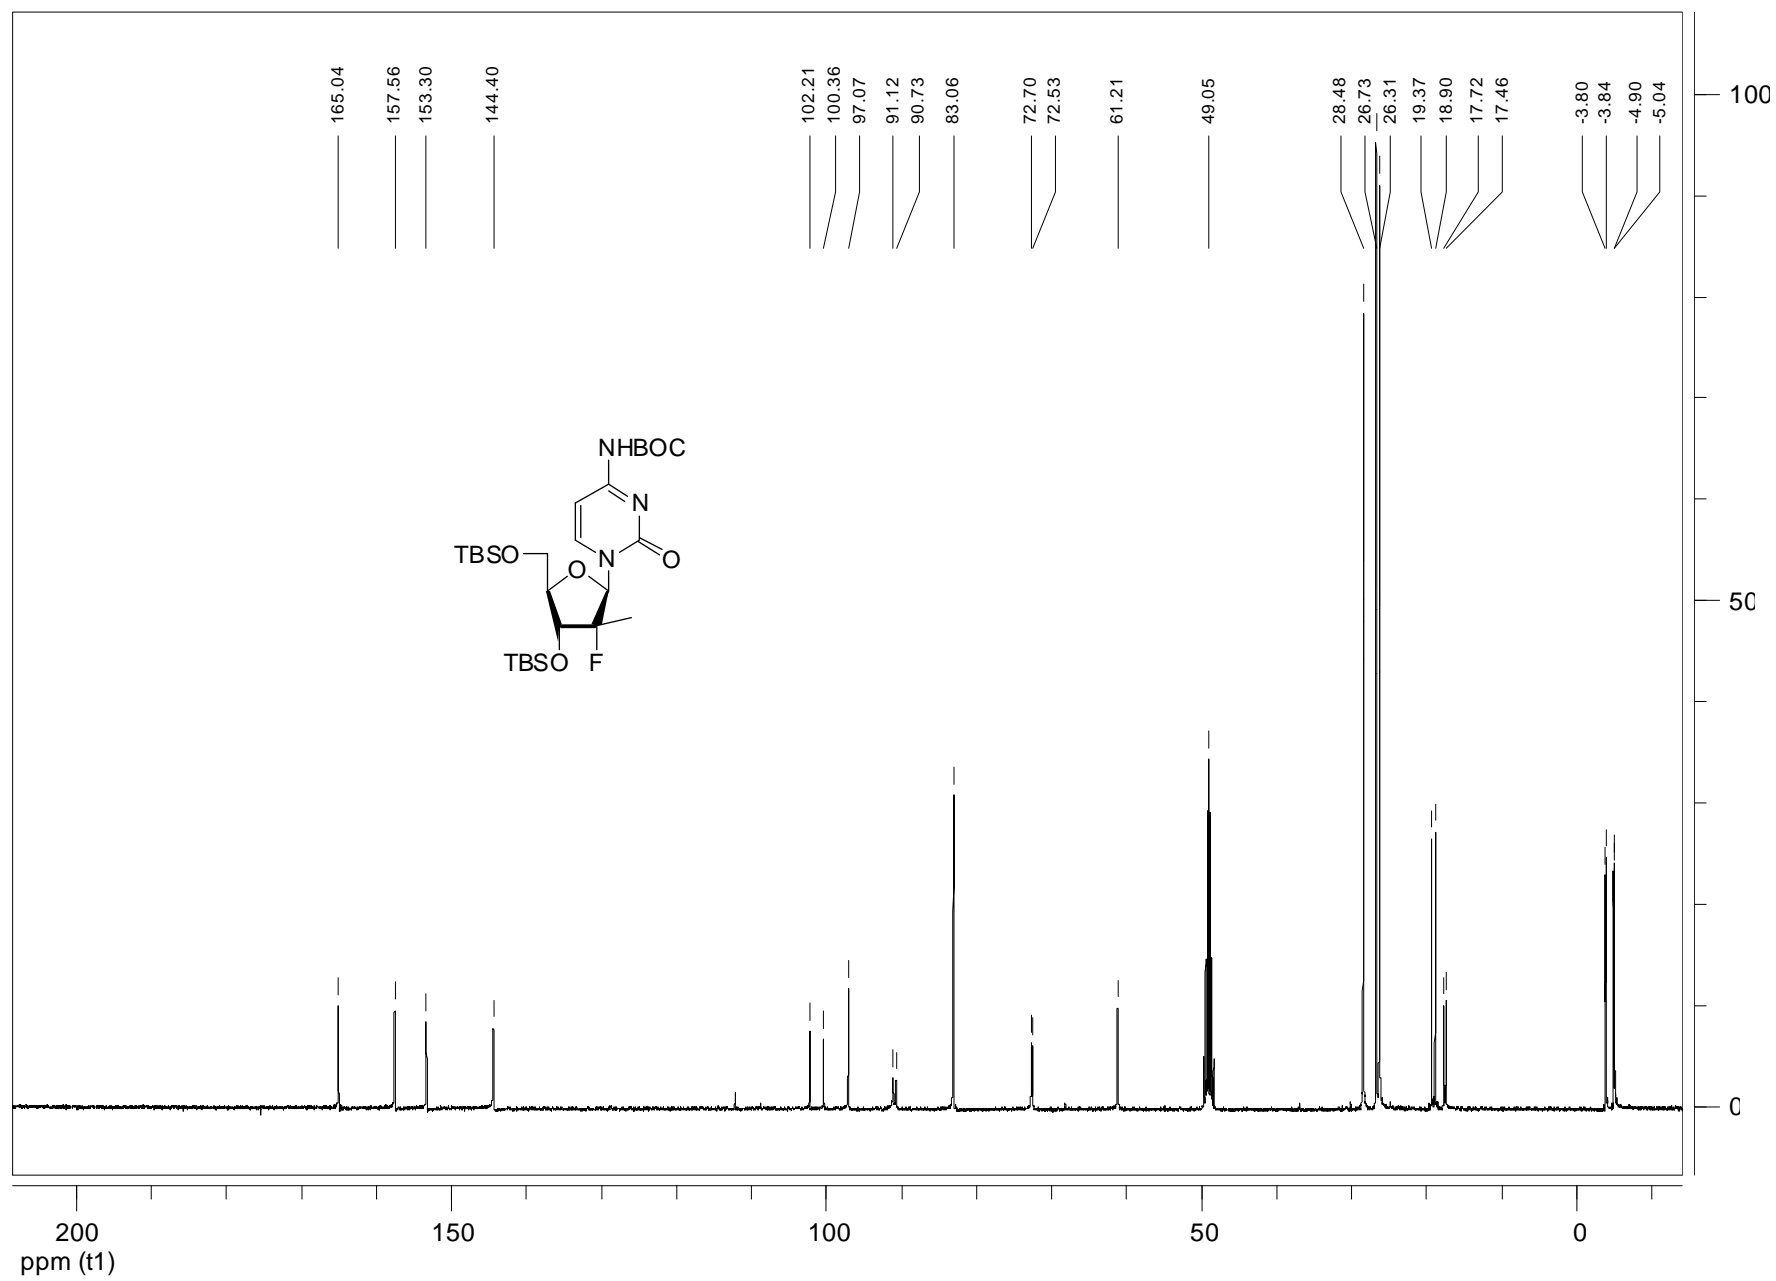

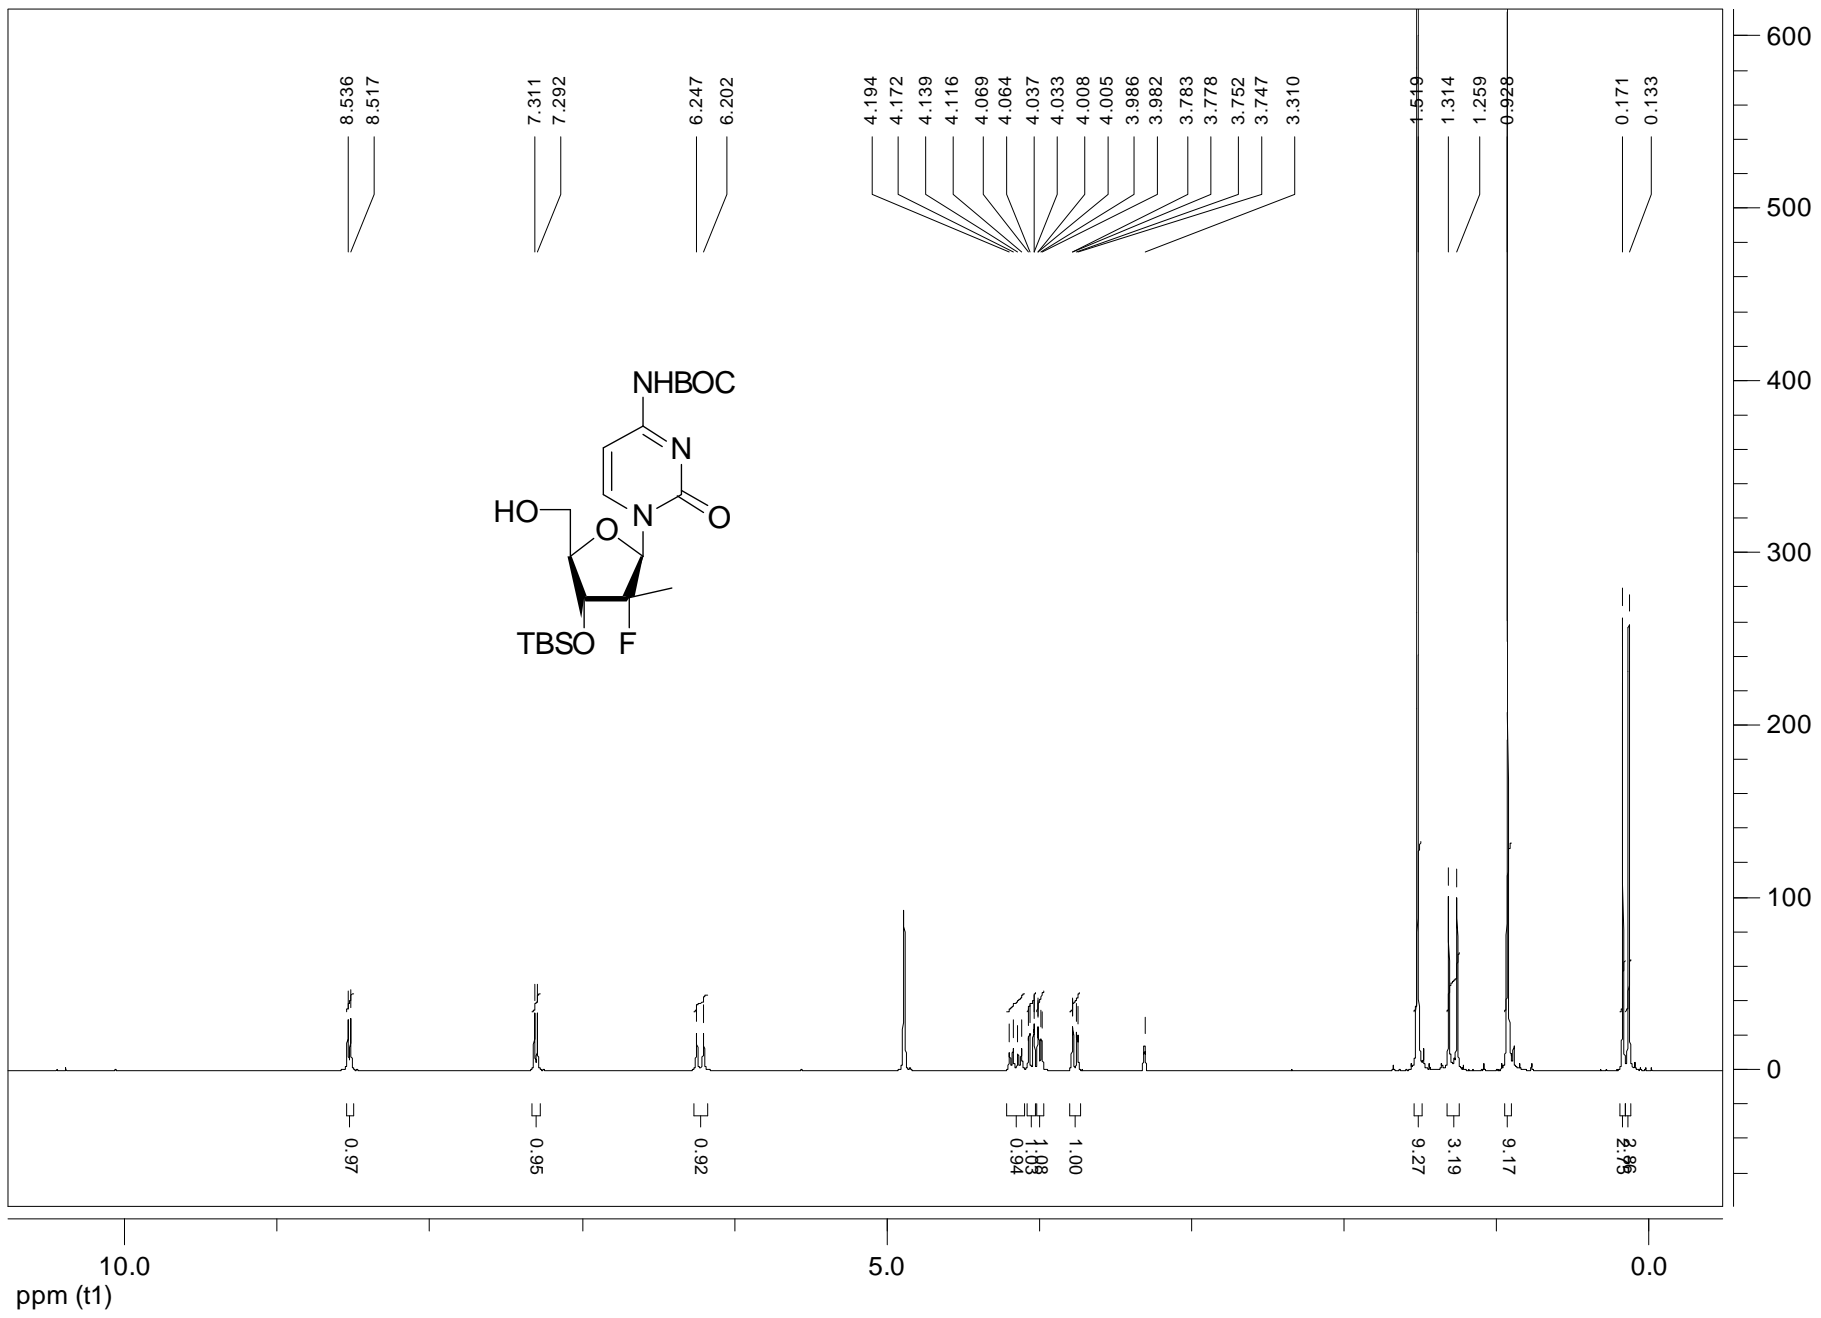



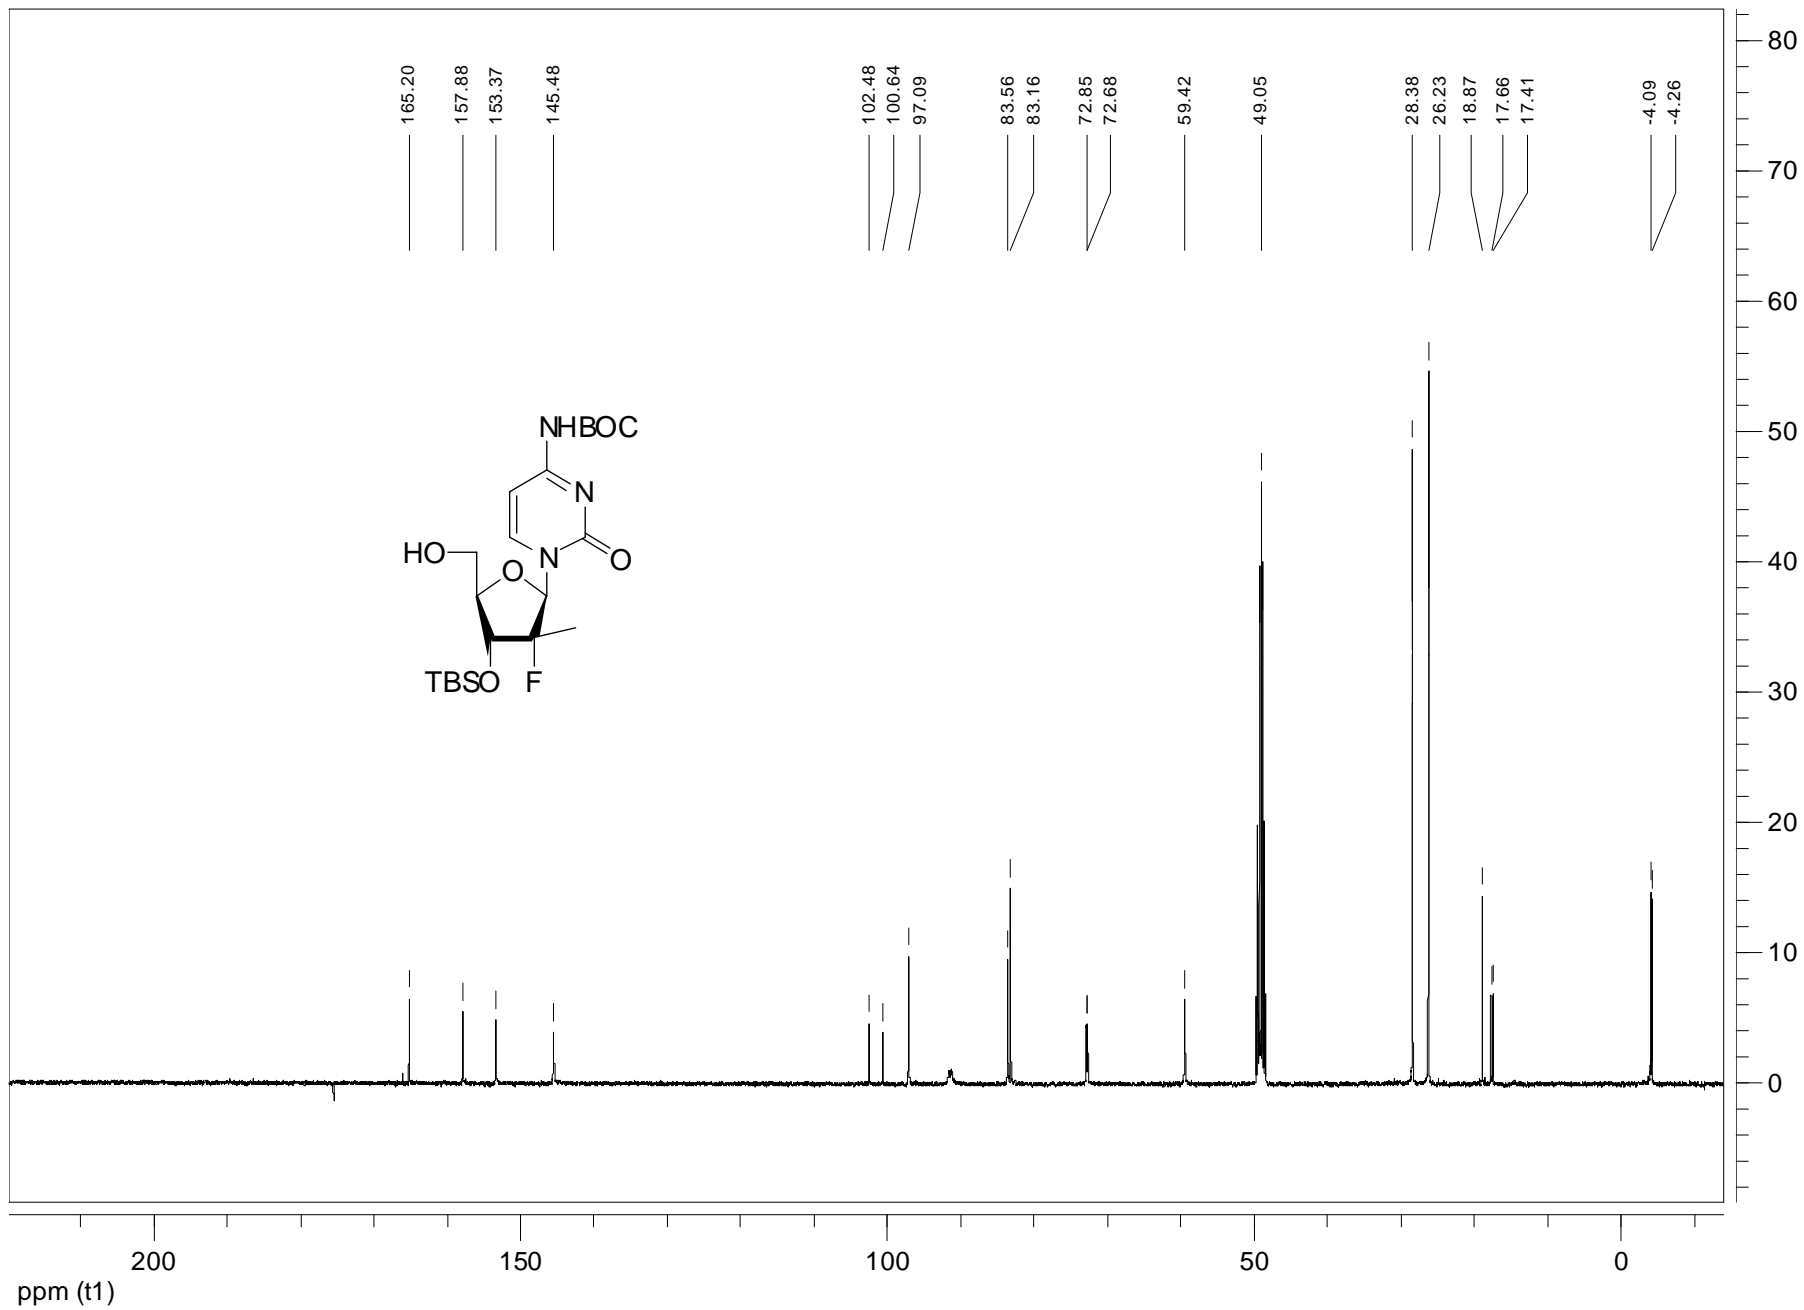

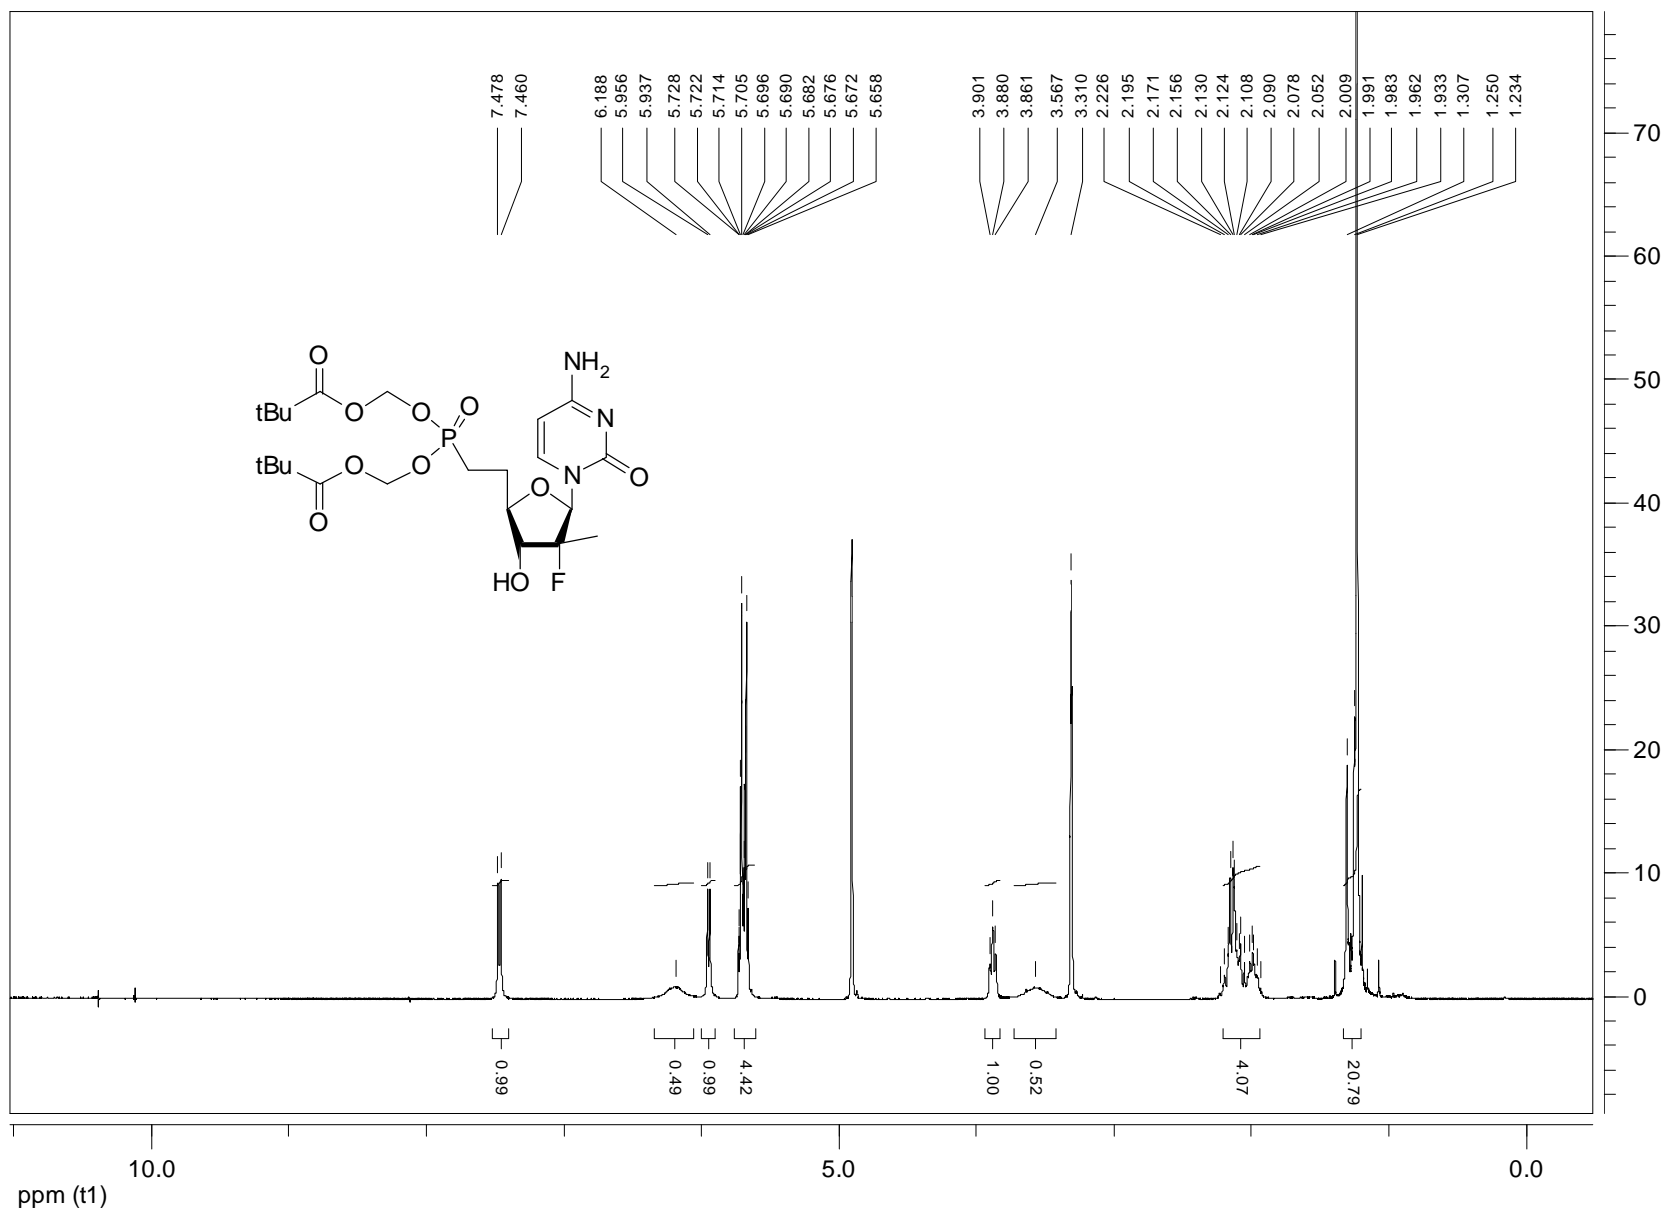

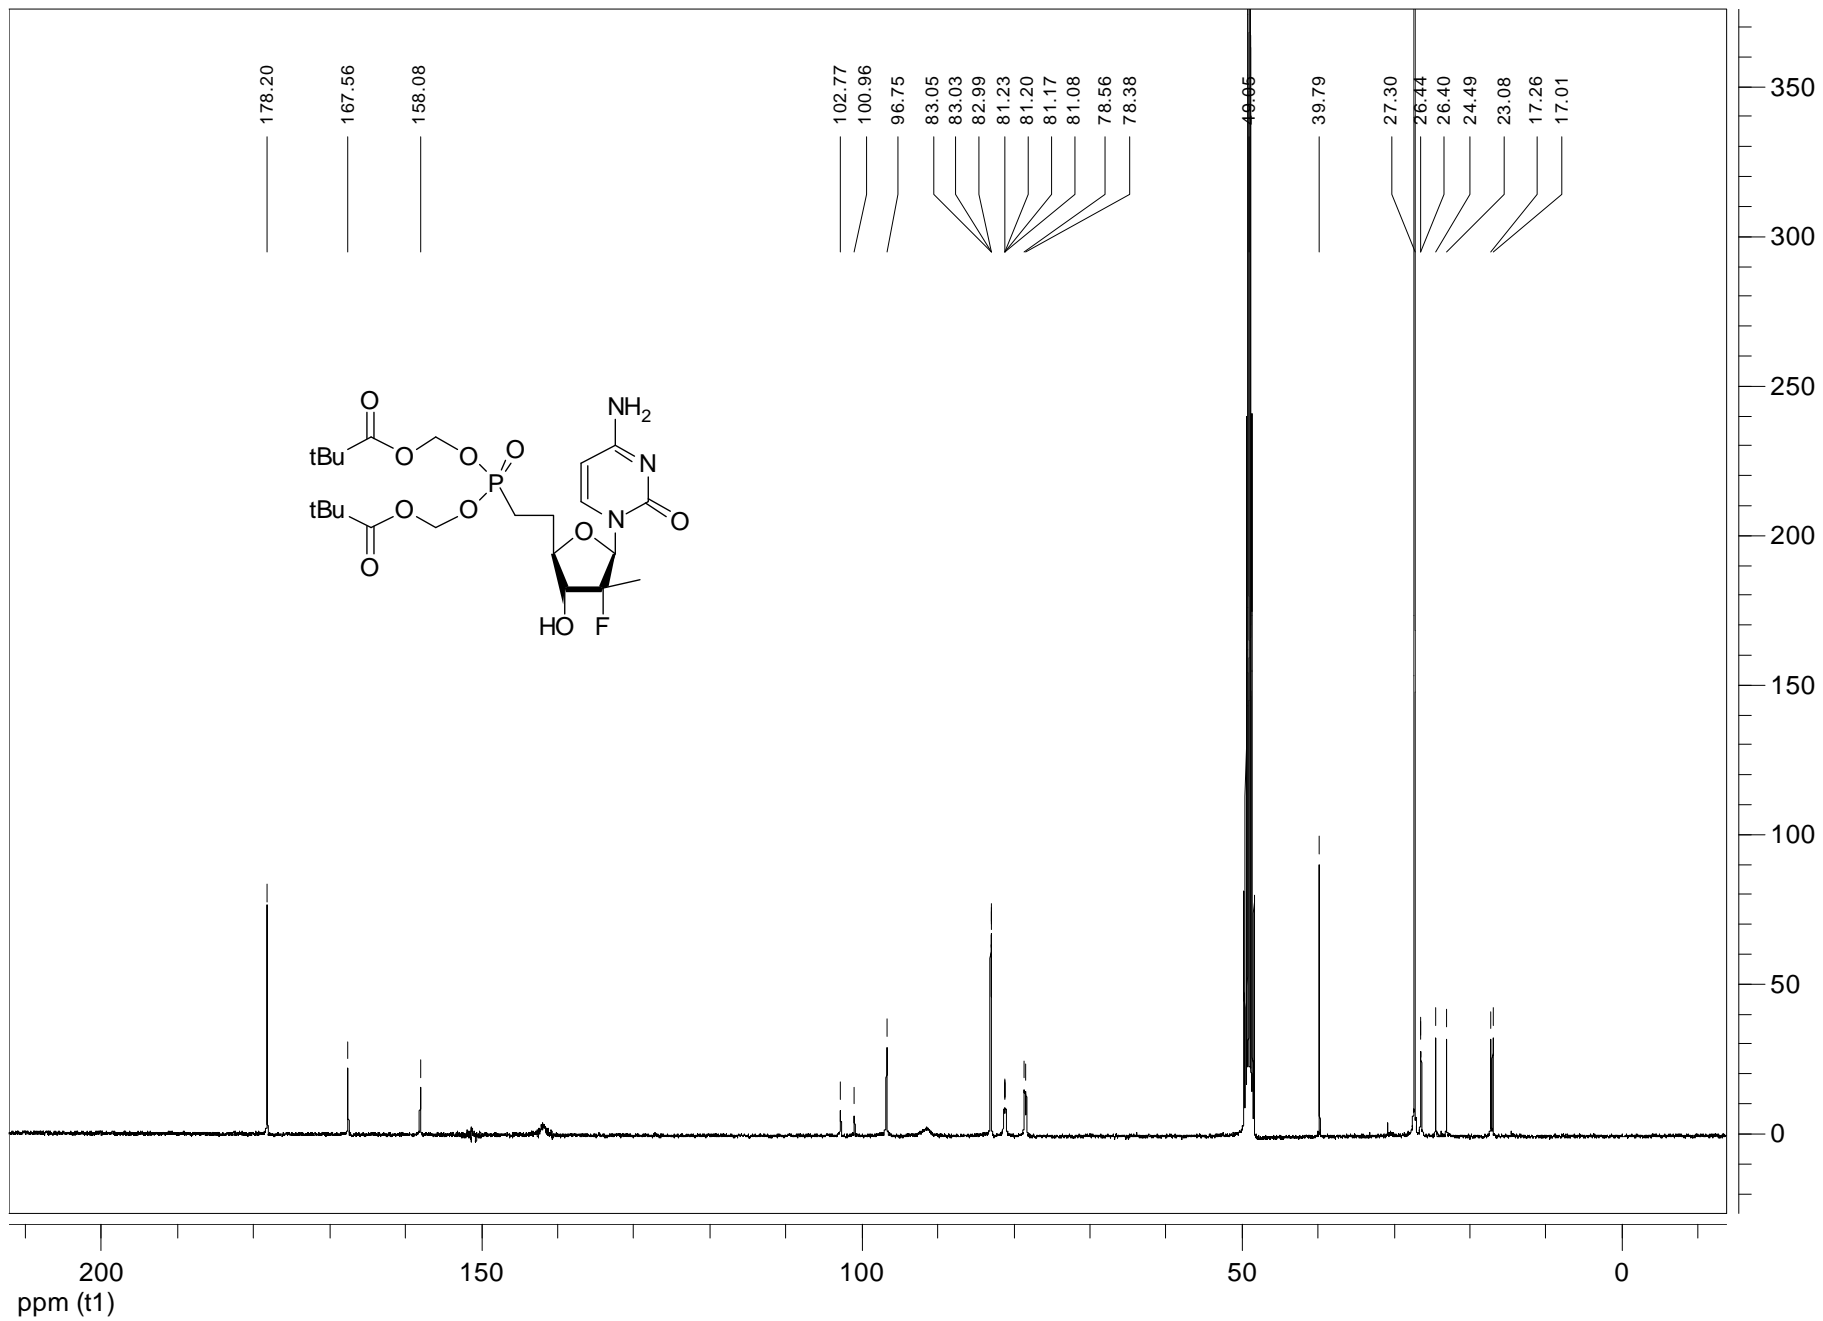

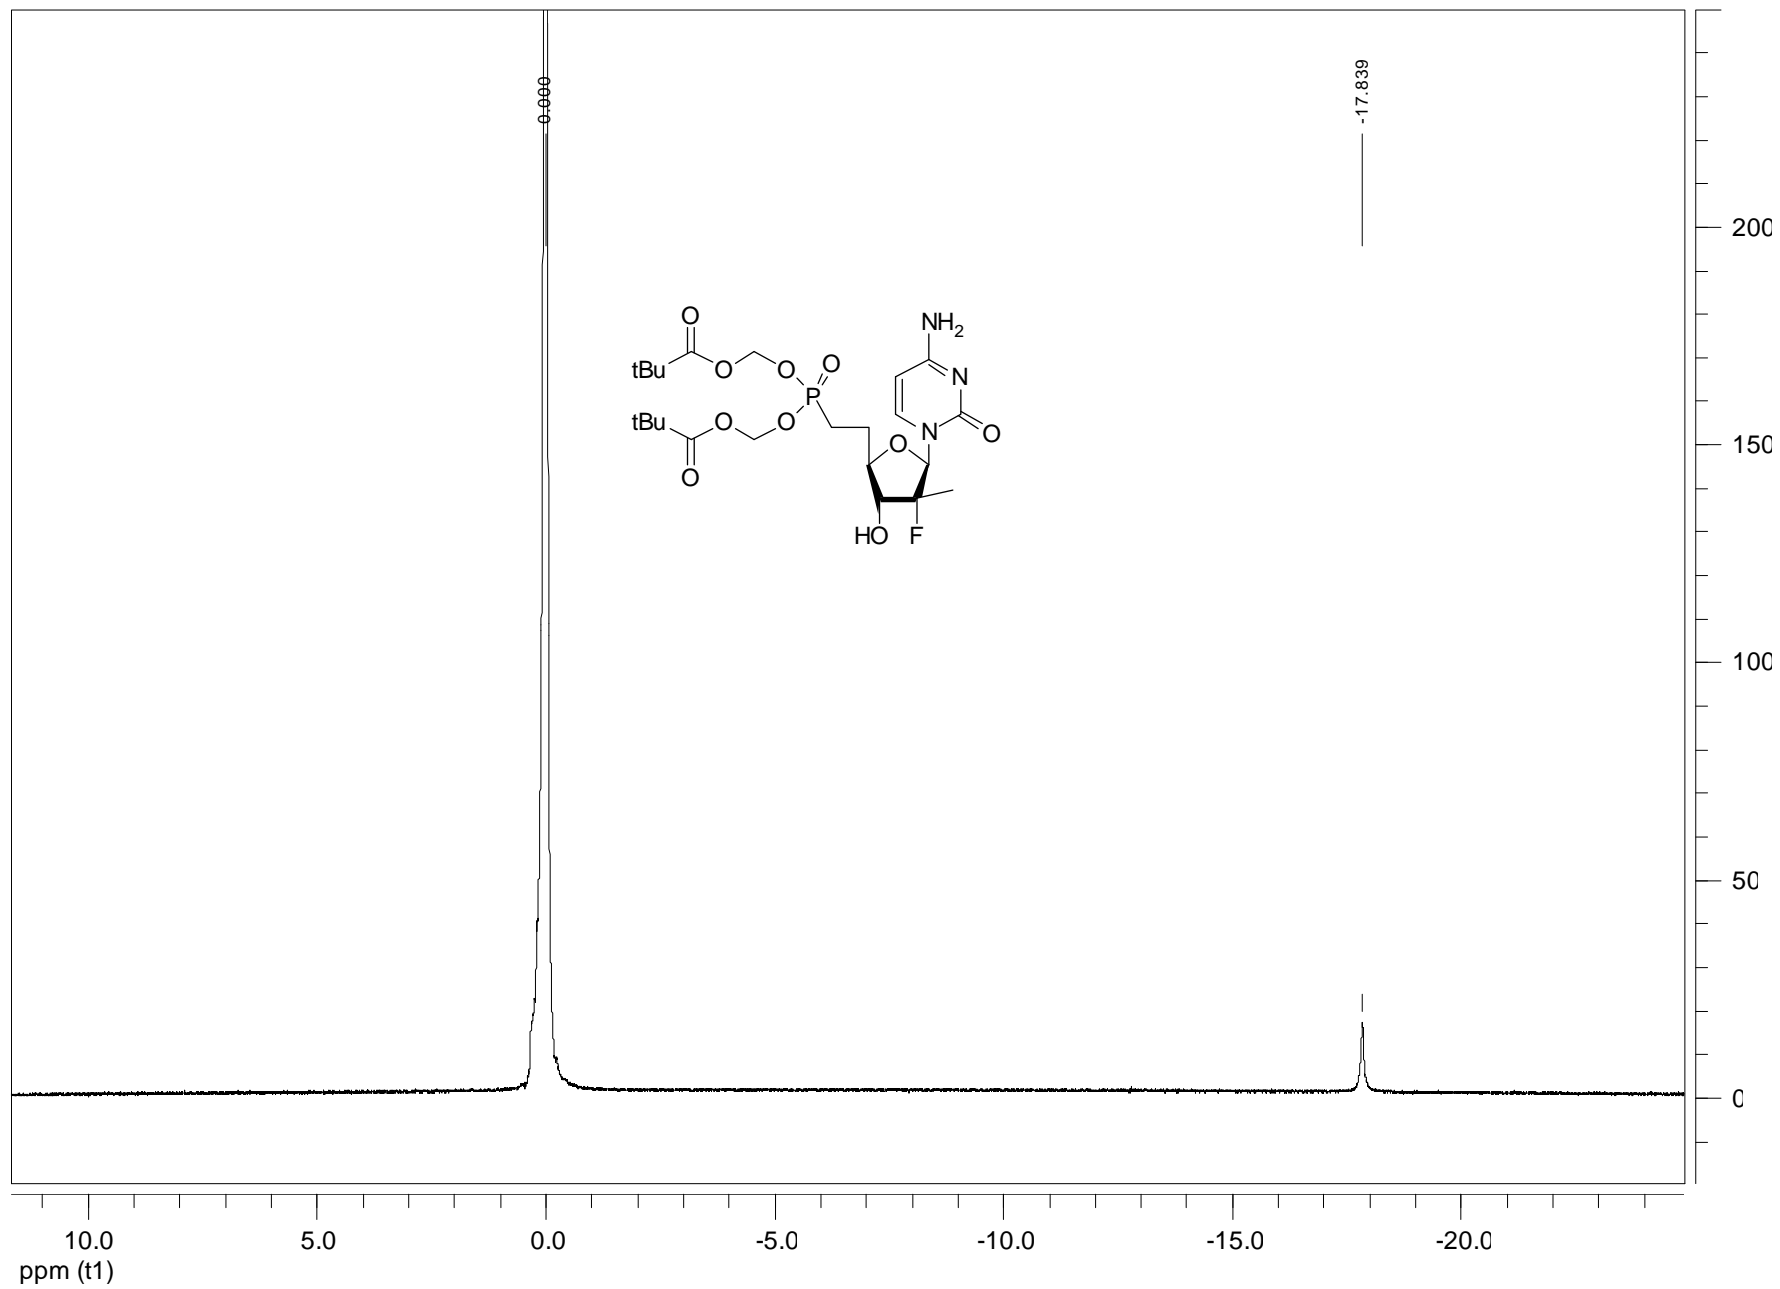



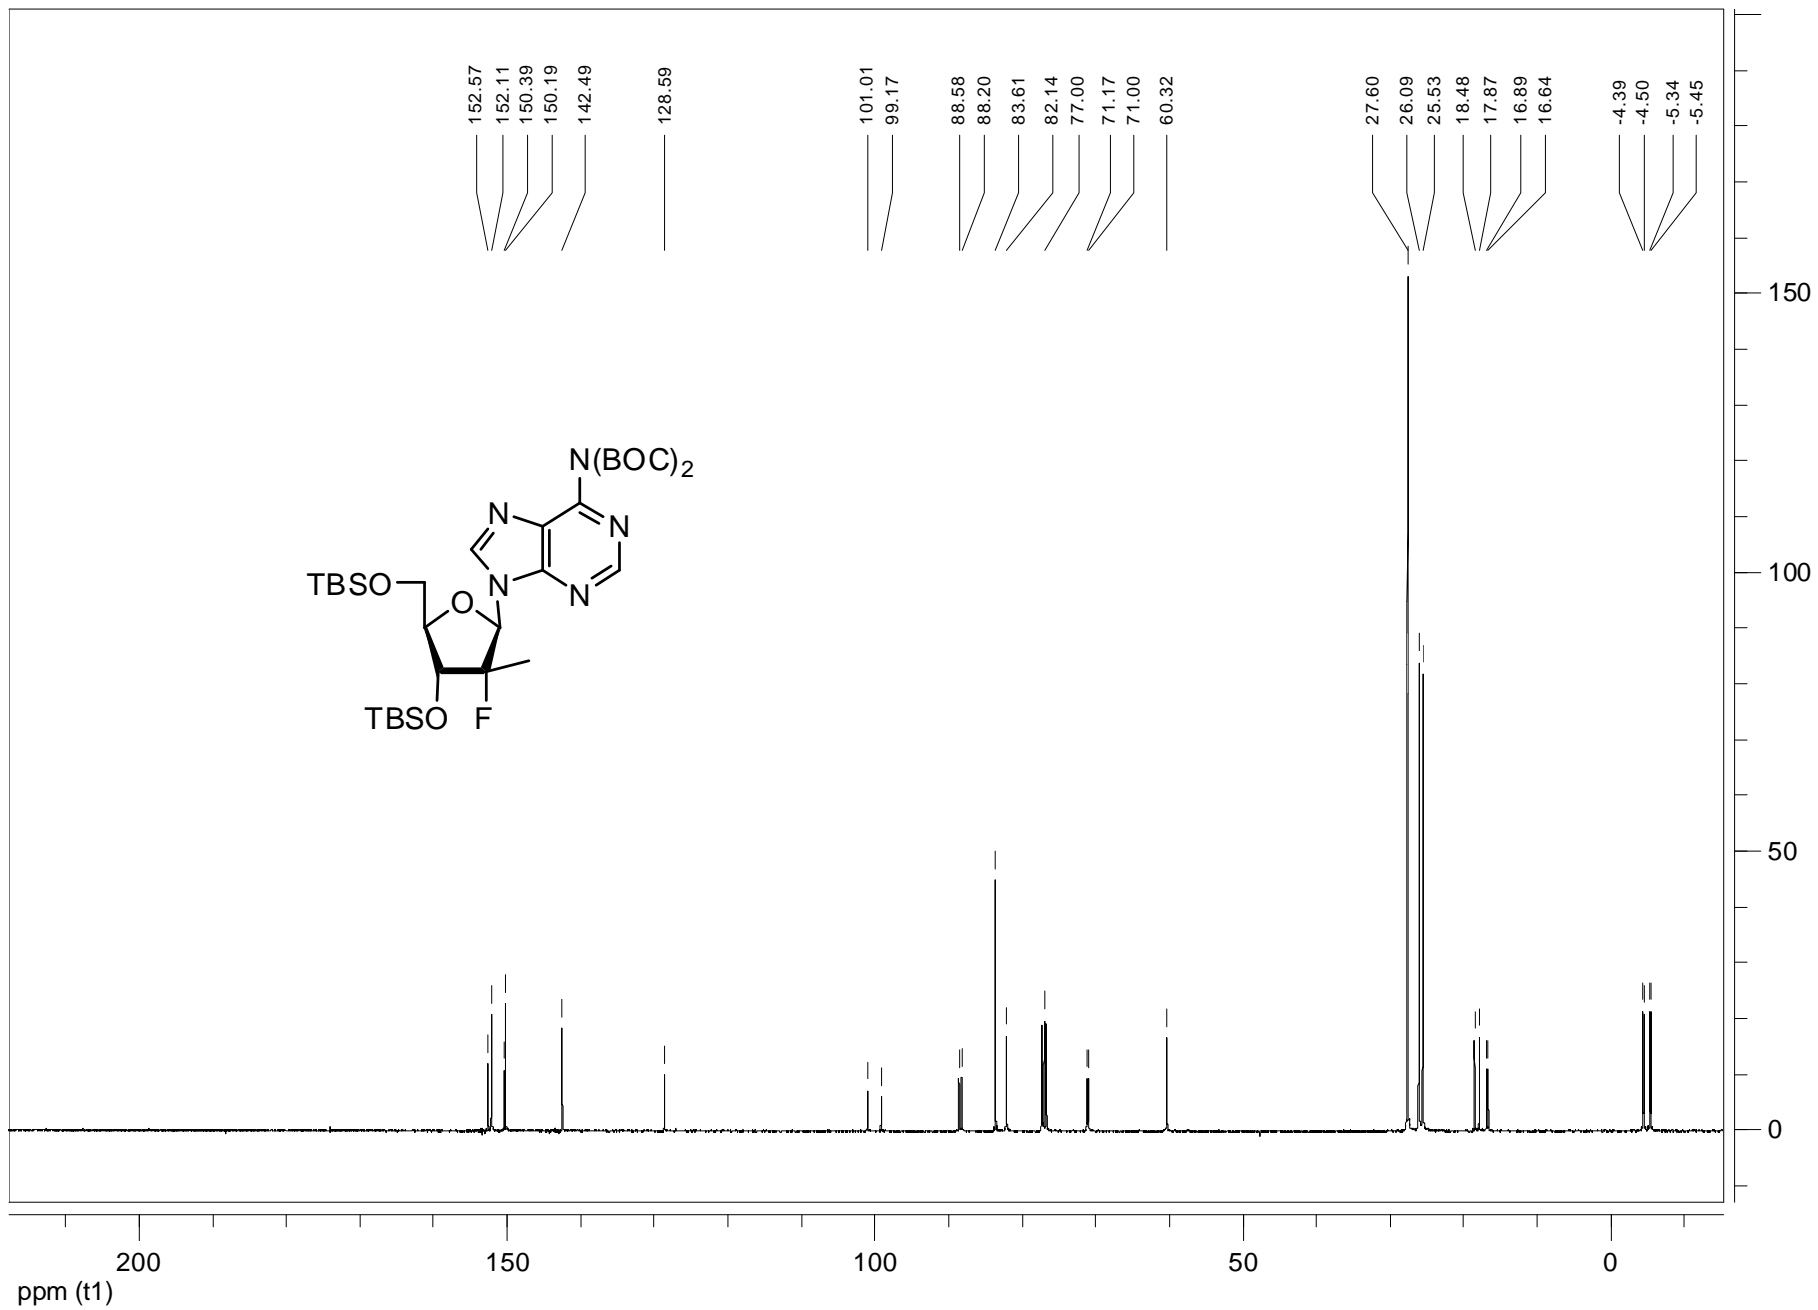

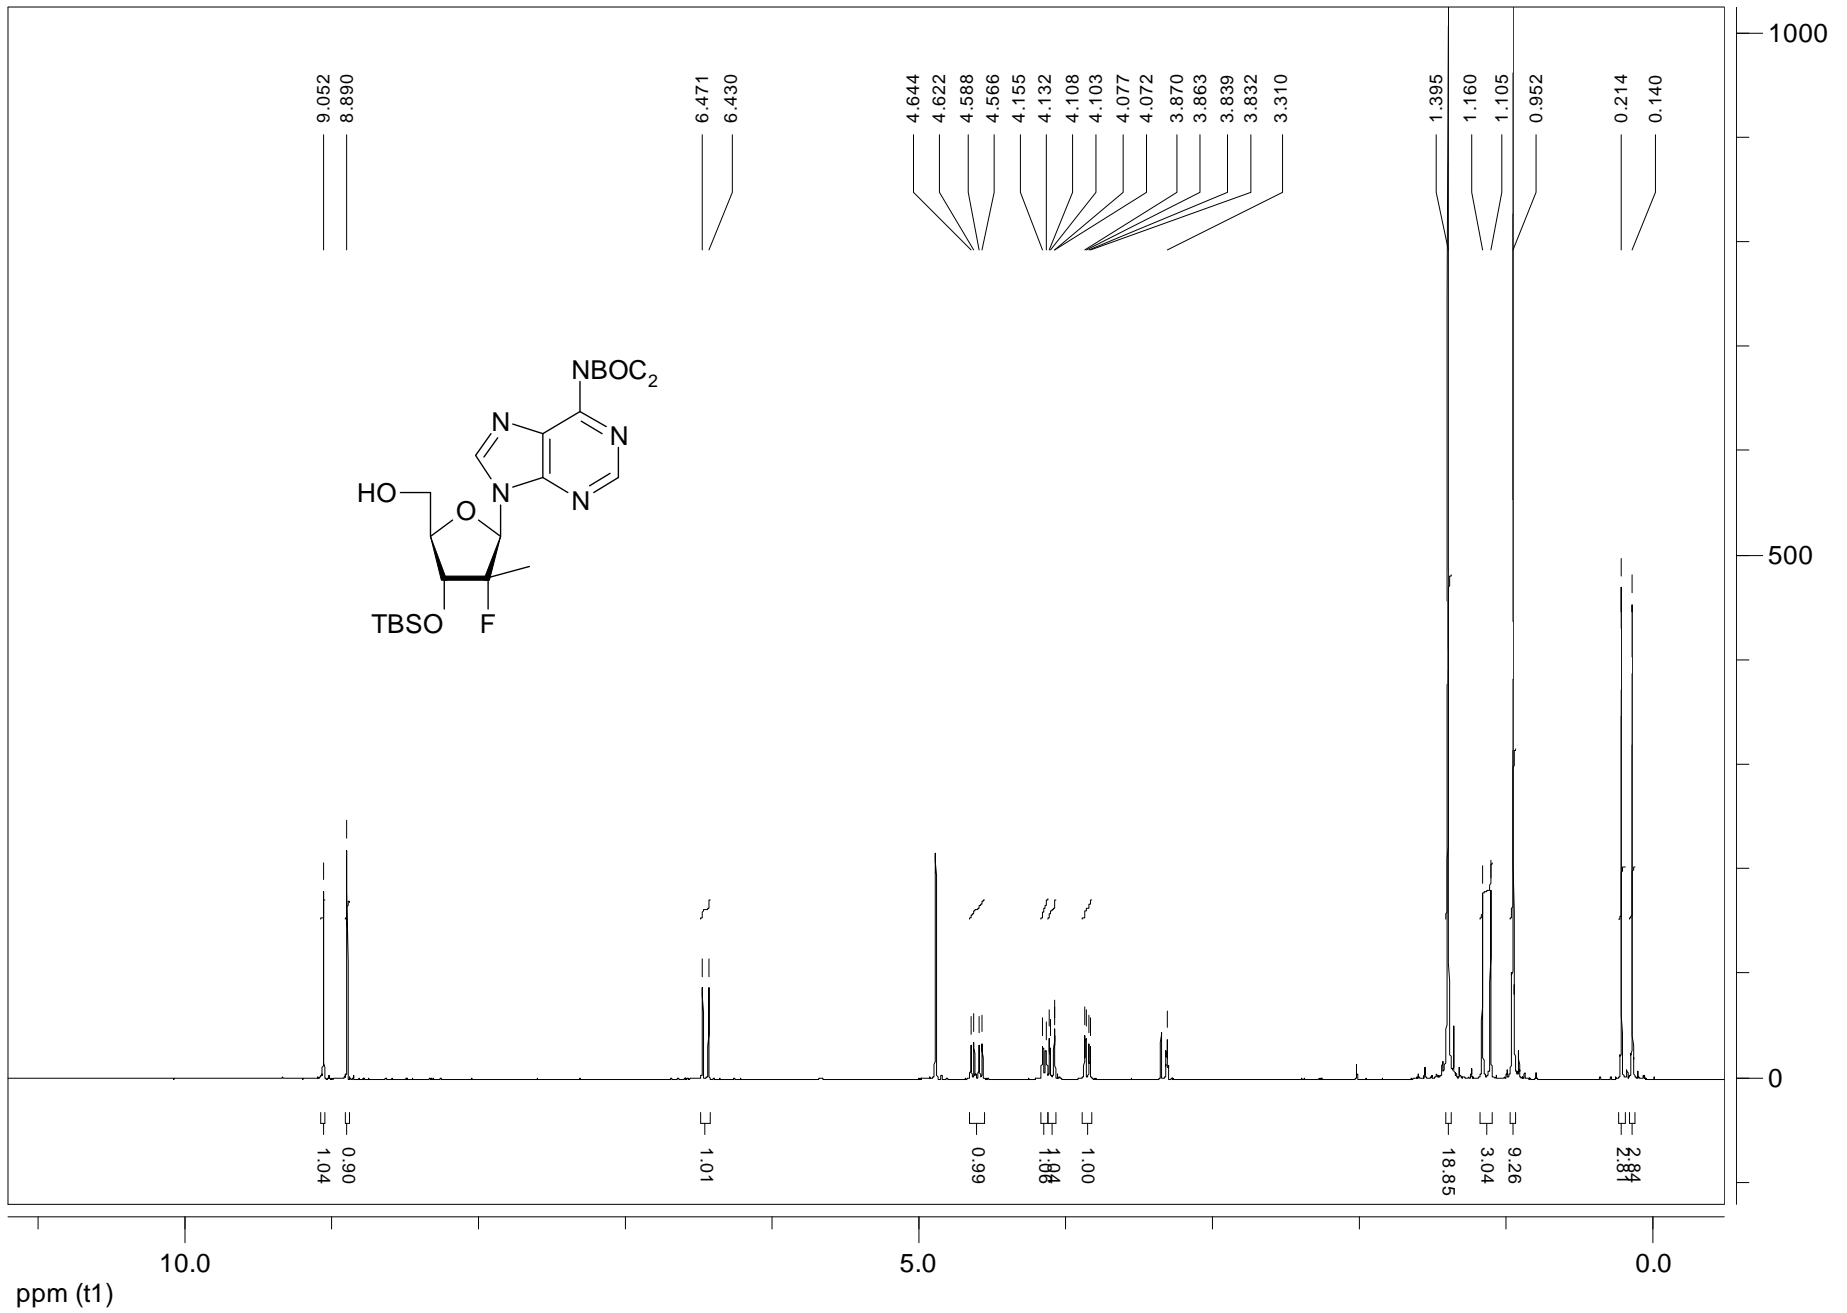

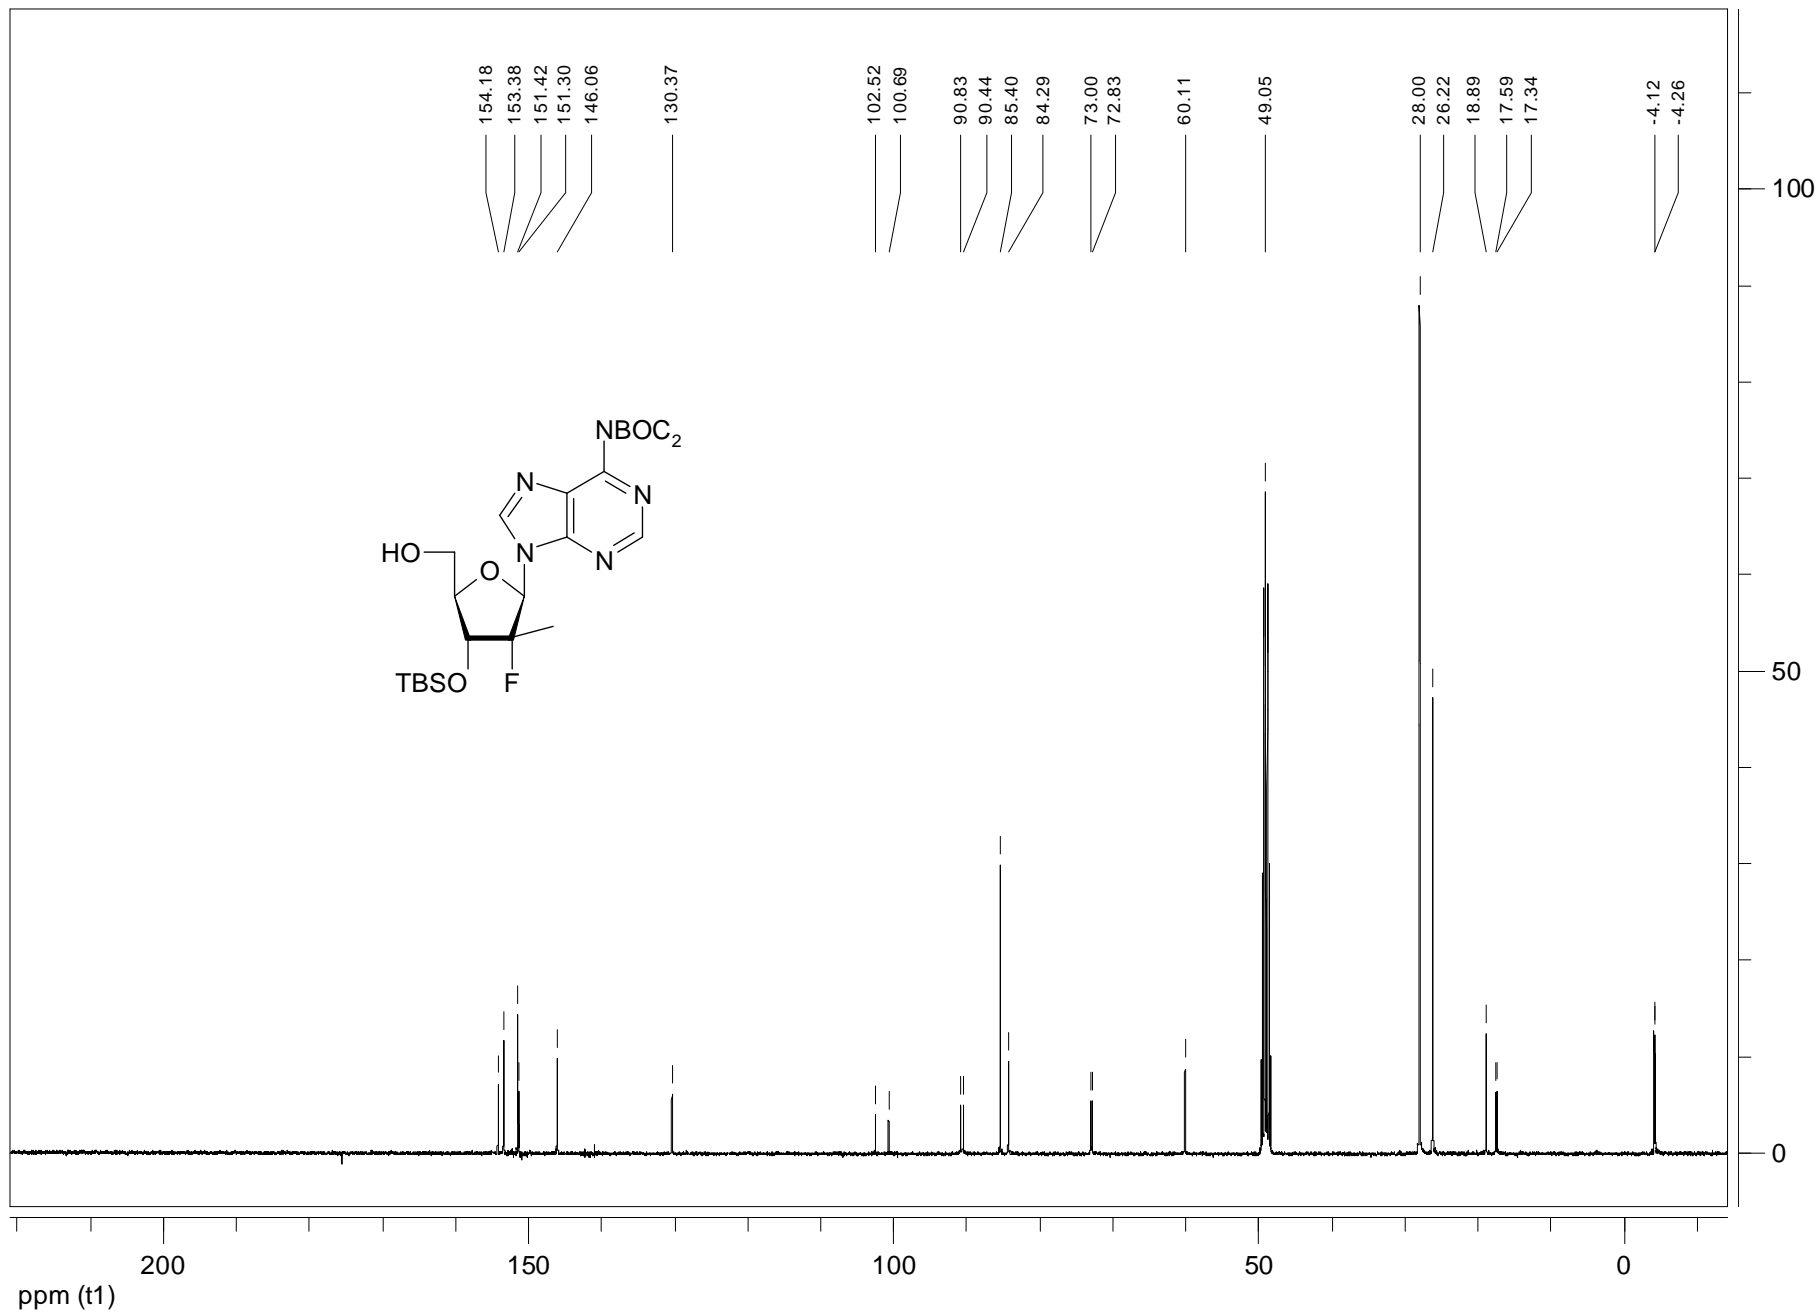



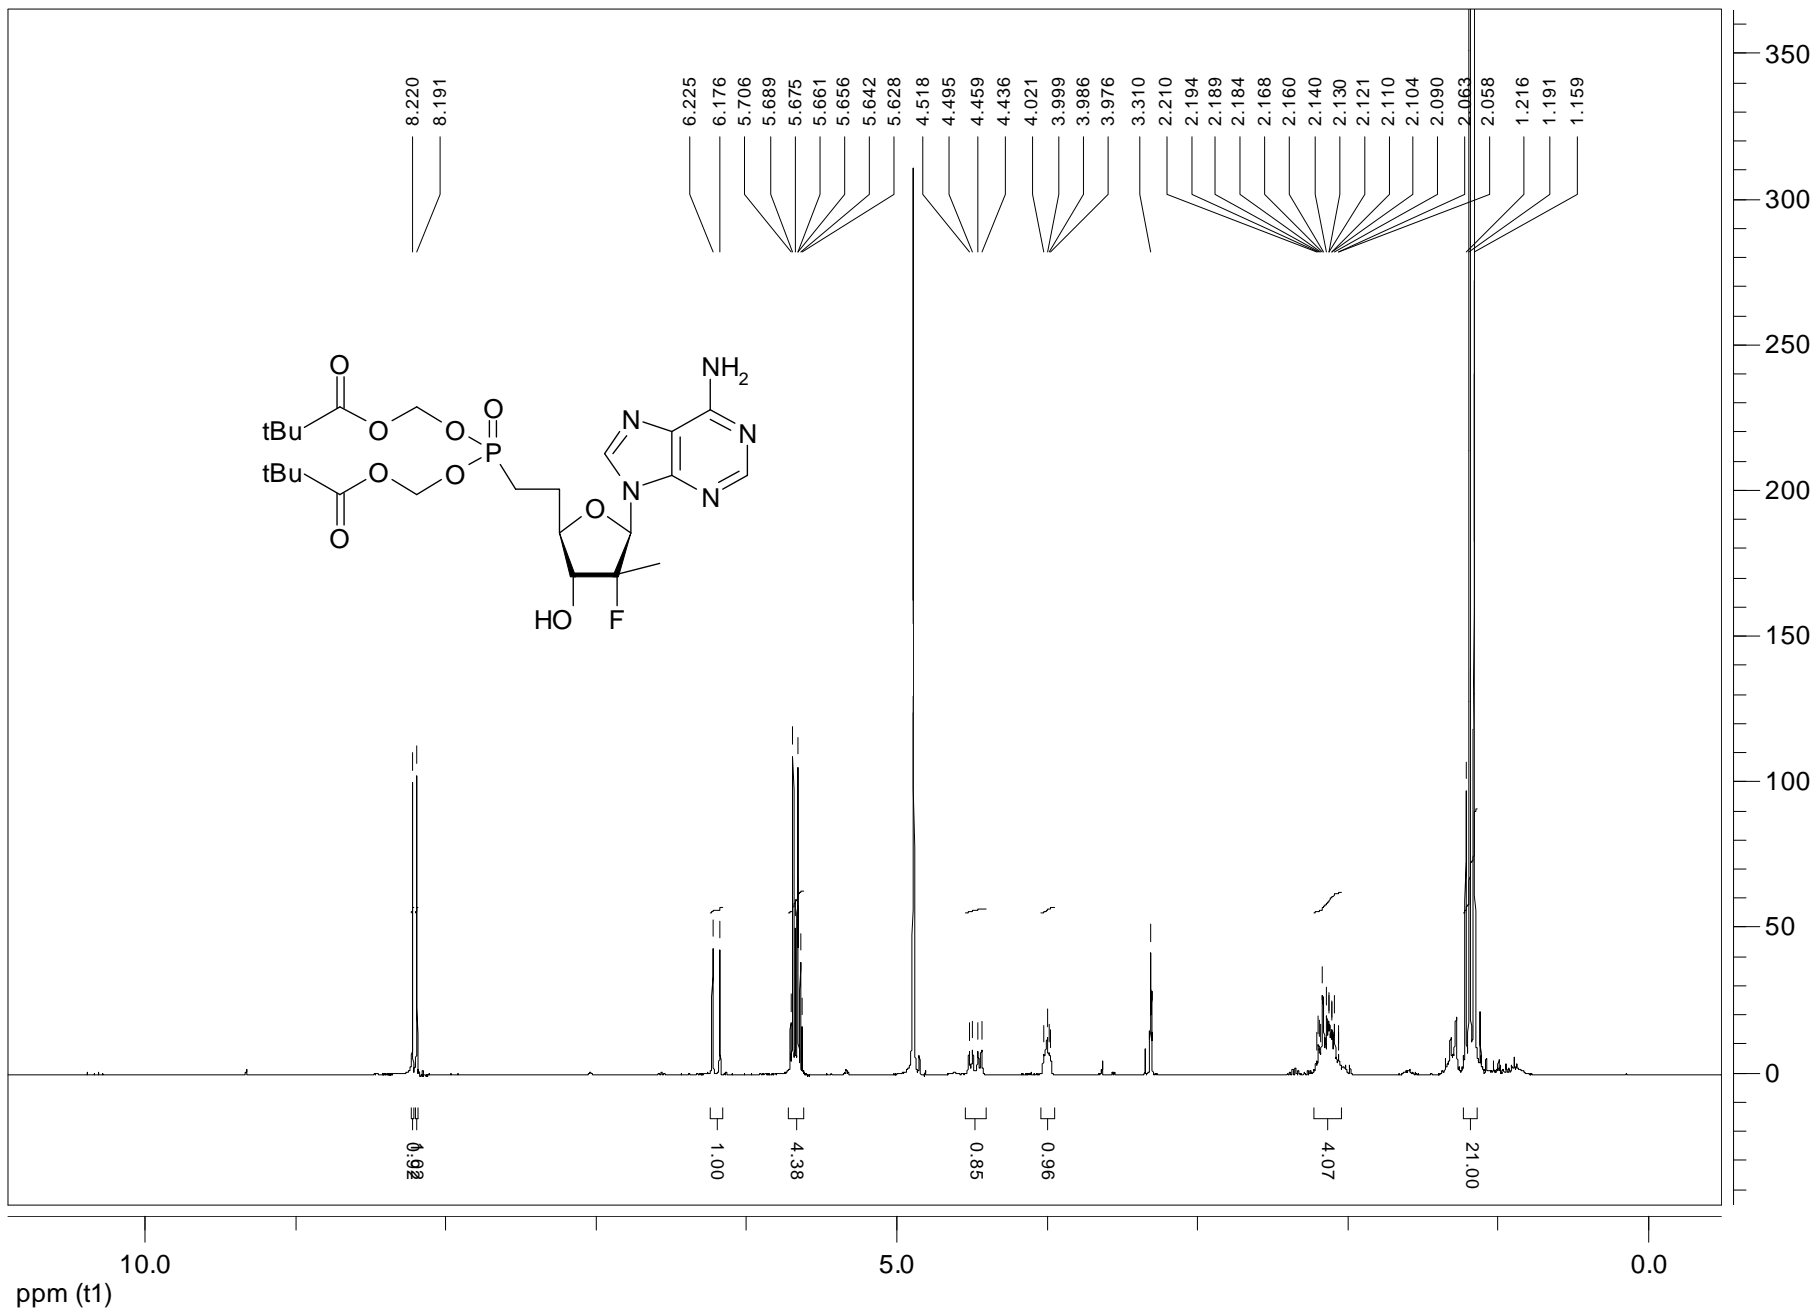

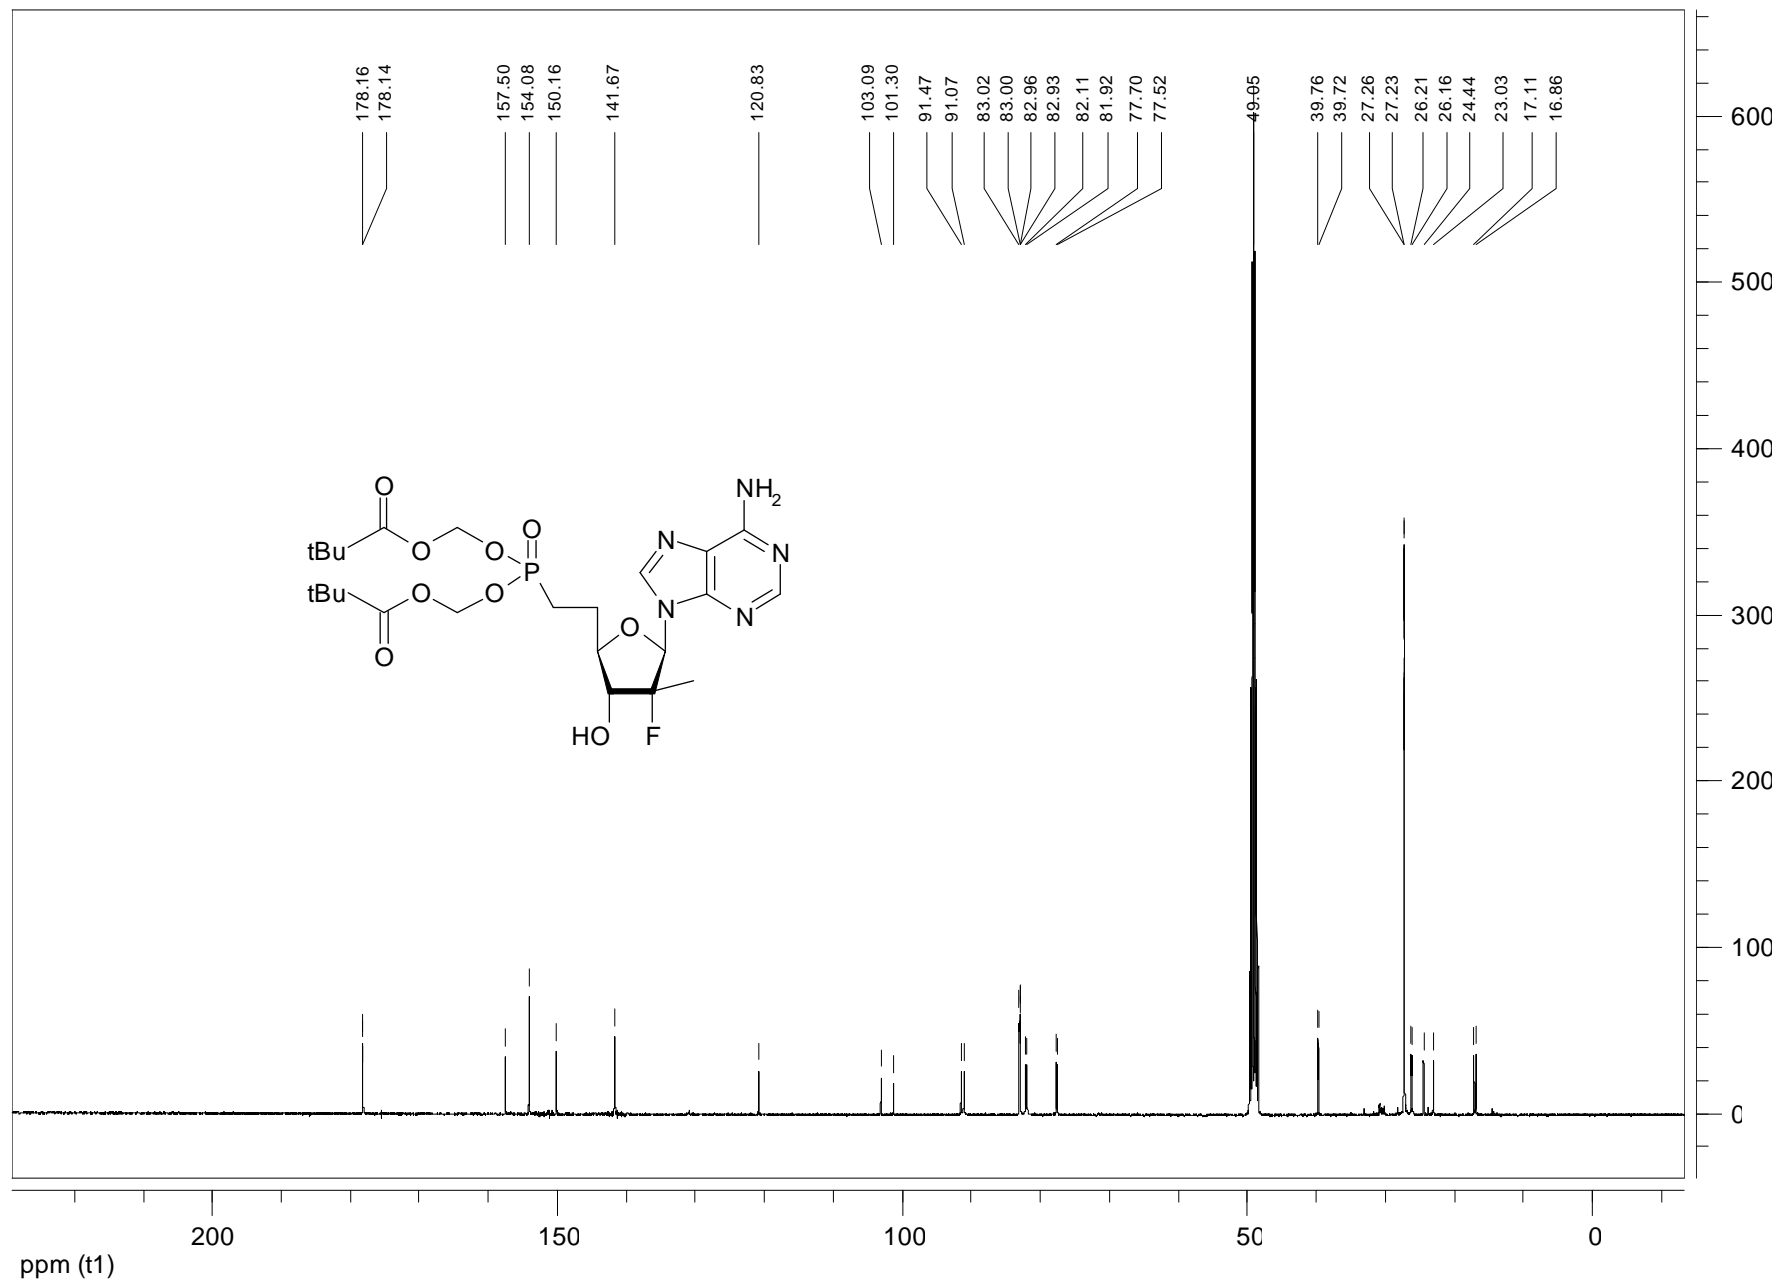

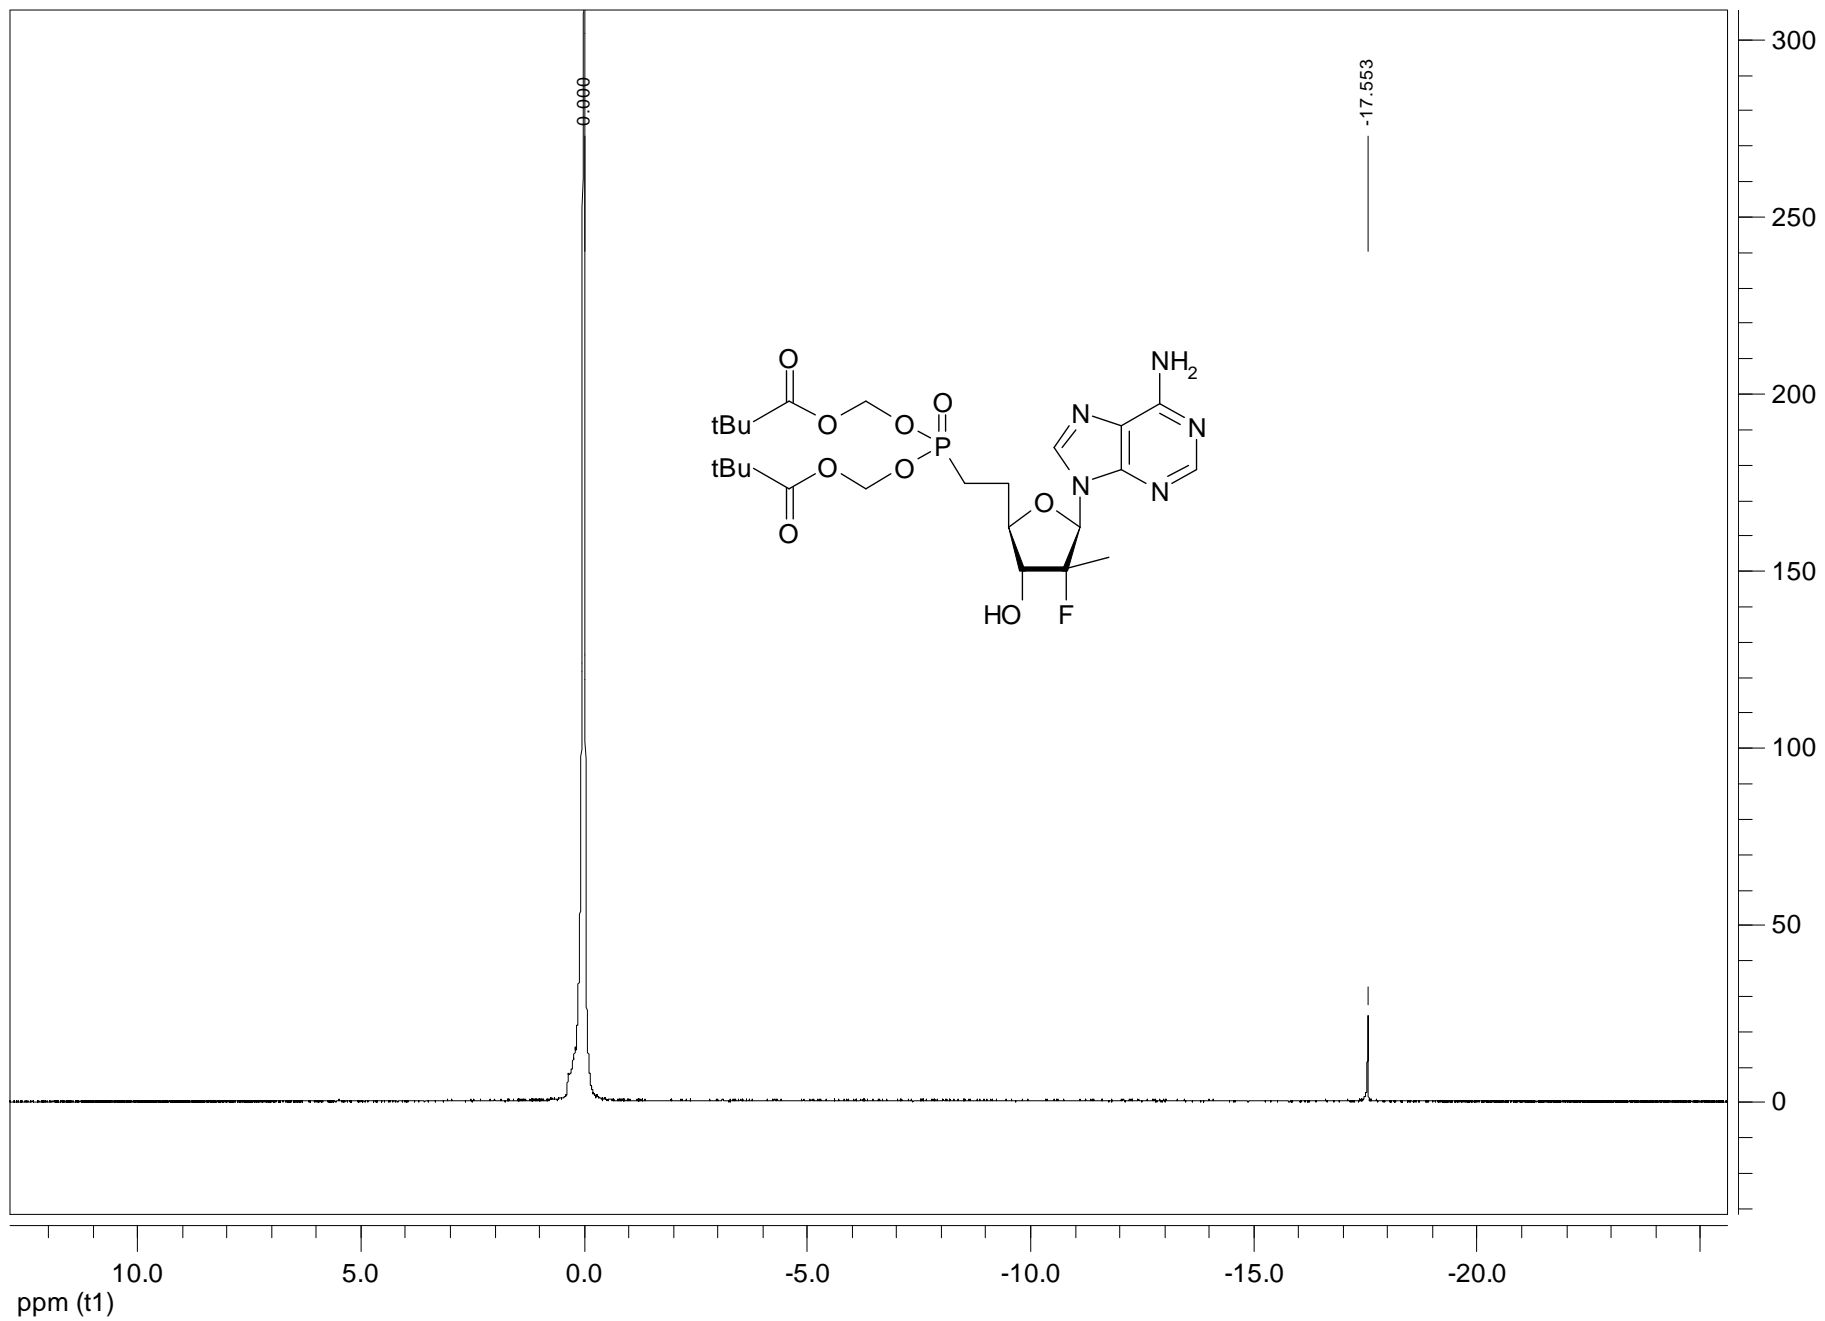

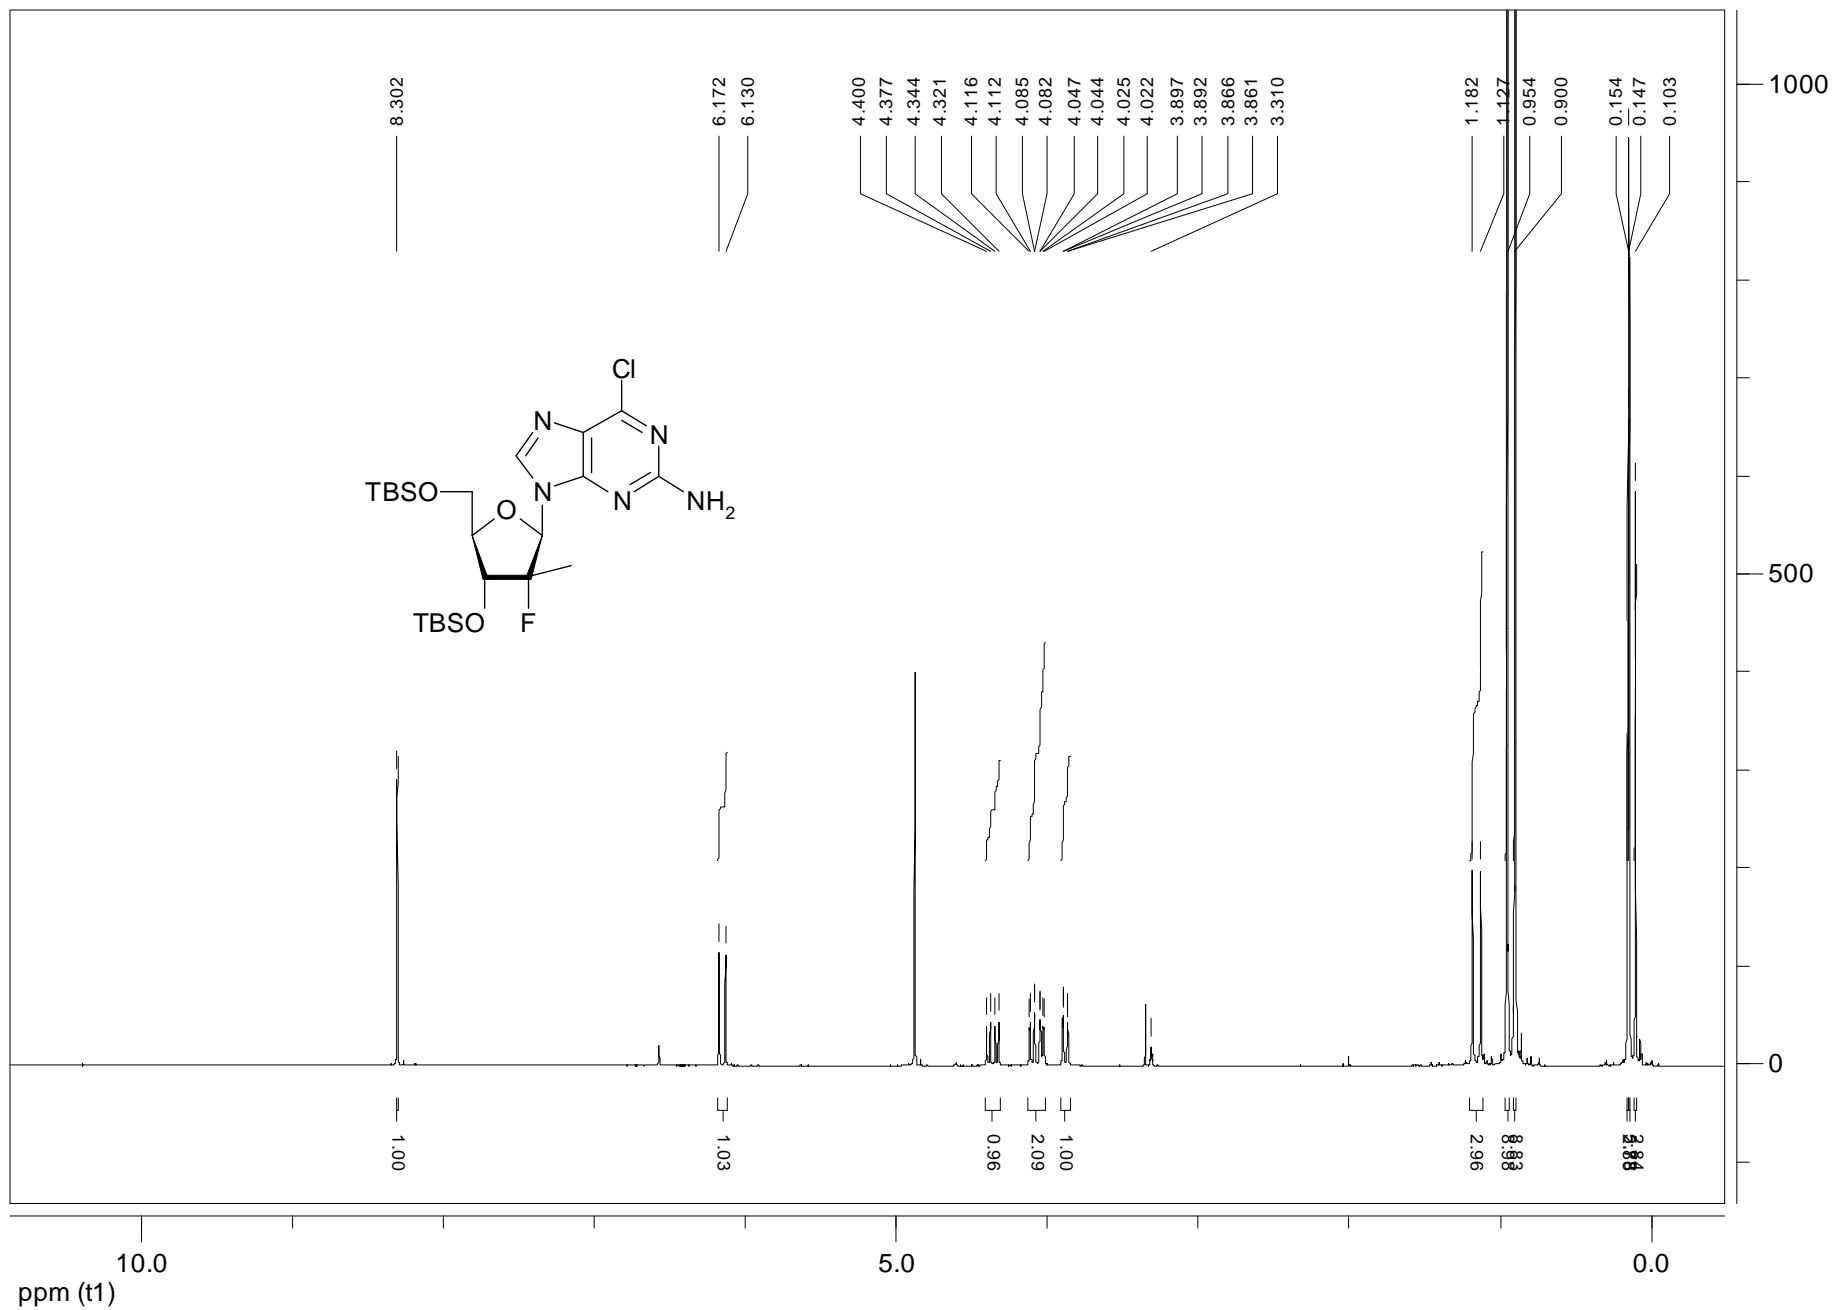

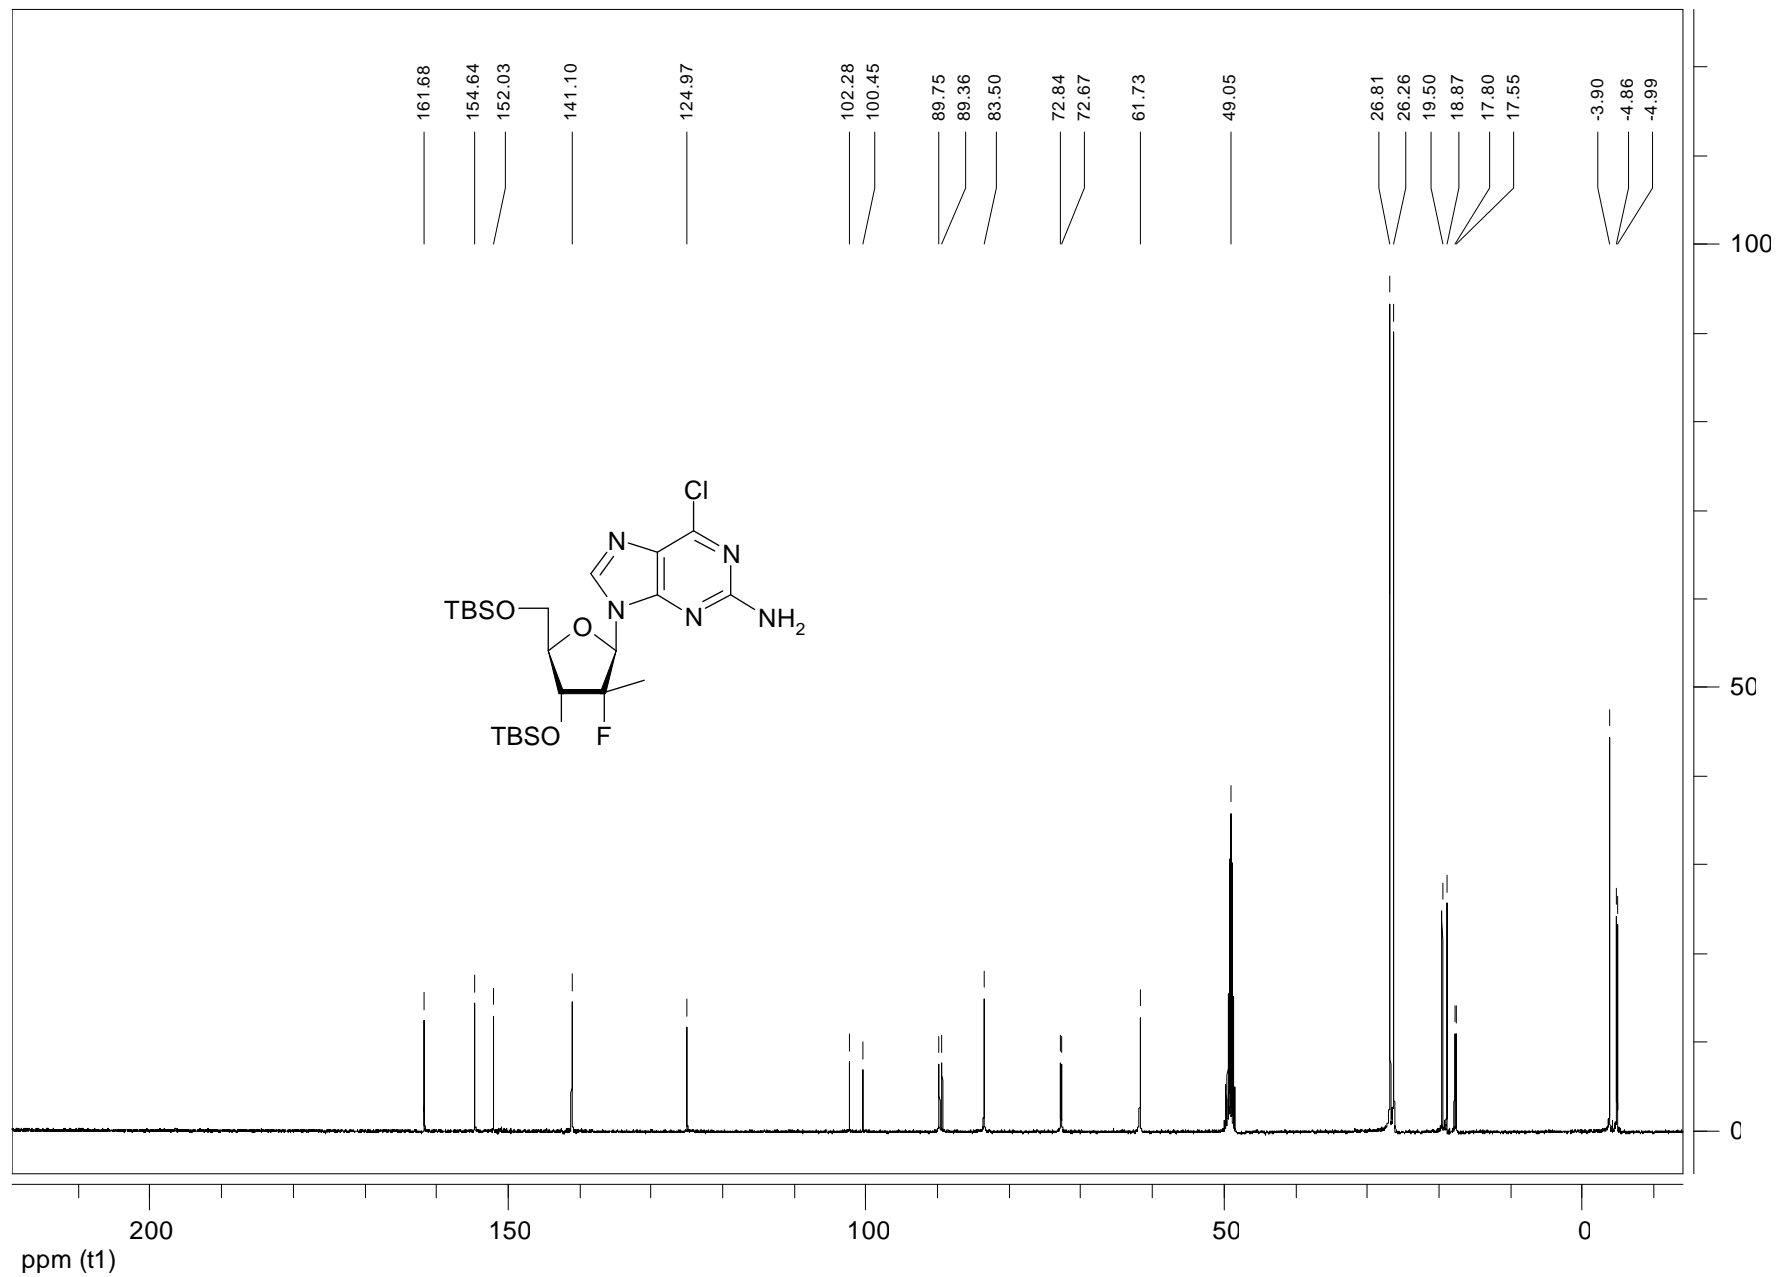

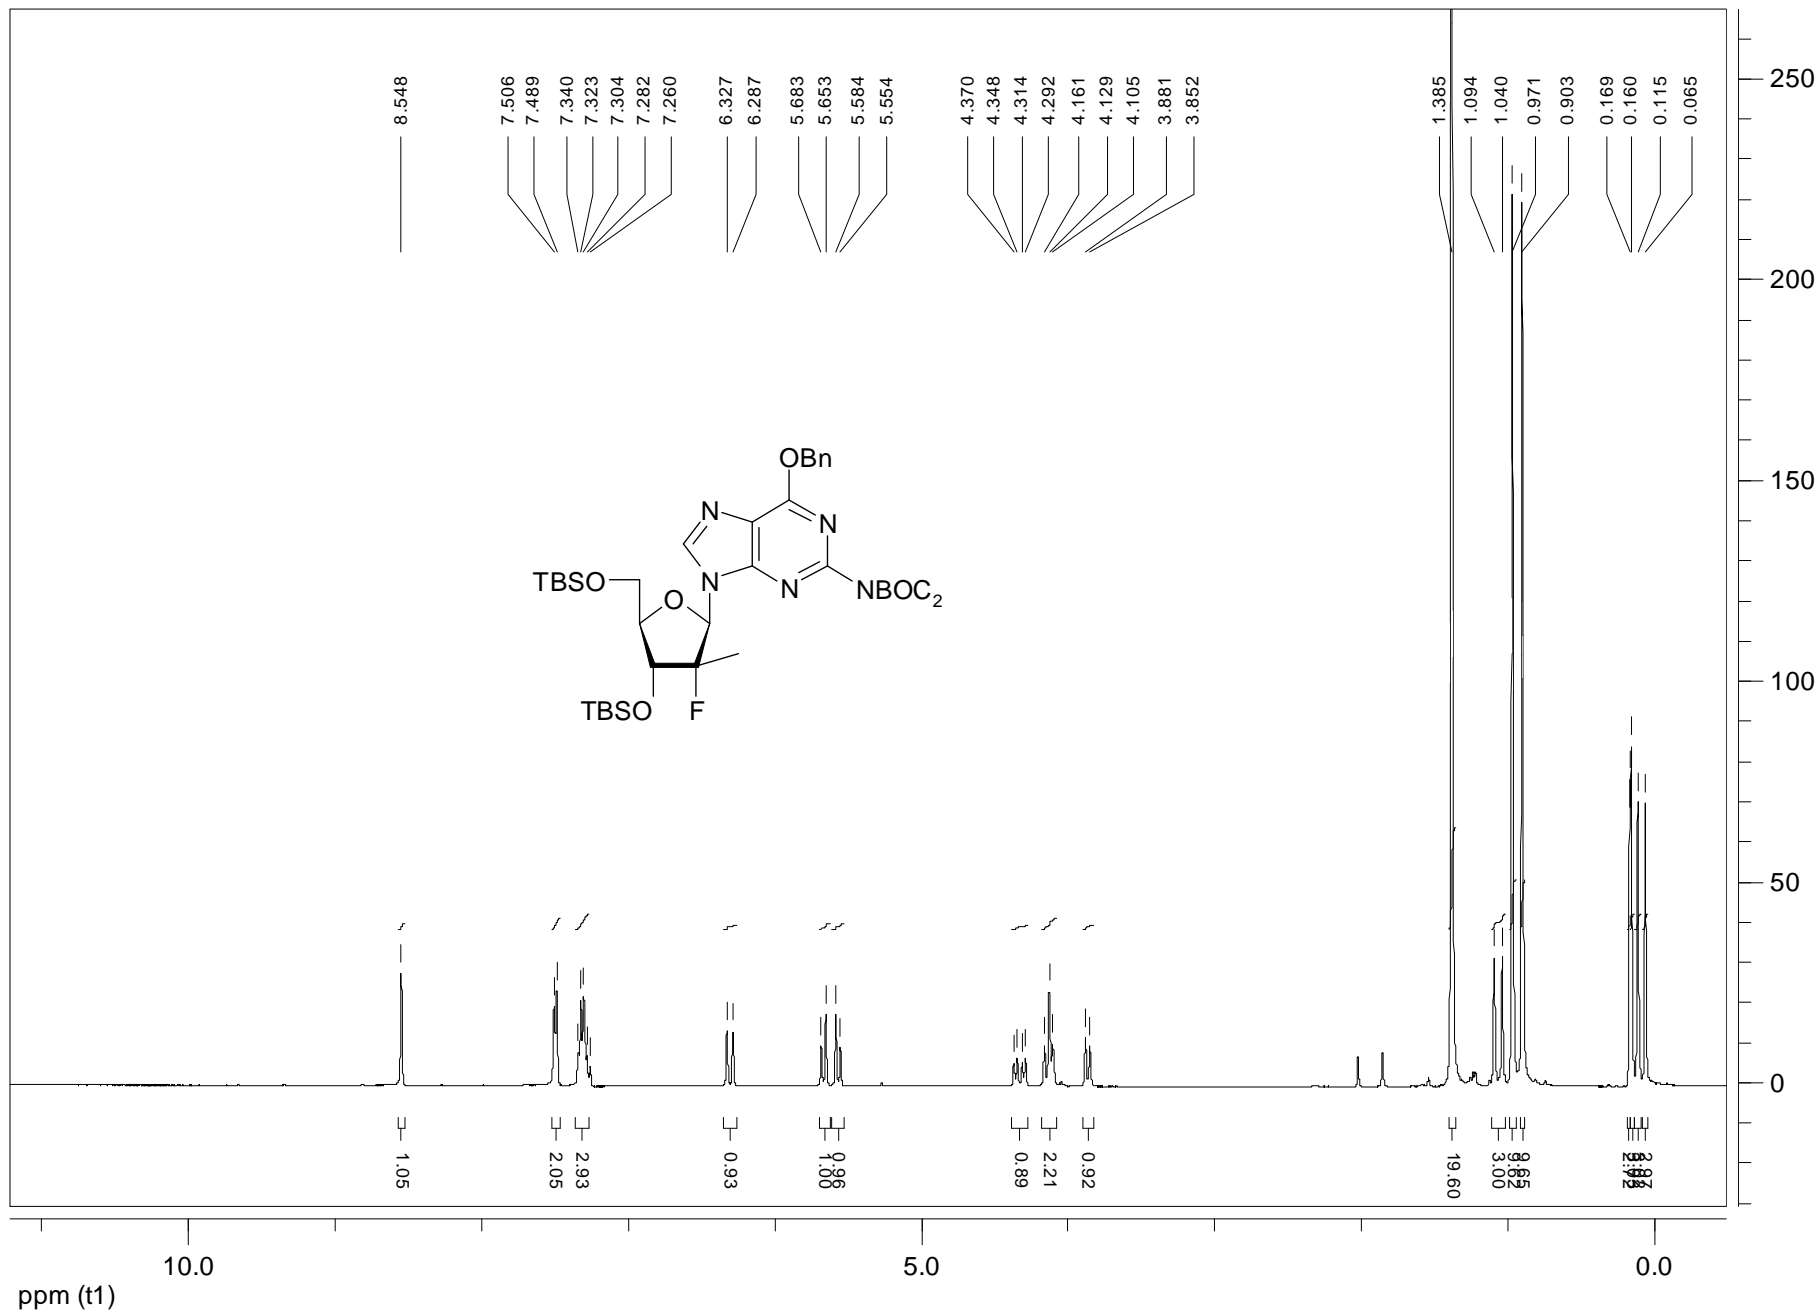

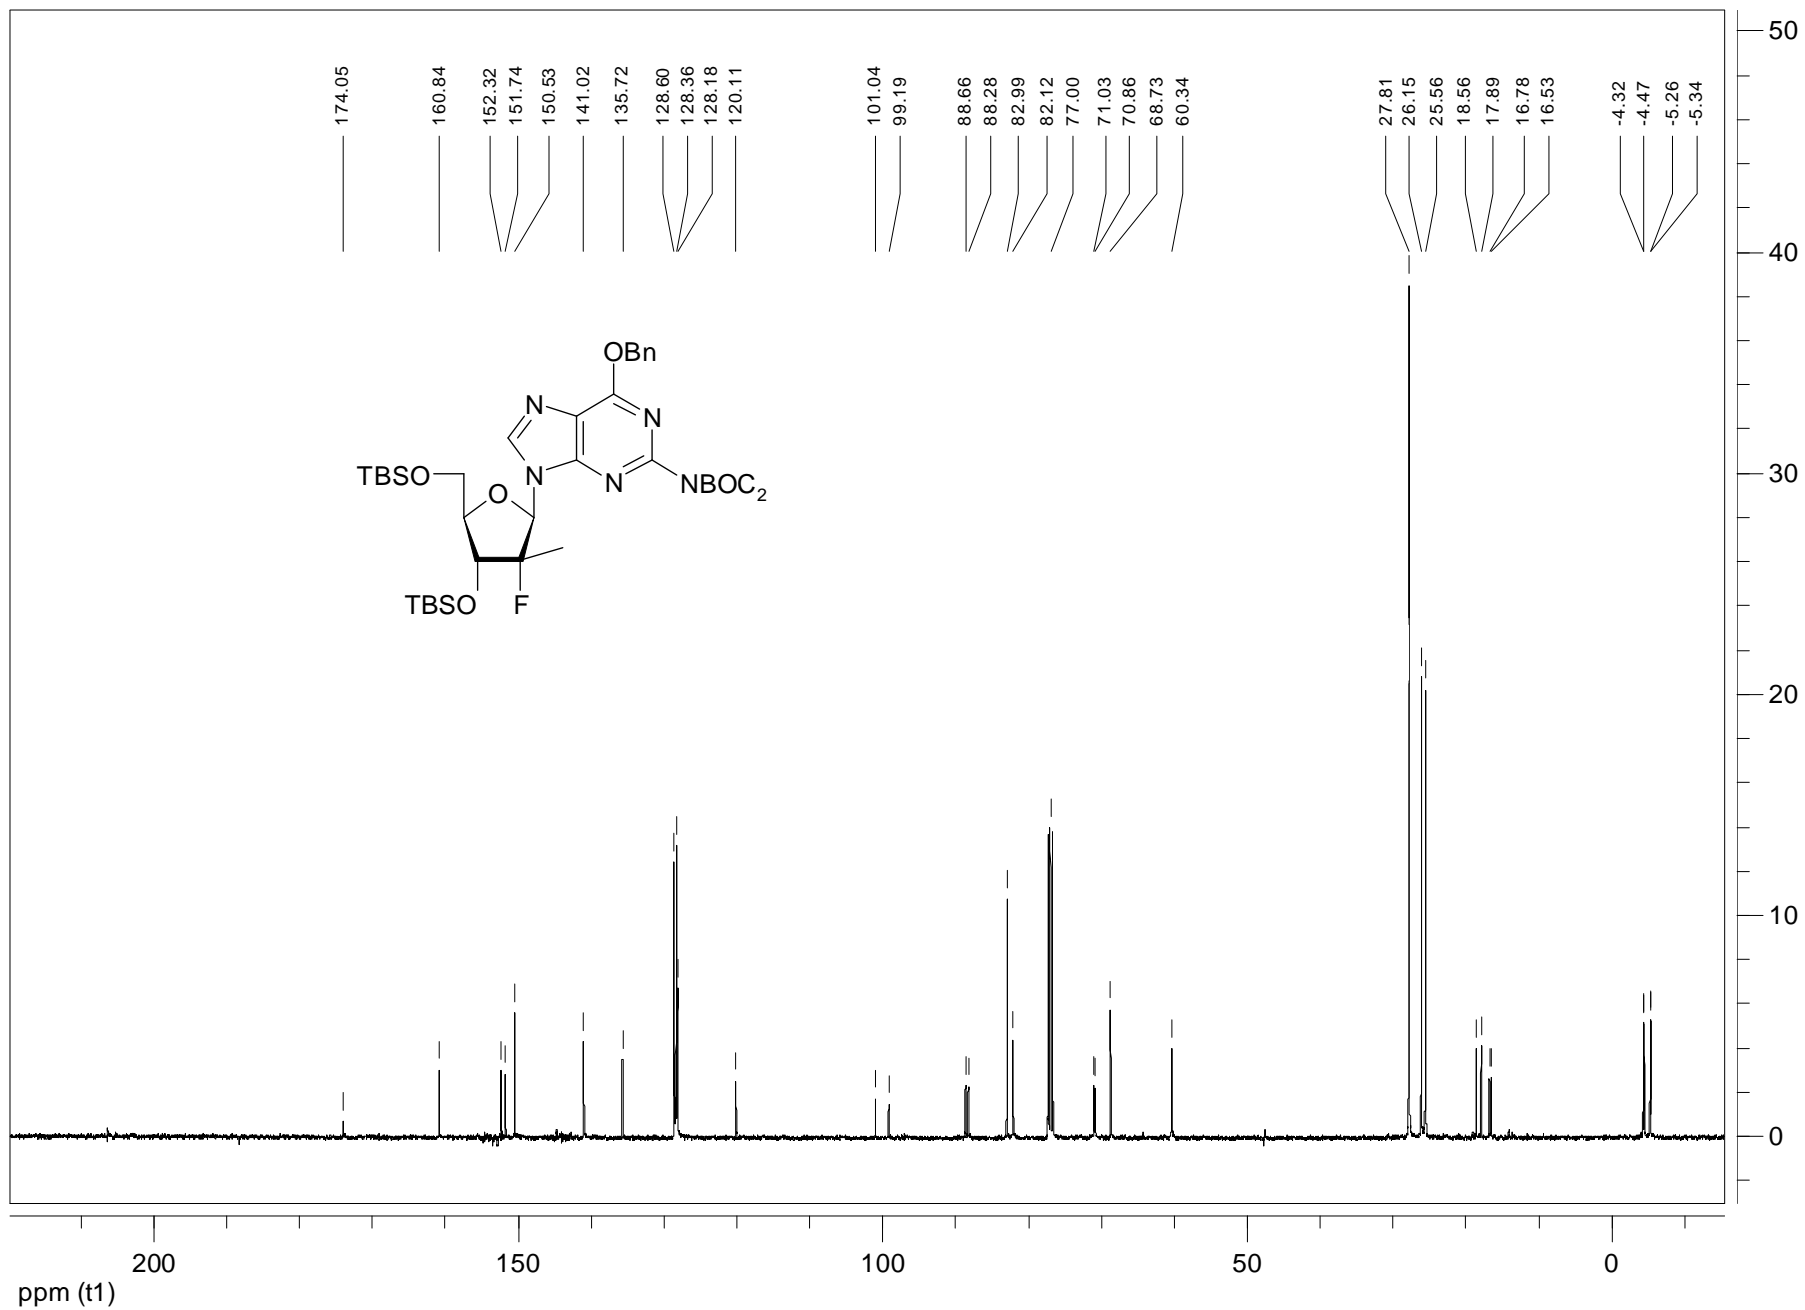

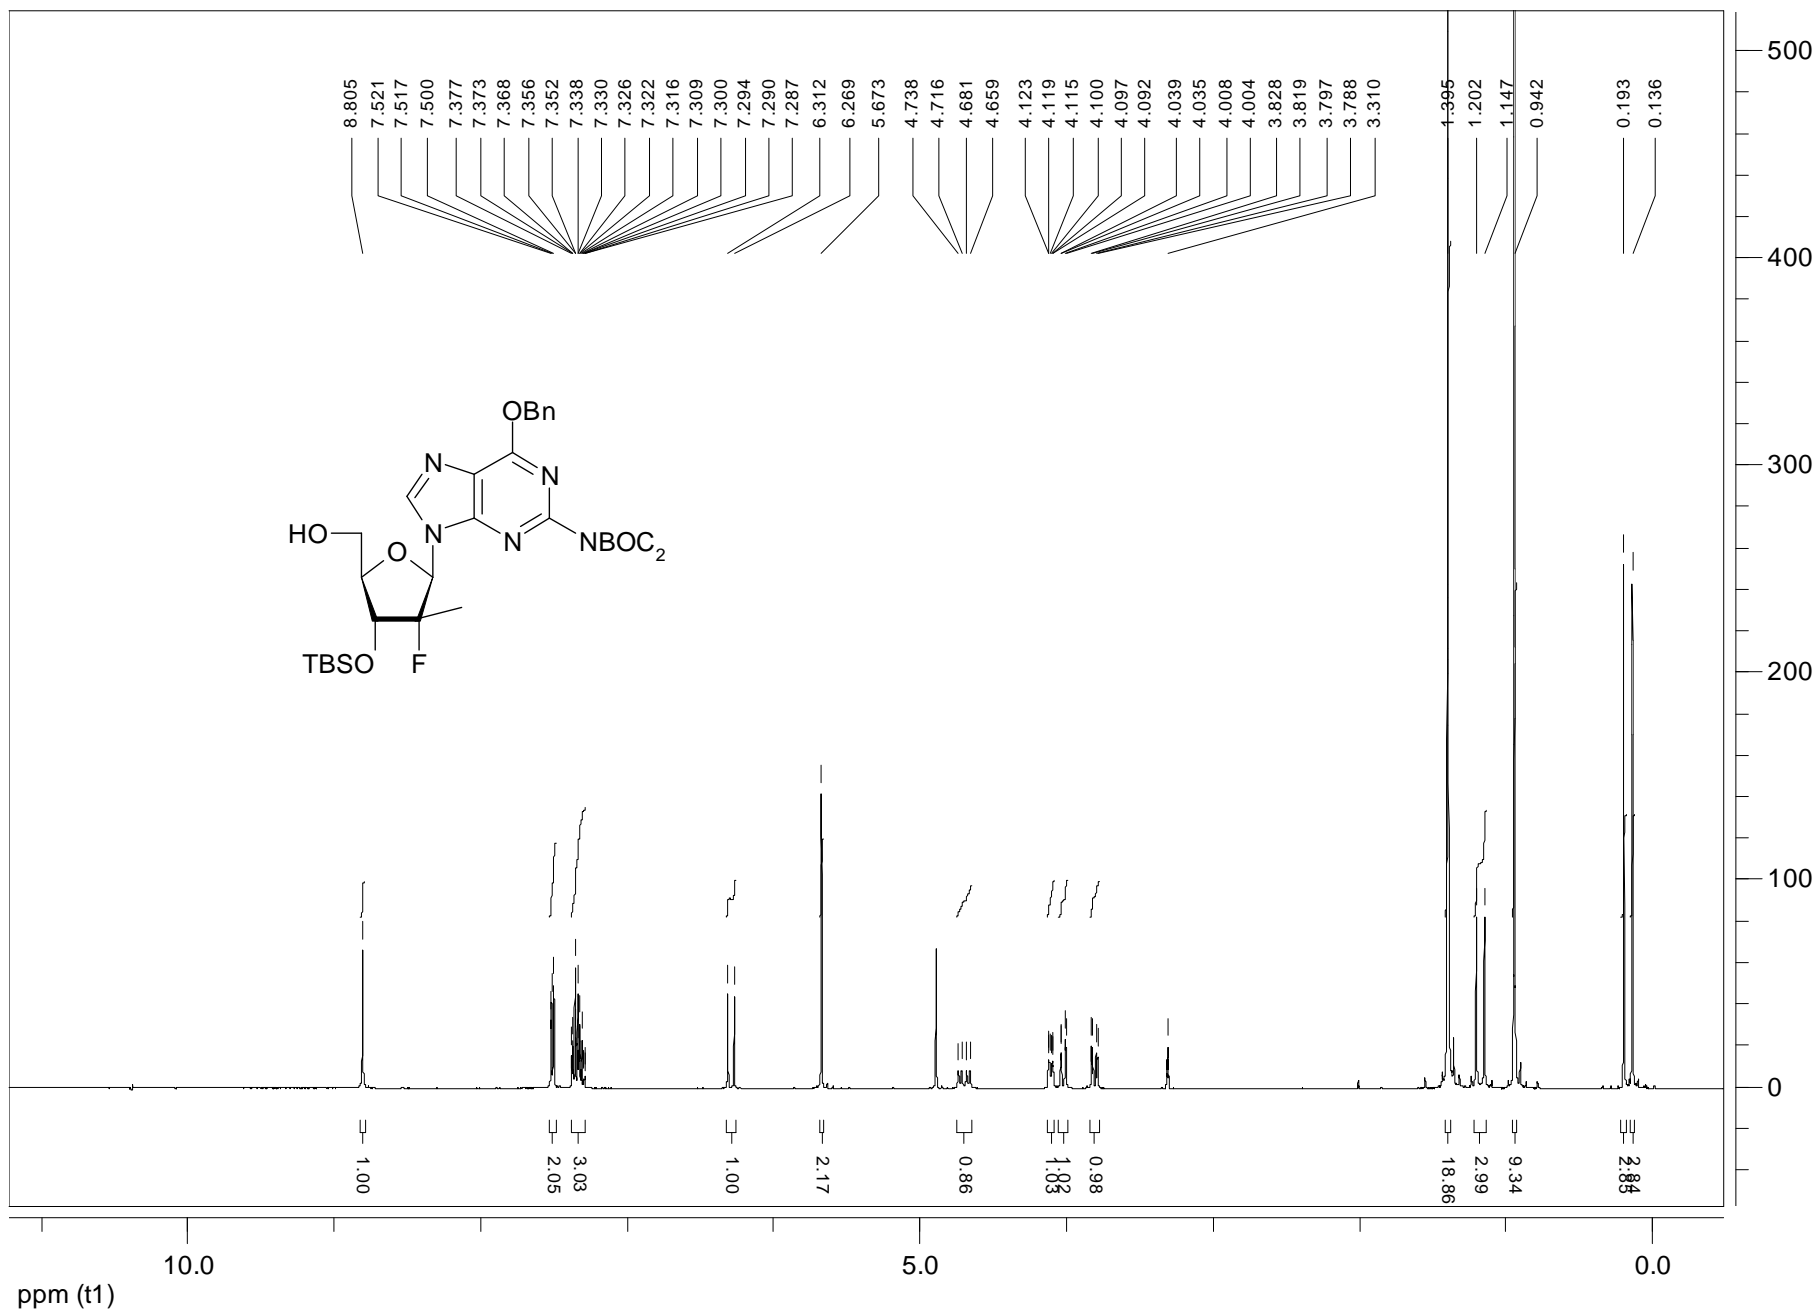



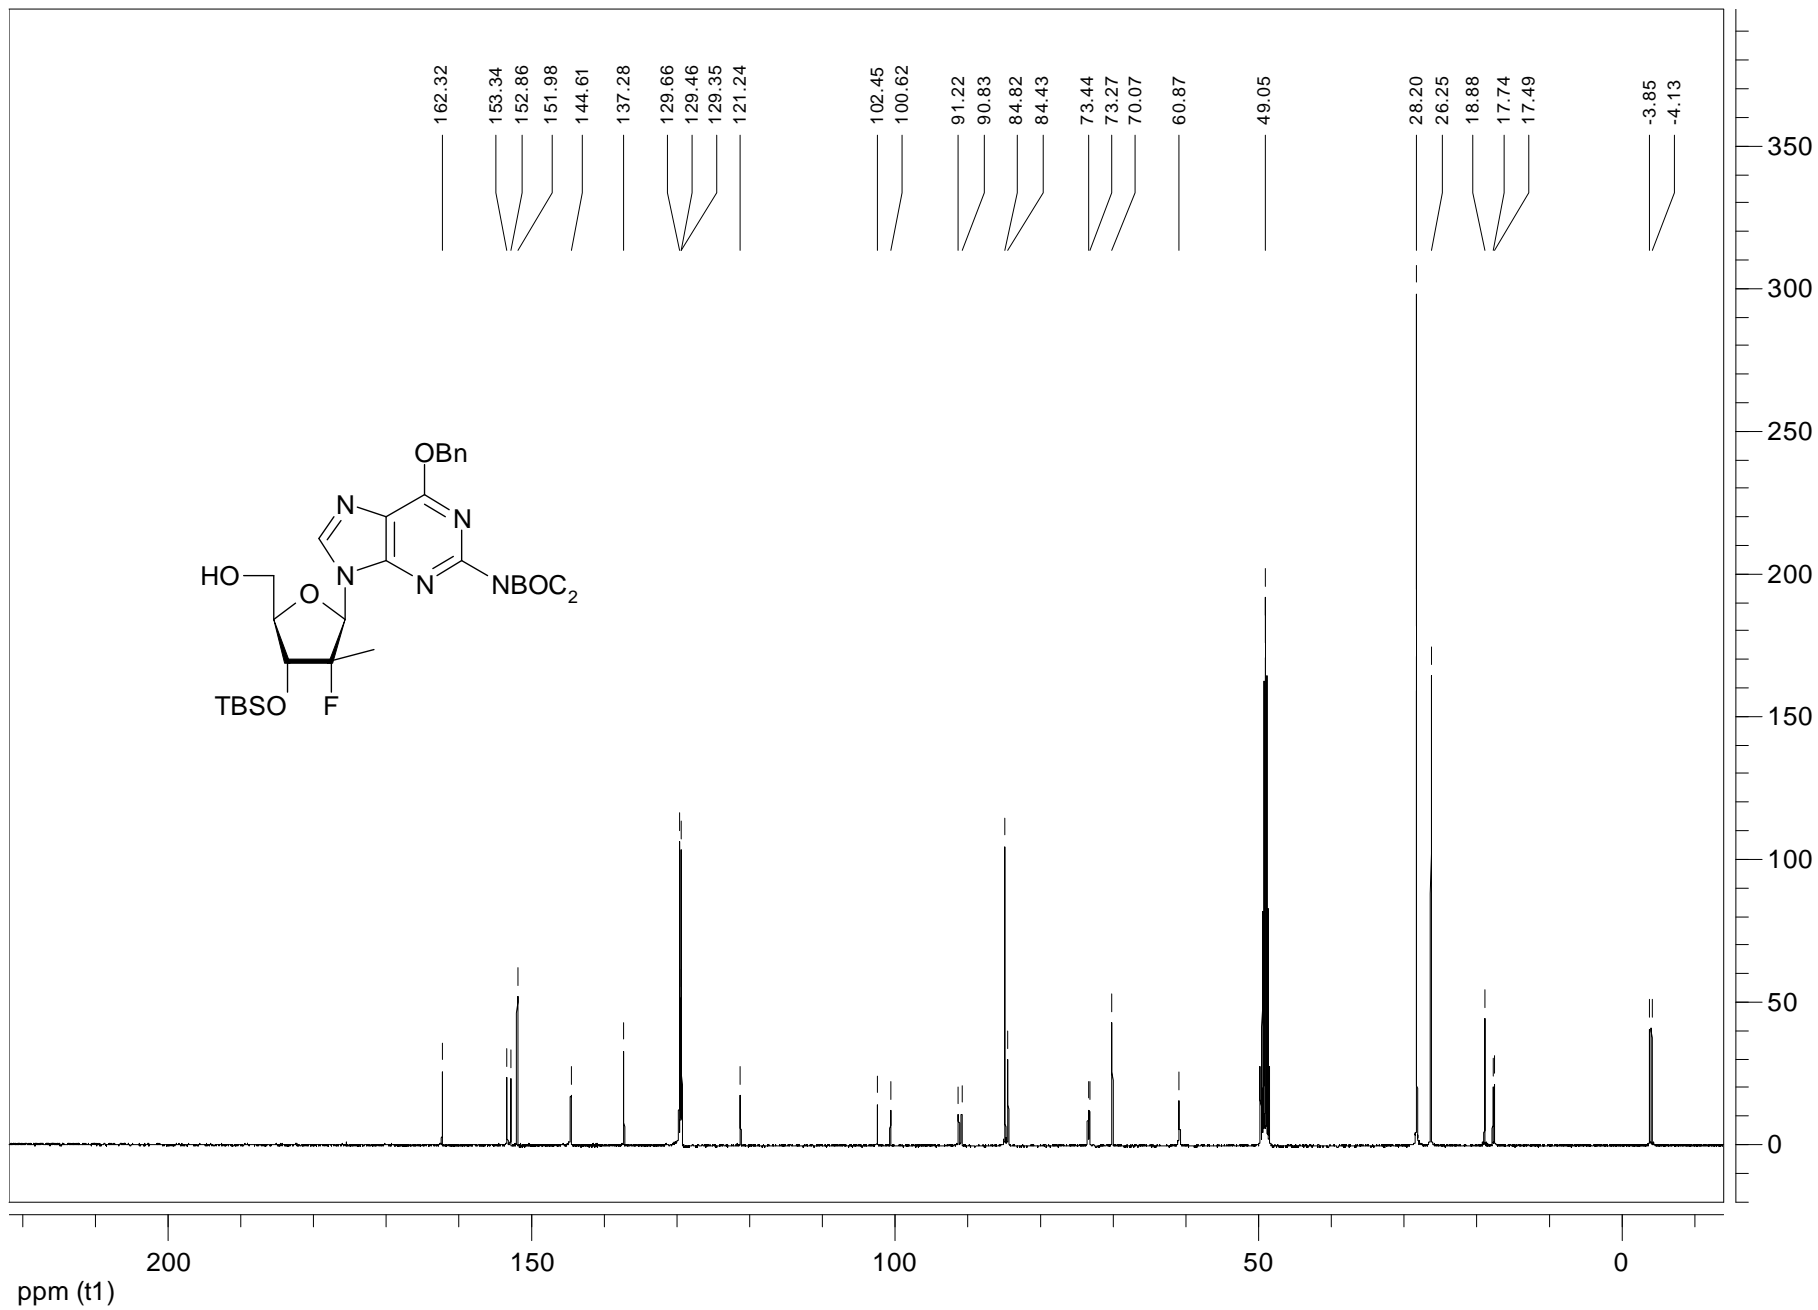

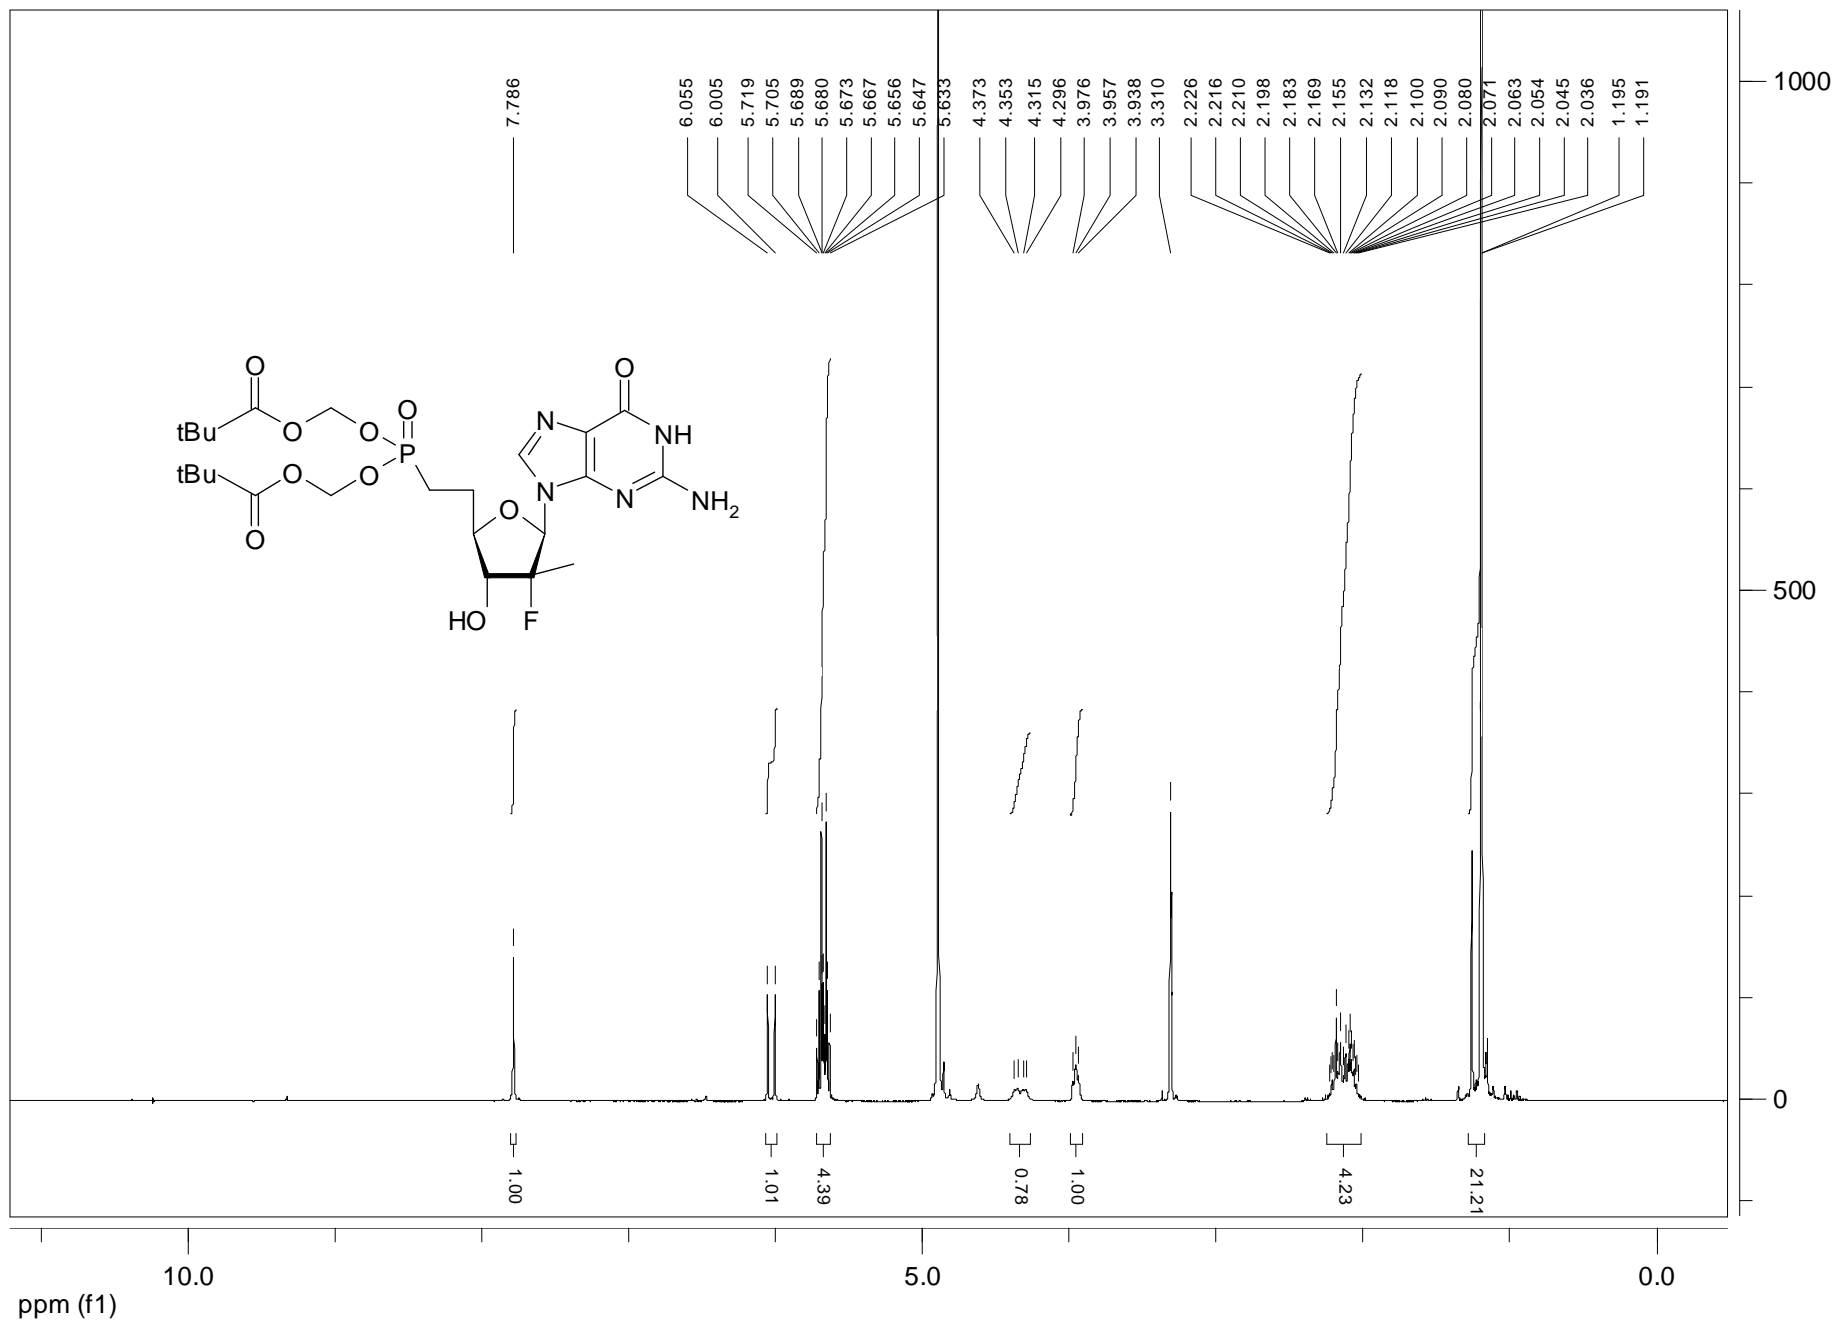

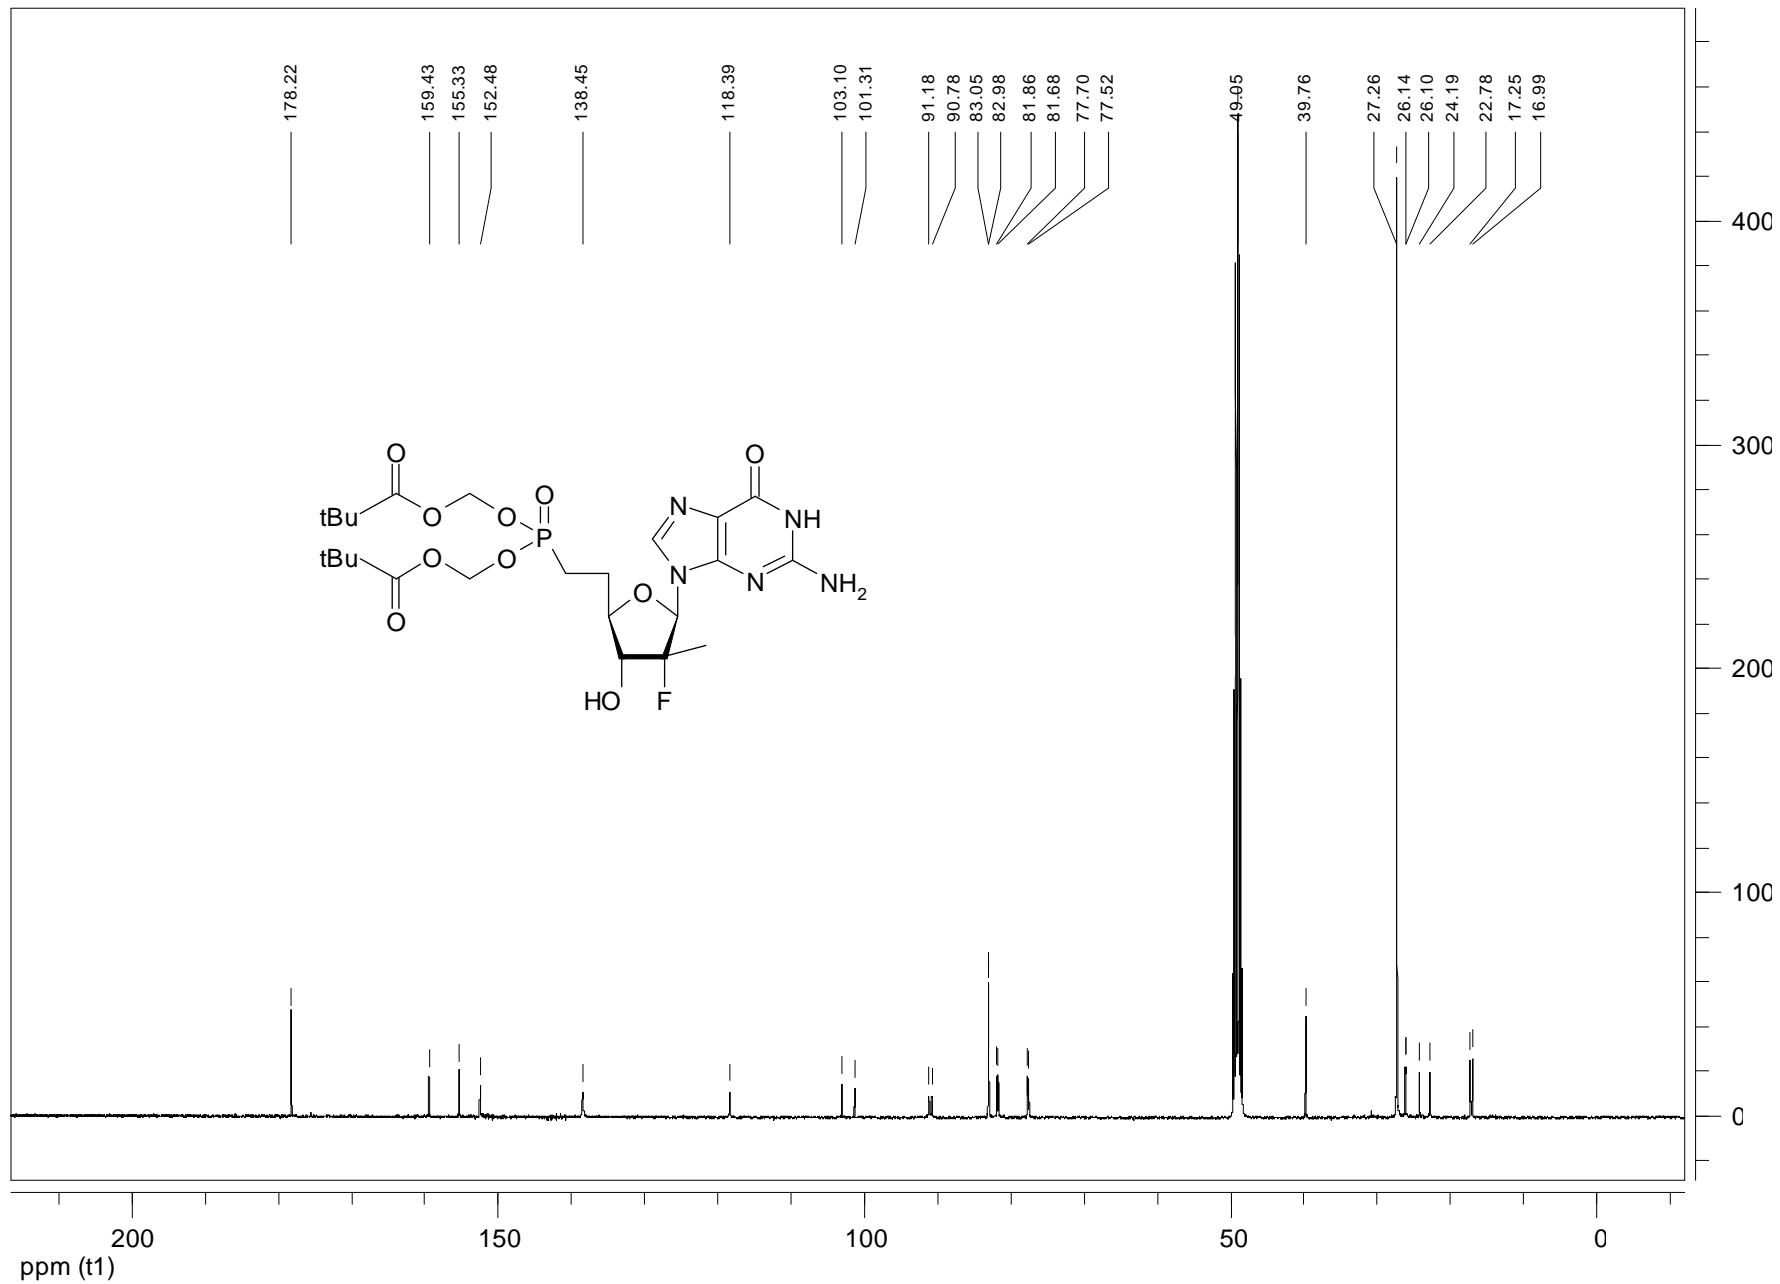

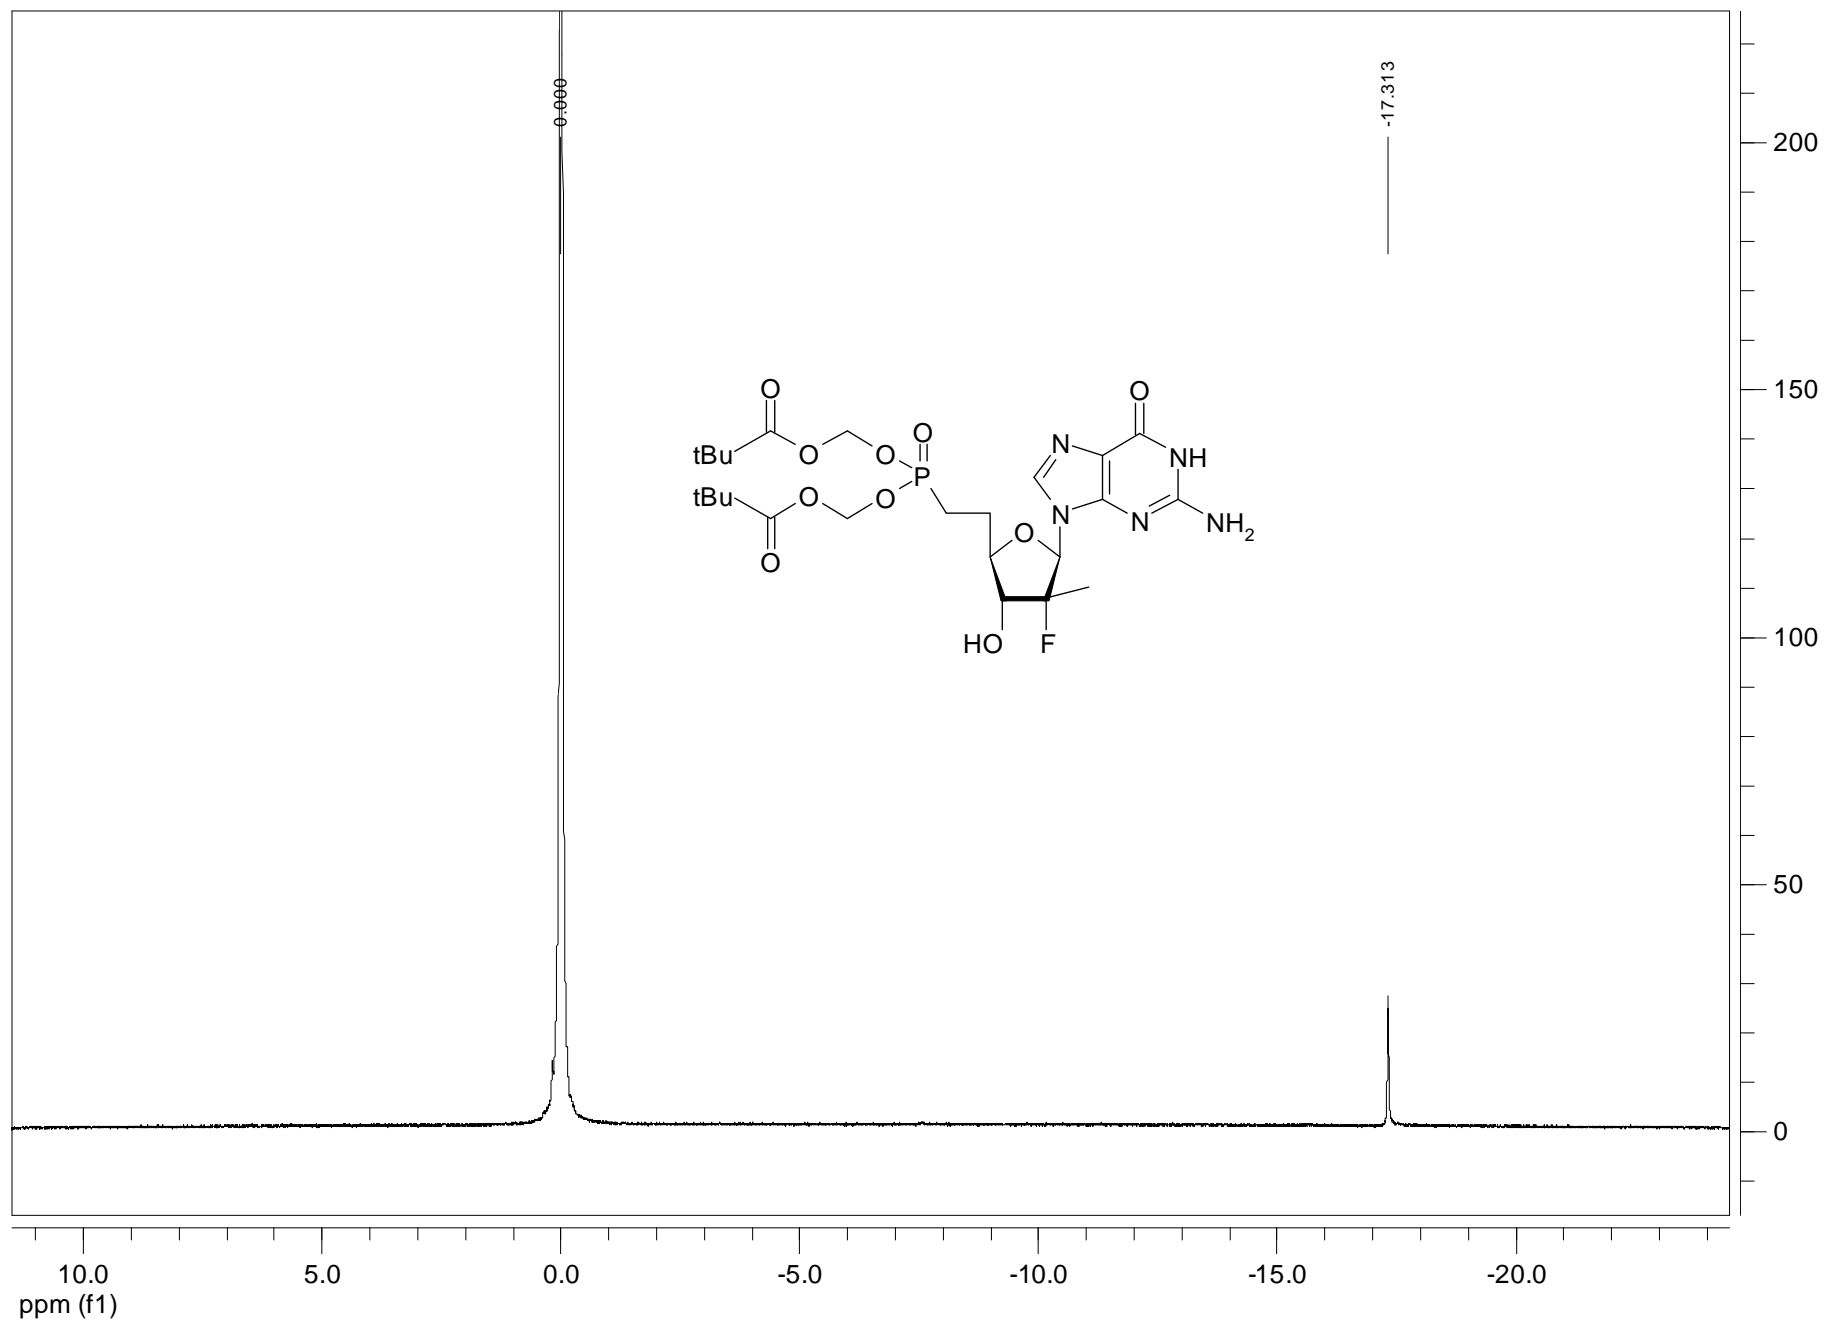

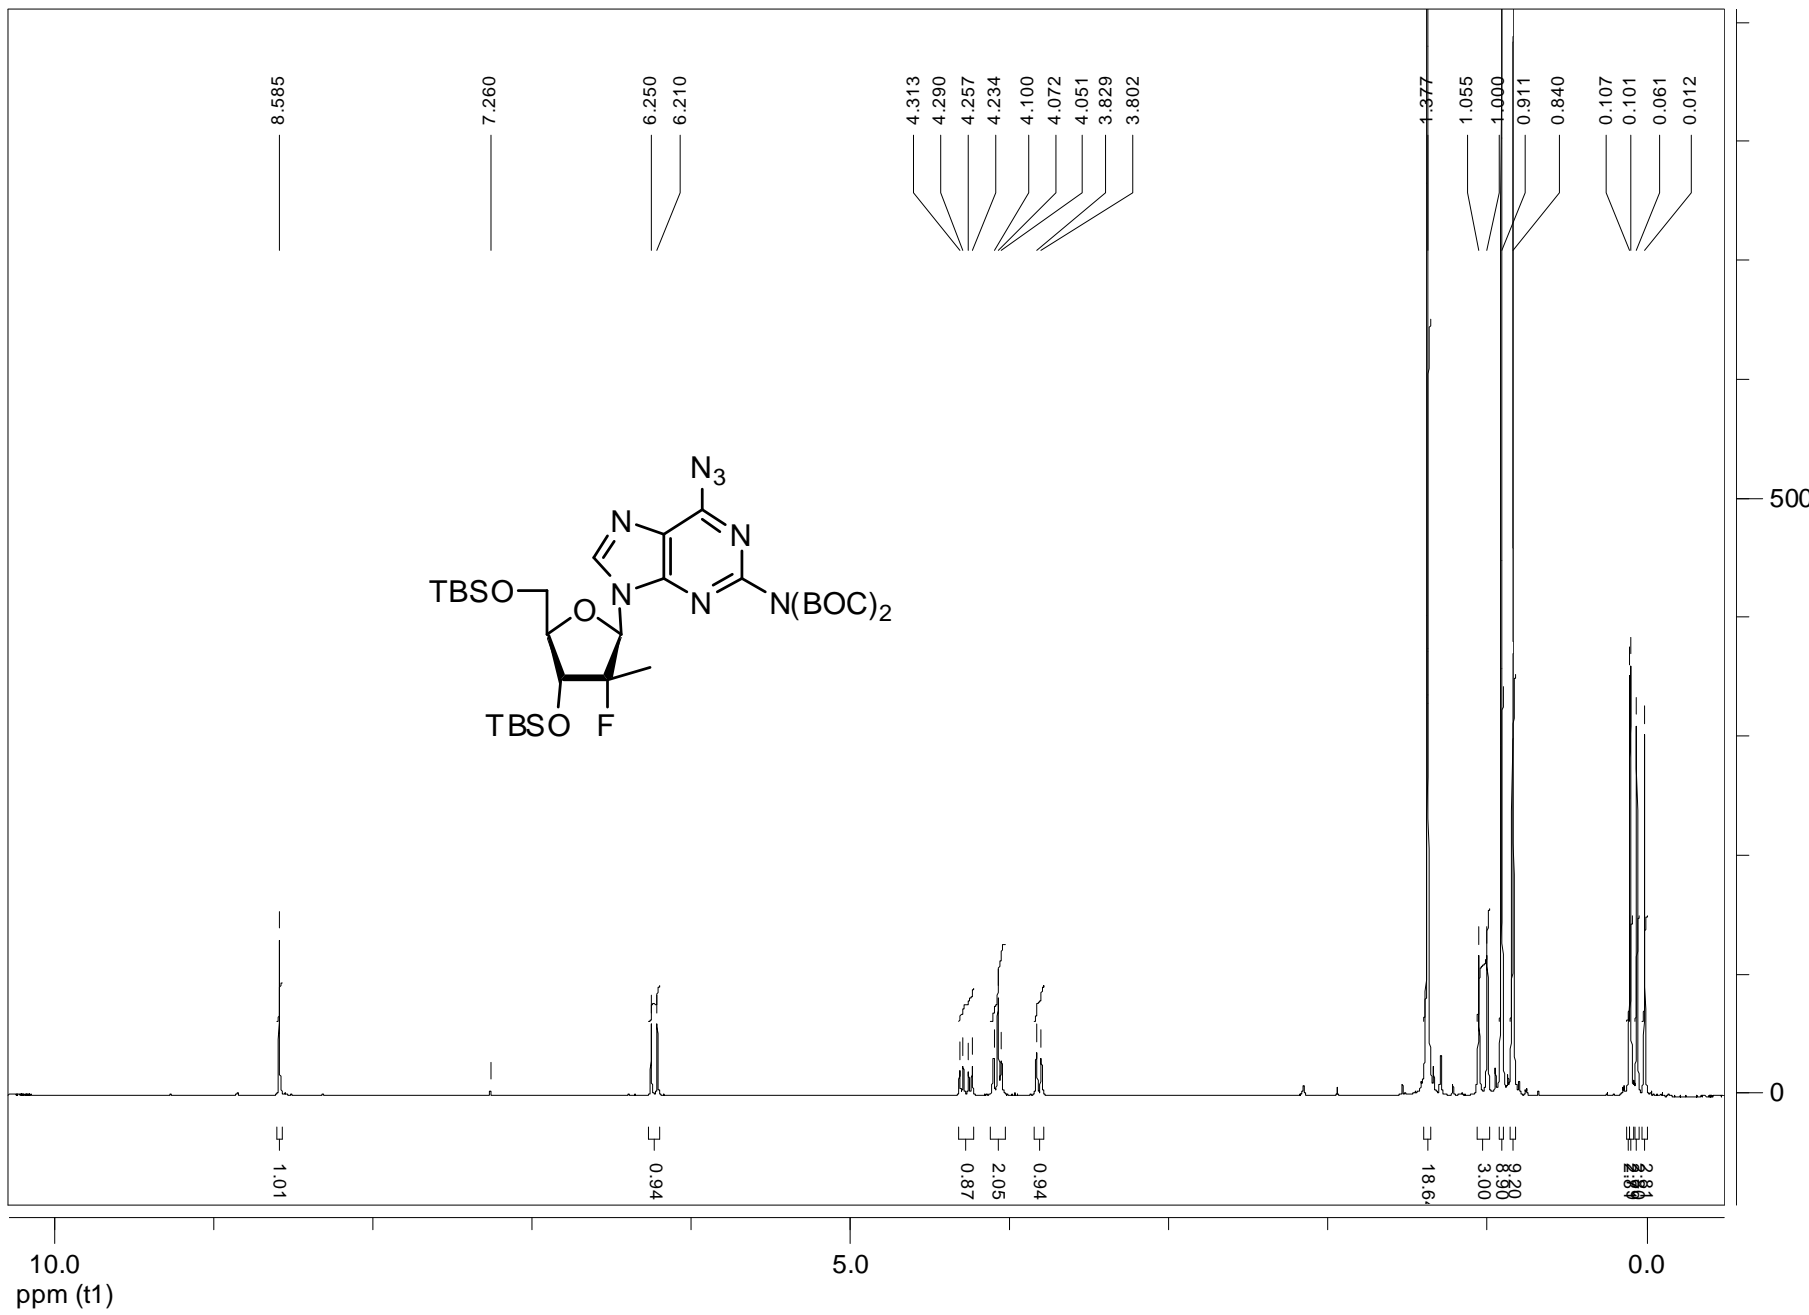



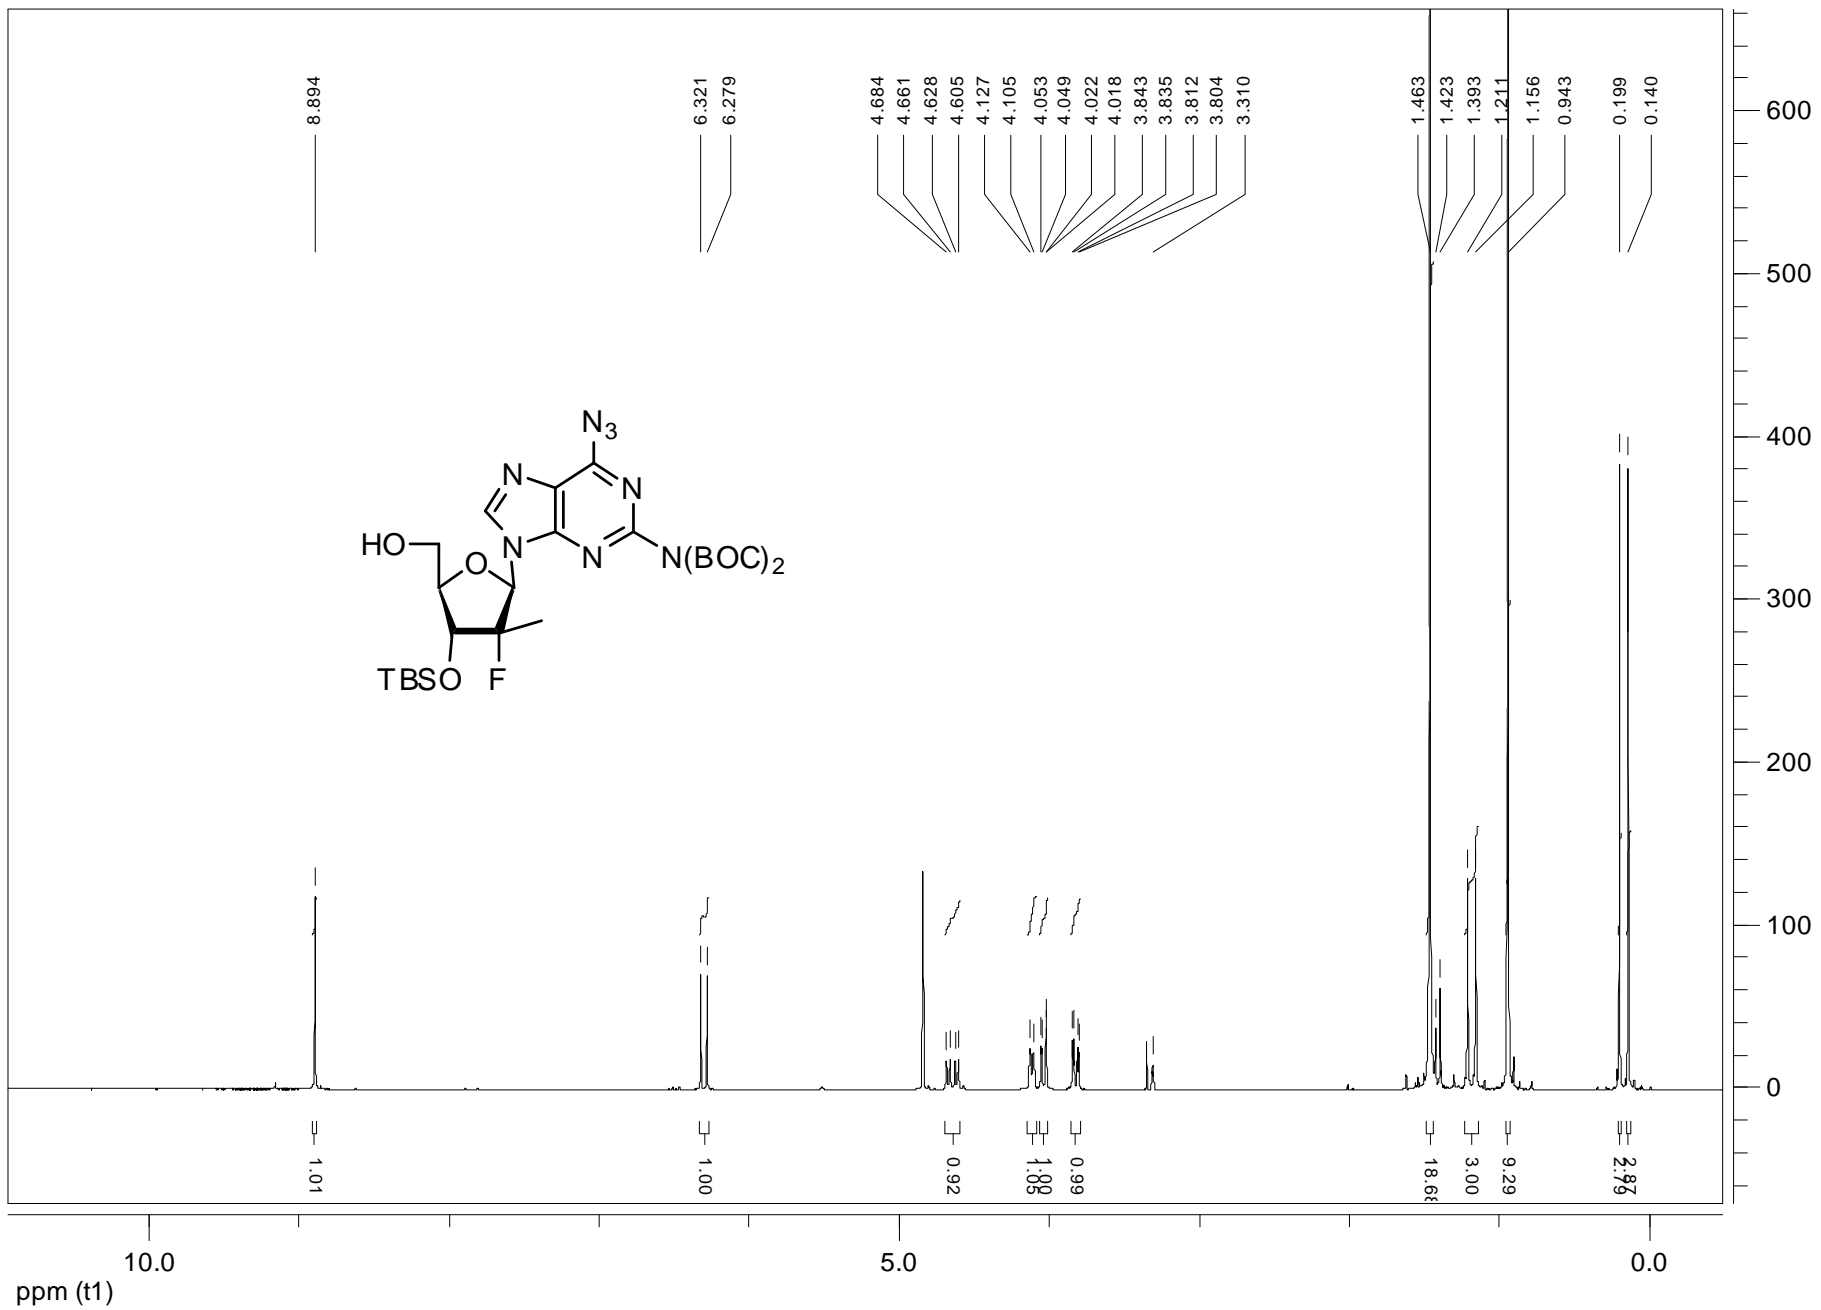

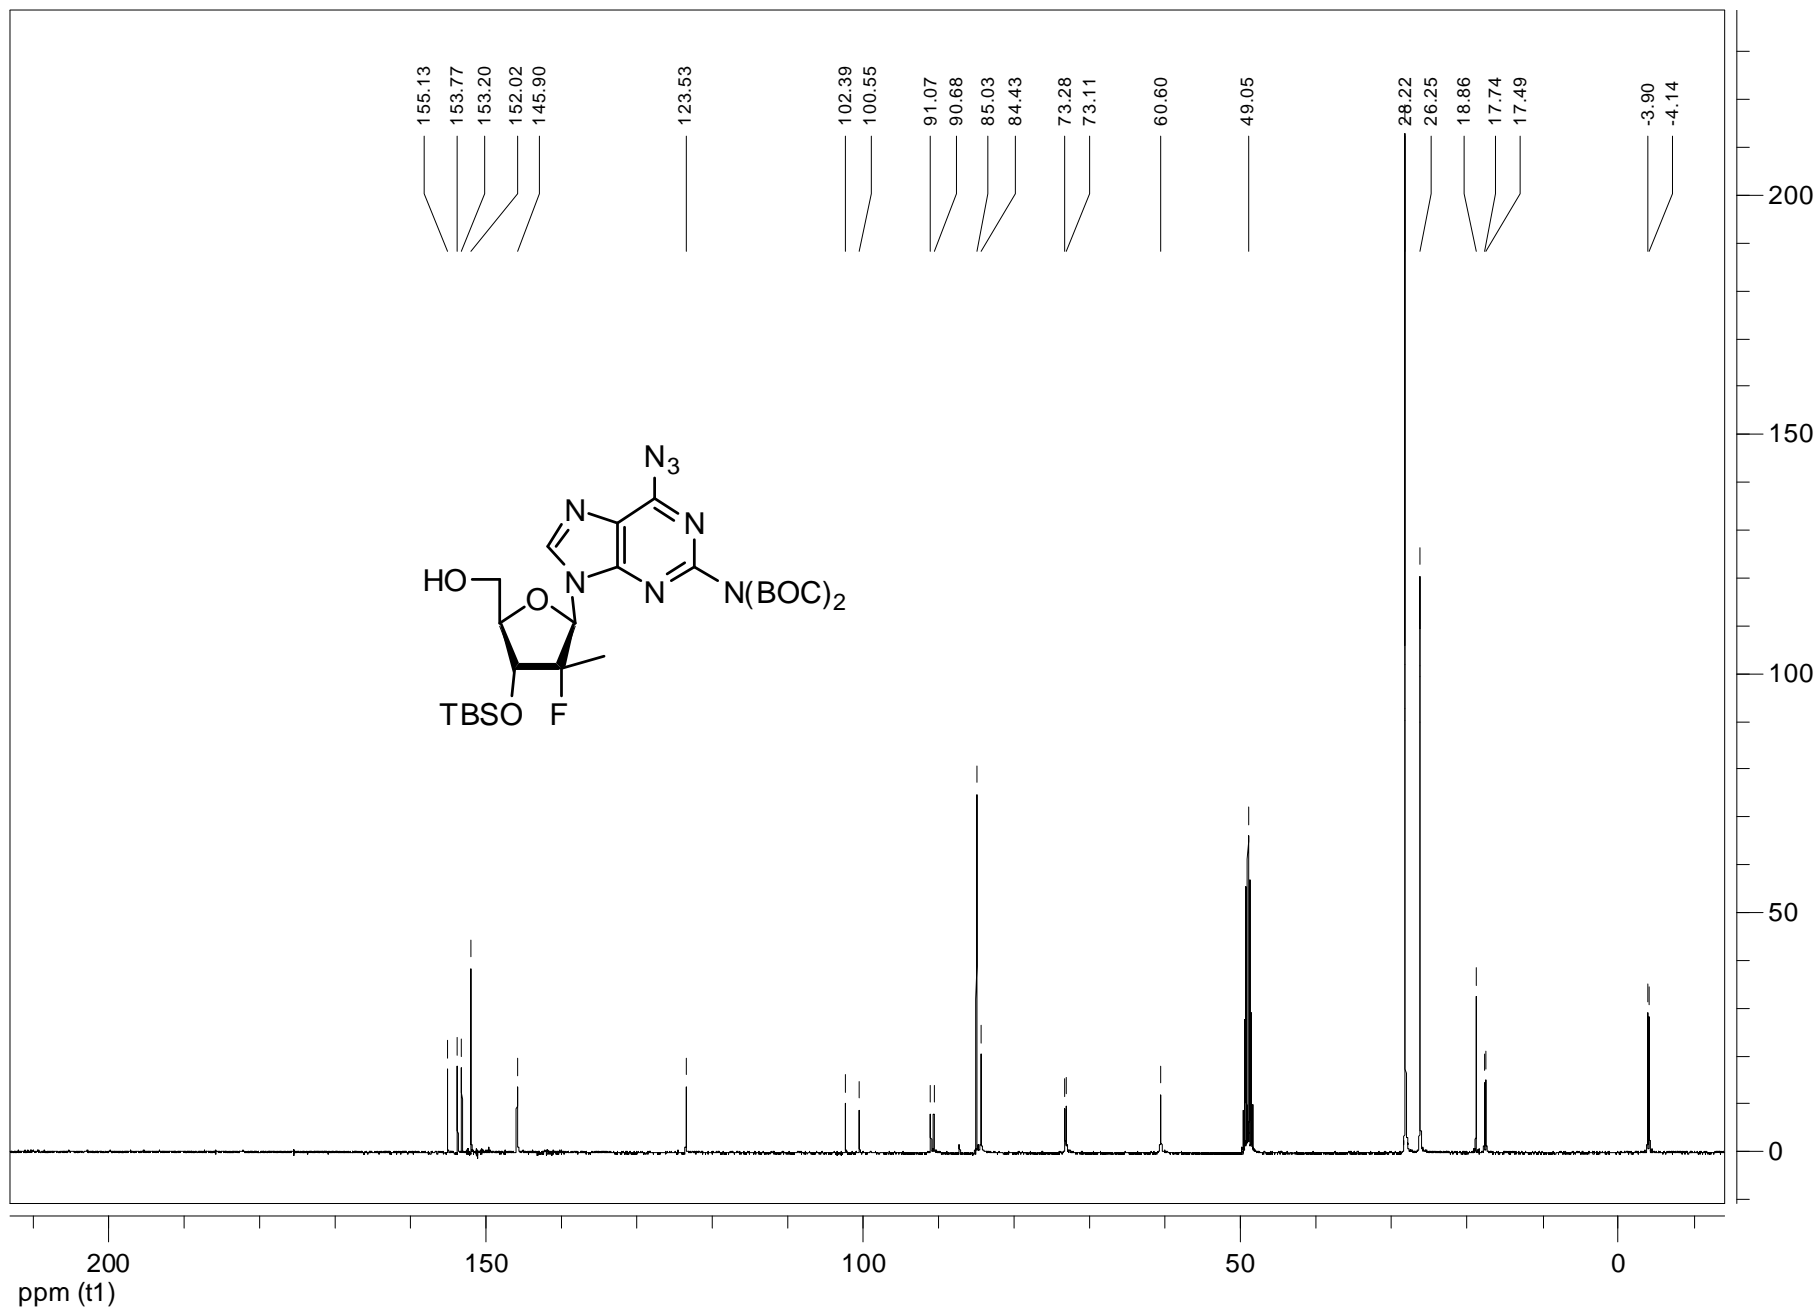



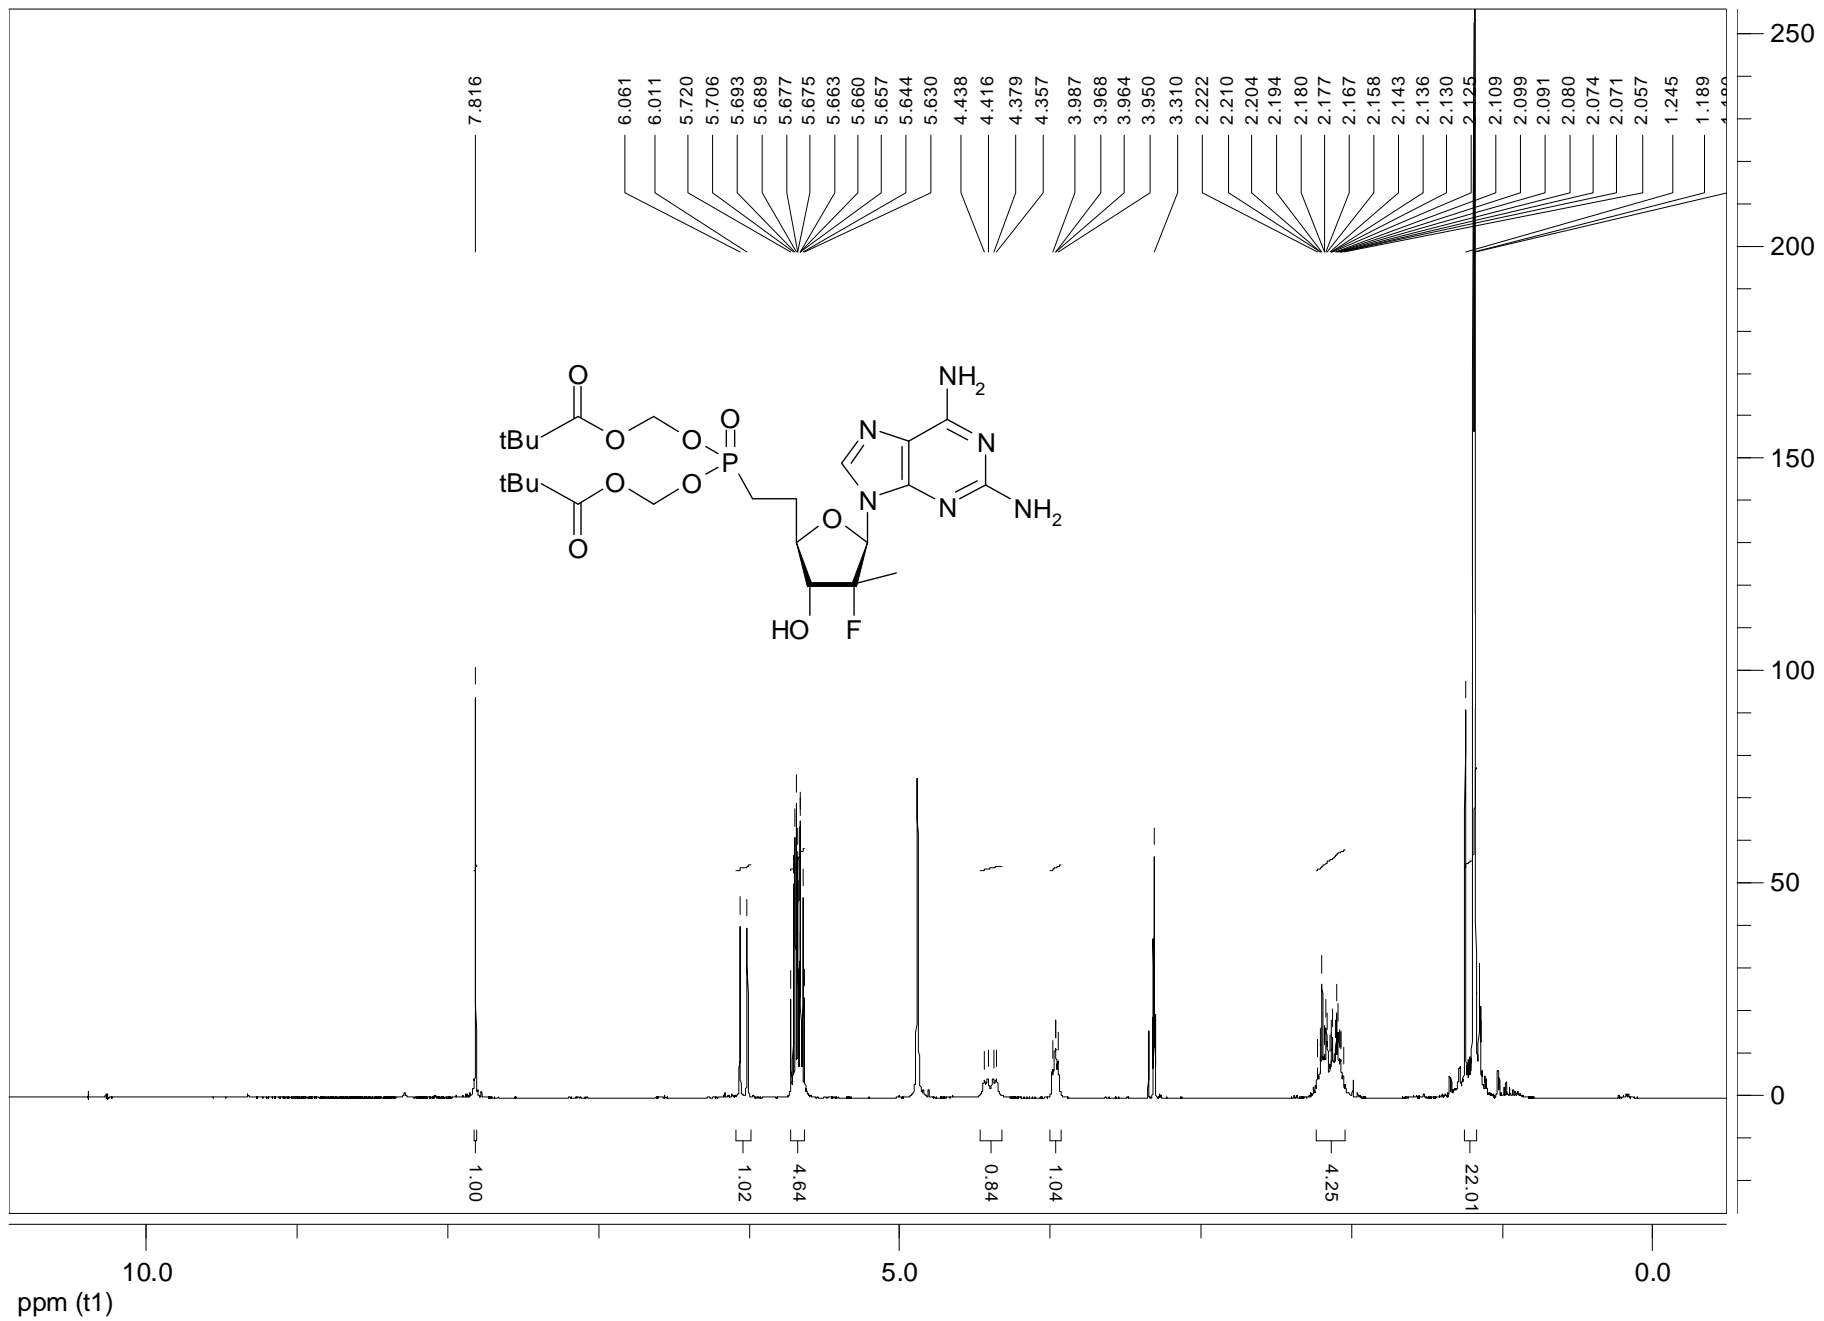

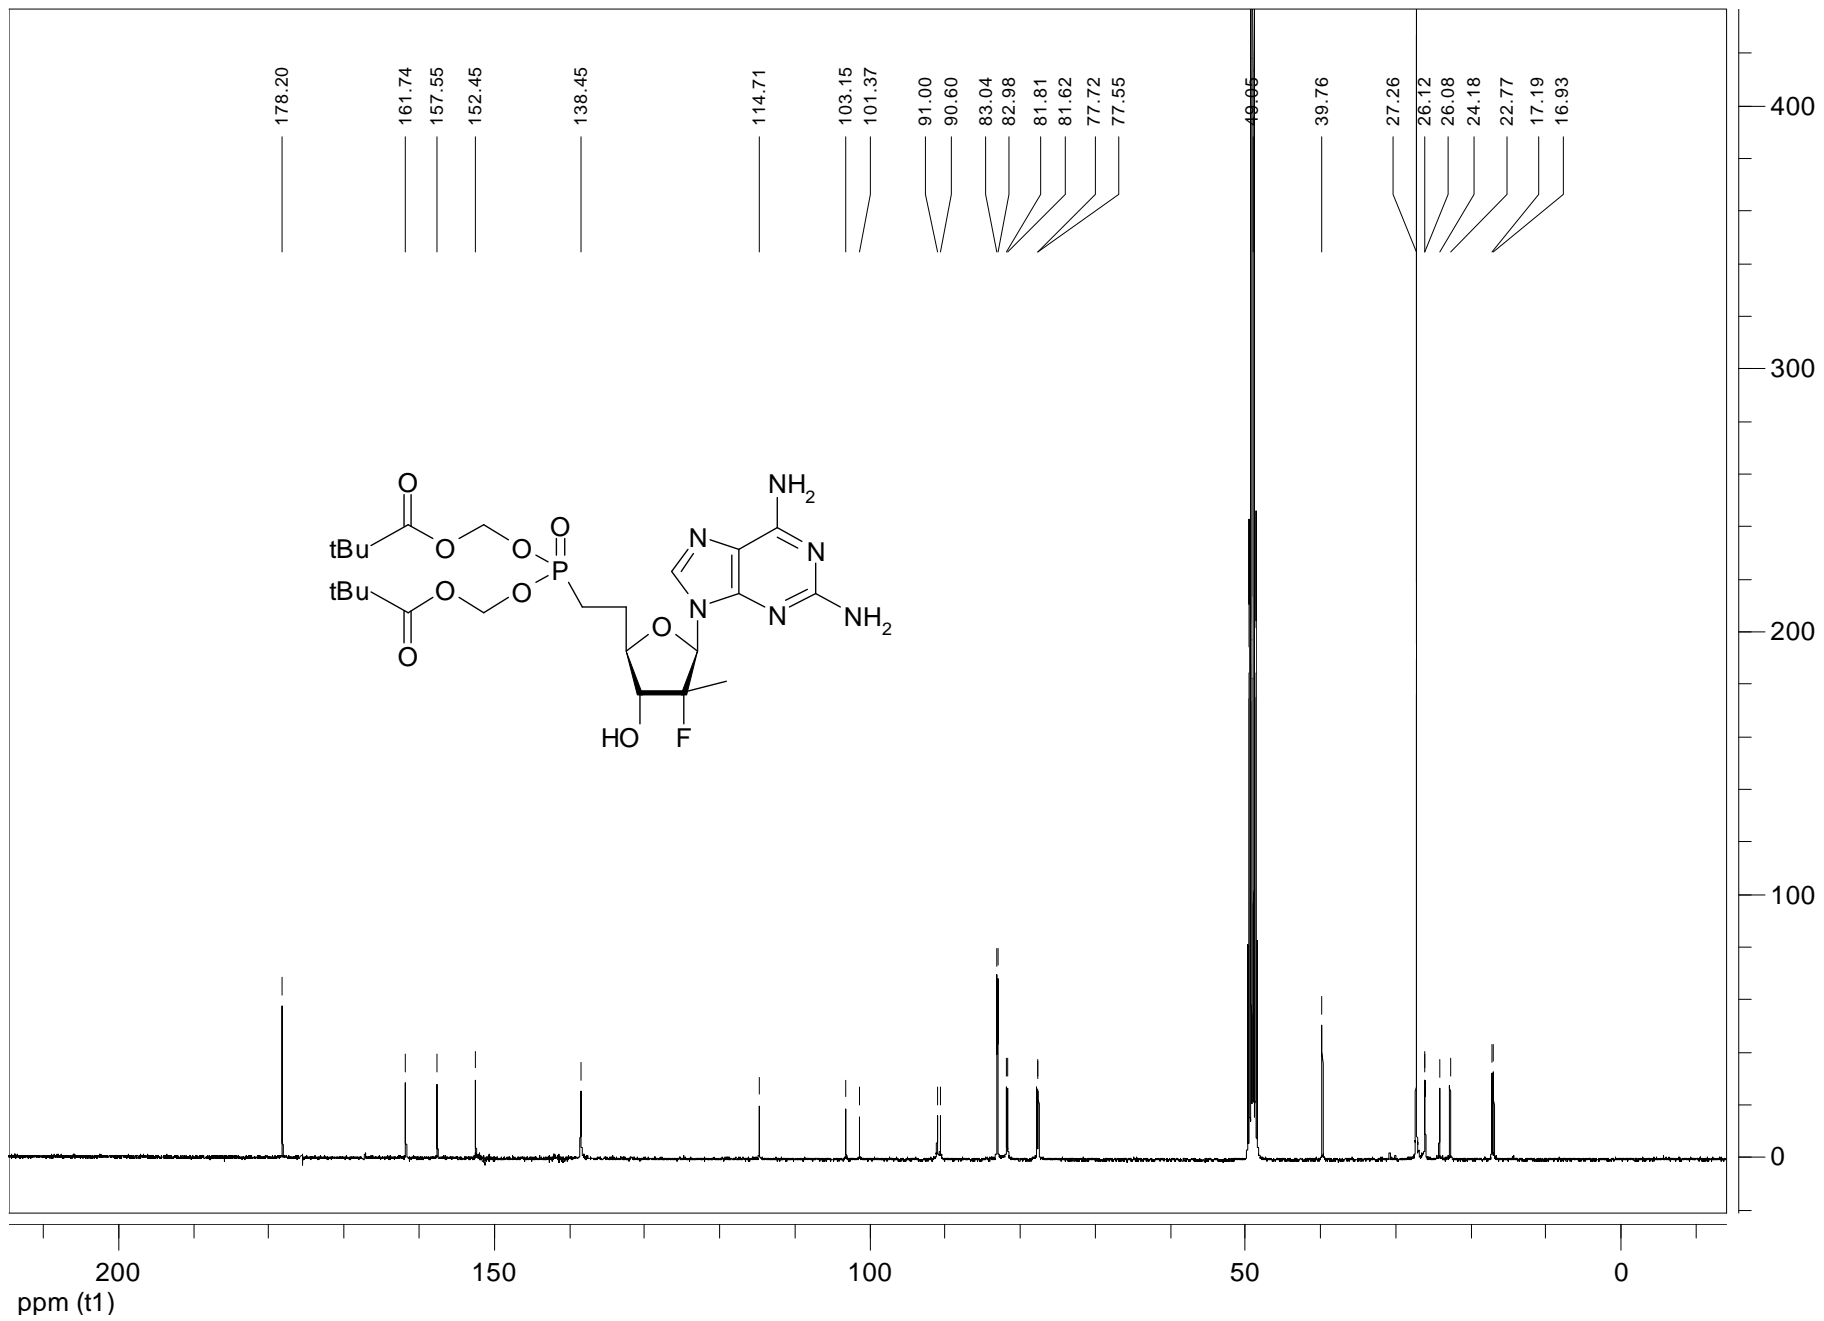

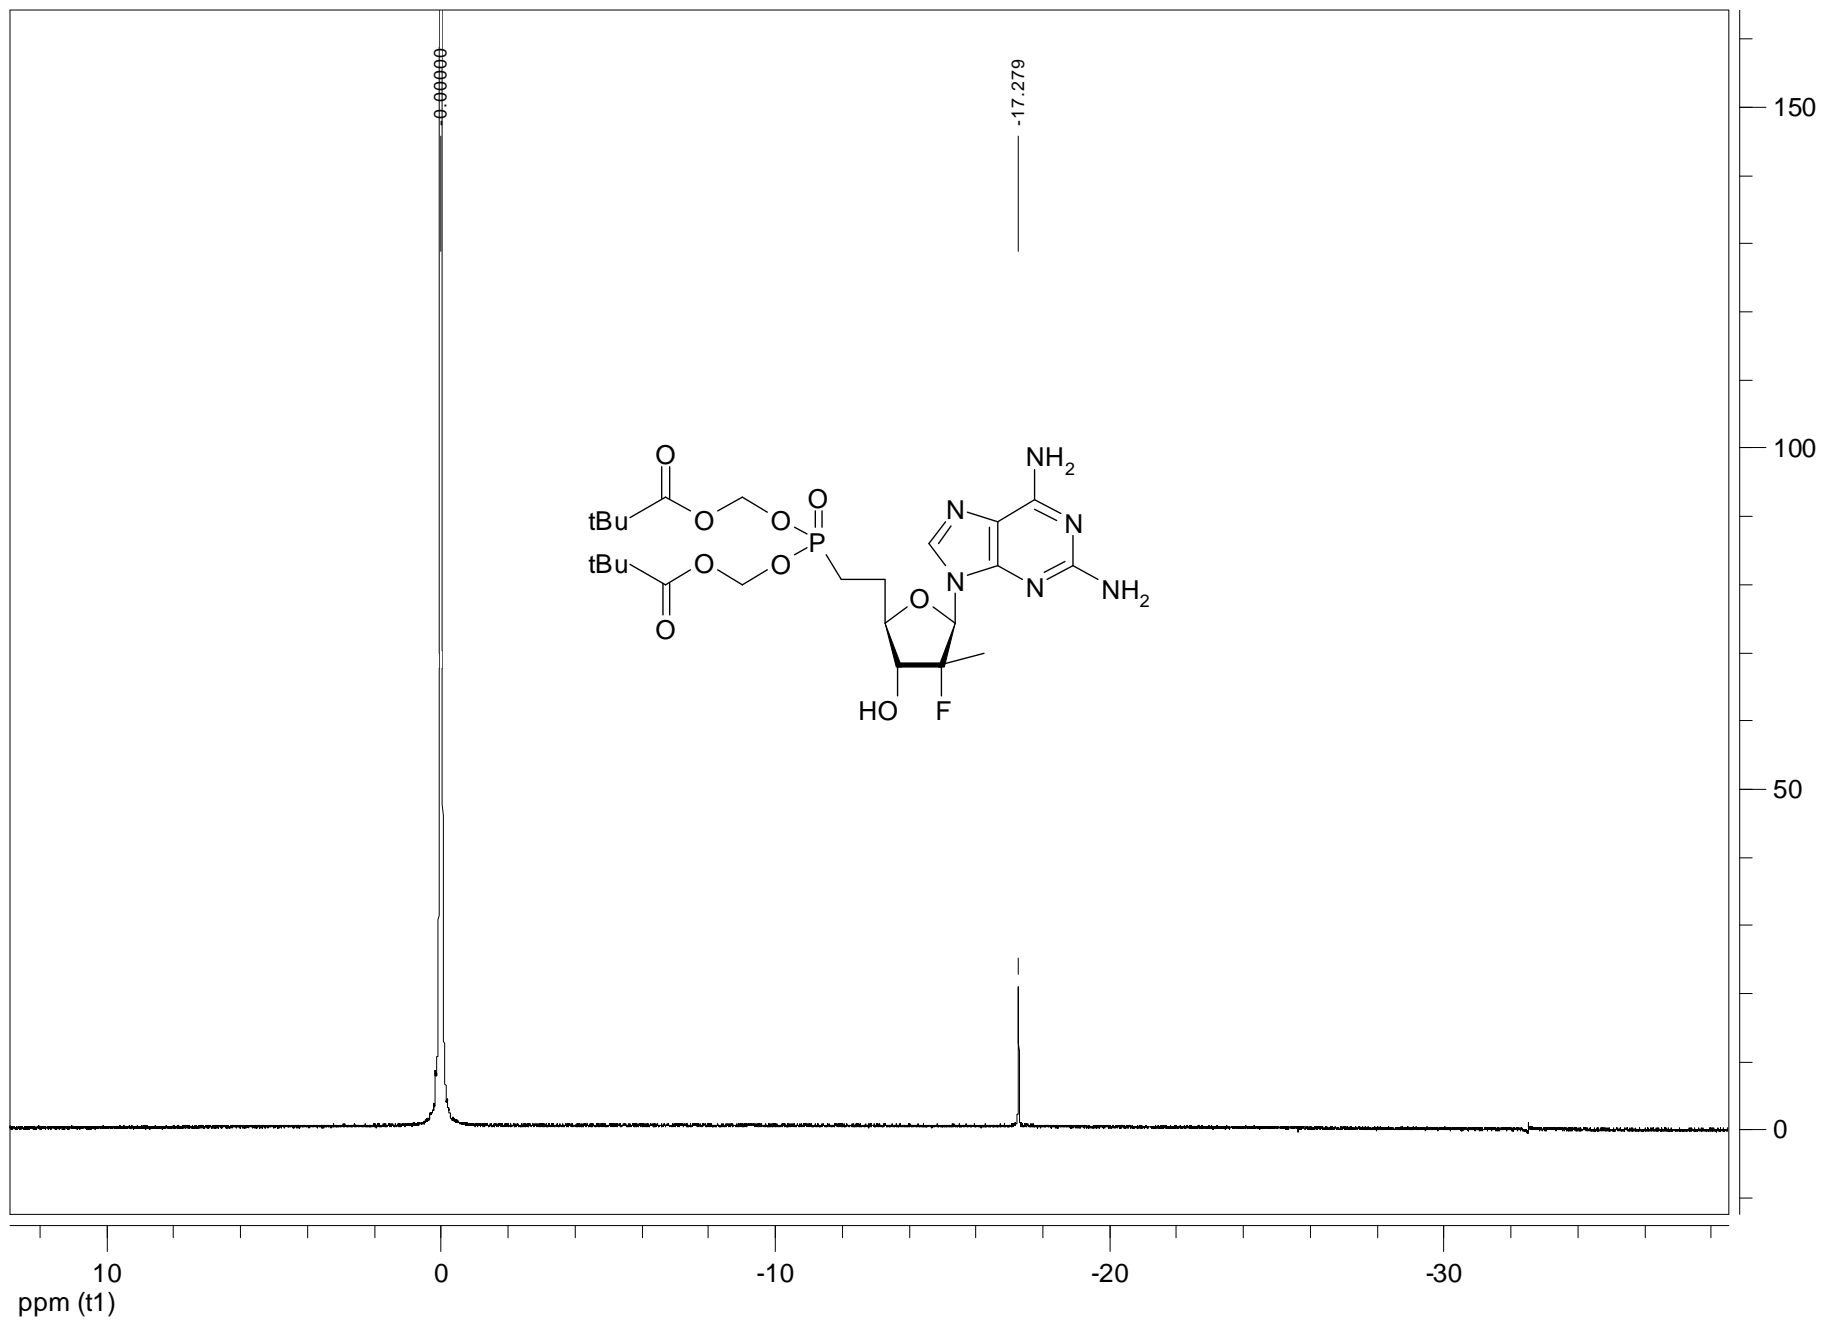

Supplement: NIHMS403331-supplement-2_si_002.pdf [file NIHMS403331-supplement-2_si_002.pdf]
